# Supplementary material for: Microbial Communication Drives Division of Labor in SynComs for Herbicides Degradation
Source: Research Square preprint supplement (doi:10.21203/rs.3.rs-8076029/v1), 2025-12-03
Supplement: Supplementary file 1 [file 1292cc08a6bd21d44857a020.docx]

**Microbial Communication Drives Division of Labor in SynComs for Herbicides Degradation**

Yuxiao Zhang1, Jack A. Gilbert2,3, Li Nie1, Yumeng Zhang1, Ping Huang1, Weijie Luo1,4, Xiyuan Xu1,4, Ru Sun1,4, Kaixiang Shi5, Xihui Xu6, Ningyi Zhou7, Jiabao Zhang1, Haiyan Chu1,4,*

1State Key Laboratory of Soil and Sustainable Agriculture, Institute of Soil Science, Chinese Academy of Sciences, Nanjing, 211135, China

2Department of Pediatrics, School of Medicine, University of California San Diego, La Jolla, 92093, USA

3Scripps Institution of Oceanography, University of California San Diego, La Jolla, 92023, USA

4University of Chinese Academy of Sciences, Beijing, 101408, China

5National Key Laboratory of Agricultural Microbiology, College of Life Science and Technology, Huazhong Agricultural University, Wuhan, 430070, China

6College of Life Sciences, Nanjing Agricultural University, Nanjing, 210095, China

7School of Life Sciences and Biotechnology, Shanghai Jiao Tong University, Shanghai, 200240, China

***** Corresponding author:

Haiyan Chu, State Key Laboratory of Soil and Sustainable Agriculture, Institute of Soil Science, Chinese Academy of Sciences, Nanjing, 211135, China.

Email: hychu@issas.ac.cn

**Methods**

**Soil sampling and strain enrichment**

Each site measured 100 m × 100 m, with samples collected from a depth of 20 cm. Within each site, five subplots (10 m×10 m) were established, and non-rhizosphere soil samples were collected using a five-point mixed sampling method. Samples from each subplot were combined into one composite sample per site. The black soil zone spans from the foothills and hilly areas of the Lesser and Greater Khingan Mountains to the Songnen Plain, which is predominantly used for cultivating maize, soybean, and spring wheat1-3. The black soil experiences a temperate semi-humid continental monsoon climate, with mean annual temperatures ranging from –5.5 °C to 13 °C and annual precipitation between 530 and 630 nm.

**SEM analysis**

Samples of cells were collected and then centrifuged at 12,000 rpm for 5 min, and the precipitates were washed 3 times with ddH2O. Samples were immobilized by 2.5% glutaraldehyde solution for 12 h and then centrifuged (12,000 rpm, 5 min). The precipitates were washed 3 times with ddH2O. Gradient dehydration with an ethanol sequence consisting of 30%, 50%, 70%, 85%, and 90% ethanol once each, and 100% ethanol twice. Each sample was dehydrated for 15 min and centrifuged at 12,000 rpm for 5 min to remove supernatants. A part of precipitates was freeze-dried using a freeze drier for 24 h and used for SEM4, 5.

**Herbicides concentration determination**

HPLC-MS was used to detect the content of herbicides in this study4, 6. Freeze-dried soil was sieved, and 10 g of sieved soil was accurately weighed into a 50 mL centrifuge tube. 5 mL of pure water and 20 mL of acetonitrile containing 0.5% acetic acid were added, and the sample was extracted by shaking for 1 h and ultrasonic extraction for 30 min after soaking overnight. 2.5 g of sodium chloride was added into the centrifuge tube, and the extracted sample was shaken for 1 min. Then the sample was centrifuged at 5,000 rpm for 3 min, and the supernatant was collected in a sample bottle. 1.5 mL of the supernatant was collected through 0.22 μm organic filter membrane and put into the injection bottle for measurement. The mobile phase A was 0.2% formic acid (v/v) in water, and the mobile phase B was methanol with a flow rate of 0.3 mL/min at a column temperature of 35 ℃ and an injection volume of 10 μL.

**Proteomic processing and analysis**

Briefly, an appropriate amount of sample was treated with Reagent ① (Extract) and subjected to low-temperature non-contact ultrasonication for 10 minutes. After high-speed centrifugation (14,000 rpm, 10 min), the supernatant containing soluble proteins was collected. Peptide separation was carried out using a Vanquish Neo chromatography system (Thermo Scientific) equipped with a uPAC High Throughput column (75 μm × 55 cm, Thermo Scientific, USA). Mobile phase A consisted of water with 2% acetonitrile and 0.1% formic acid, and mobile phase B contained 80% acetonitrile with 0.1% formic acid. The total chromatographic runtime was 8 minutes. Data acquisition was performed using Compass HyStar software (Bruker, Germany). Separated peptides were analyzed using a timsTOF Ultra2 mass spectrometer (Bruker, Germany) operated in positive ion mode with an ion source voltage of 4.5 kV. The mass spectrometry scanning range was set to 100–1700 m/z.

Search parameters were configured as follows: peptide length 7–52; enzyme: trypsin/P; maximum missed cleavages: 2; variable modifications: oxidation (M) and acetyl (protein N-terminus); fixed modification: carbamidomethyl (C); protein FDR ≤ 0.01; peptide FDR ≤ 0.01; peptide confidence ≥ 99%; XIC width ≤ 75 ppm. Protein quantification was performed using the MaxLFQ algorithm. Differential expression was assessed using a t-test; proteins with a p-value < 0.05 and a fold change (FC) > 1.2 were considered differentially expressed.

**Real-time quantitative PCR**

Genomic DNA was removed through digestion with RNase-free DNase I (Takara) at 37 °C, followed by the addition of 50 mM EDTA. The enzymatic reaction was terminated by heat inactivation at 65 °C for 10 minutes. cDNA was synthesized using a RevertAid First Strand cDNA Synthesis Kit (Thermo Scientific). After quantifying RNA concentration with a spectrophotometer (NanoDrop 2000, Thermo Scientific), 300 ng of total RNA was reverse-transcribed into cDNA.

**Key metabolites detection**

To assess biofilm formation, cells from different growth phases were collected and washed twice with phosphate-buffered saline (PBS, pH 7.2). The suspensions were adjusted to an optical density of 0.8 at 600 nm. Aliquots of 20 µL from each suspension were inoculated into 200 µL of fresh medium and incubated for 36 h. After incubation, the cultures were gently rinsed three times with PBS and dried at 60 °C for 30 min. Biofilms were stained with 100 µL of 1% (v/v) crystal violet (CV) solution for 15 minutes at room temperature. Unbound dye was removed by washing three times with PBS, and the samples were heat-fixed at 65 °C for 60 minutes. The stained biofilms were eluted with 200 µL of 33% acetic acid, and biofilm mass was quantified by measuring the absorbance at 595 nm.

ATP and NADH extraction and measurement: Cells from respective growth phases were harvested by centrifugation at 12,000 rpm for 5 min at 4 °C. The pellets were resuspended in 1 mL of buffer containing 0.4 M perchloric acid and 1.0 mM EDTA, followed by ultrasonication on ice for 5 min. Intact cells and debris were removed by subsequent centrifugation (12,000 rpm, 5 min, 4 °C). The supernatant was neutralized to pH 7.0 using 1 M K₂CO₃ and filtered through a 0.22 μm membrane.

**Metabolomic analysis**

The mixture was subjected to low-temperature ultrasonic extraction for 30 minutes (5 °C, 40 kHz), incubated at −20 °C for 30 minutes, and centrifuged at 13,000 rpm for 15 minutes at 4 °C. The supernatant was collected, dried under a nitrogen stream, and reconstituted in 100 µL of reconstitution solution (acetonitrile:water = 1:1, v/v). After another round of low-temperature ultrasonication (5 °C, 40 kHz, 5 min), the sample was centrifuged again (13,000 rpm, 10 min, 4 °C). The final supernatant was transferred to an LC vial with an insert for instrumental analysis.

Metabolite separation and detection were performed using a UHPLC-Orbitrap Exploris 240 system (Thermo Fisher Scientific) operated by Meiji Biotechnology Co., Ltd. (Shanghai, China). Chromatographic separation was achieved on an HSST3 column (100 mm × 2.1 mm i.d., 1.8 µm) with a column temperature of 40 °C. The mobile phases consisted of (A) water/acetonitrile (95:5, v/v) with 0.1% formic acid and (B) acetonitrile/isopropanol/water (47.5:47.5:5, v/v/v) with 0.1% formic acid. The flow rate was set to 0.40 mL/min. Mass spectrometry detection was carried out in both positive and negative ion modes with a scanning range of m/z 70–1050. The ion spray voltages were 3500 V (positive) and –3000 V (negative). Sheath gas and auxiliary gas were set to 50 arb and 13 arb, respectively; the ion transfer tube temperature was 450 °C; and collision energy was cycled at 20, 40, and 60 eV.

**Maize growth parameters measurement**

Three biologically uniform replicates per treatment were selected for analysis. Plant height was measured from the base to the highest natural point of the shoot; root length was measured from the base to the longest root tip. The fourth fully expanded leaf from the apex was used for photosynthetic measurements. Net photosynthetic rate (Pn) was measured between 9:30 and 11:30 AM using a portable gas exchange system (LI-6400 XT, LI-COR, USA) at 30 °C, 380 µmol·mol⁻¹ CO₂, and 37–42% relative humidity7. The actual quantum yield of photosystem II (ΦPSII = (Fm′ − F′)/Fm′) was determined using a Hansatech FMS 300 chlorophyll fluorometer8.

Leaf tissues were deveined, and roots were collected for vitality assessment. Rhizosphere soil was sampled within 2 mm of the root surface, carefully removing root fragments, and stored at 4 °C and 28 °C for enzyme activity and metagenomic analyses, respectively. All samples for biomass, physiological indices, soil properties, and metagenomics were processed in parallel with one-to-one correspondence for subsequent correlation analysis.

Leaf and root samples (0.5 g) were homogenized in an ice-cold mortar with 10 mL of 50 mM sodium phosphate buffer (pH 7.8). The homogenate was centrifuged at 10,000 rpm for 10 minutes at 4 °C. The supernatant was collected as a crude enzyme extract for assays of soluble protein9, malondialdehyde (MDA)10, and proline content11. Soluble sugar content in leaves and roots was determined using the anthrone method, and chlorophyll content was measured according to Ni et al. (2009)12. Root activity was assessed using the triphenyl tetrazolium chloride (TTC) reduction method.

Soil enzyme activities, including *β*-galactosidase, *α*-glucosidase, *β*-glucosidase, phosphatase, and urease, were measured colorimetrically. Protease and dehydrogenase activities were determined using modified ninhydrin and triphenyl tetrazolium chloride methods, respectively. MDA content was quantified according to Heath and Packer (1968).

**Metagenomic Analysis**

Genomic DNA was extracted using the FastPure Stool DNA Isolation Kit (Magnetic bead) (MJYH, Shanghai, China). DNA concentration and purity were assessed spectrophotometrically, and integrity was evaluated via 1% agarose gel electrophoresis. The DNA was fragmented using a Covaris M220 system (Geneco, China) to an average size of ~350 bp for paired-end (PE) library construction.

**Reference**

1. Xuan, F. et al. Mapping crop type in Northeast China during 2013–2021 using automatic sampling and tile-based image classification. *Int. J. Appl. Earth ObS.* 117 (2023).
2. Fang, H. Y., Sun, L. Y., Qi, D. L. & Cai, Q. G. Using 137Cs technique to quantify soil erosion and deposition rates in an agricultural catchment in the black soil region, Northeast China, *Geomorphology* **169-170**, 142-150 (2012).
3. Xu, X. Z., Xu, Y., Chen, S. C., Xu, S. G. & Zhang, H. W. Soil loss and conservation in the black soil region of Northeast China: a retrospective study. *Environ. Sci. Policy* **13(8)**, 793-800 (2010).
4. Zhang, Y. et al. SynCom-mediated herbicide degradation activates microbial carbon metabolism in soils. *iMeta* e70058 (2025).
5. Zhang, Y., Xu, Q., Wang, G. & Shi, K. Mixed *Enterobacter* and *Klebsiella* bacteria enhance soybean biological nitrogen fixation ability when combined with rhizobia inoculation. *Soil Biol. Biochem.* **184**, 109100 (2023).
6. Zhang, Y., Xu, Z., Chen, Z. & Wang, G. Simultaneous degradation of triazophos, methamidophos and carbofuran pesticides in wastewater using an *Enterobacter* bacterial bioreactor and analysis of toxicity and biosafety. *Chemosphere* **261**, 128054 (2020).
7. Nounjan, N., Siangliw, J. L., Toojinda, T., Chadchawan, S. & Theerakulpisut, P. Salt-responsive mechanisms in chromosome segment substitution lines of rice (*Oryza sativa L*. cv. KDML105). *Plant Physiol. Biochem.* **103**, 96–105 (2016).
8. Genty, B., Briantais, J. M. & Baker, N. R. The relationship between quantum yield of photosynthetic electron transport and quenching of chlorophyll fluorescence. *Biochim. Biophys. Acta* **990**, 87–92 (1989).
9. Bradford, M. M. A rapid and sensitive method for the quantitation microgram quantities of protein utilizing the principle of protein-dye binding. *Anal. Biochem.* **72**, 248–254 (1976).
10. Heath, R. L. & Packer, L. Photoperoxidation in isolated chloroplasts. l. Kinetics and stoichiometry of fatty acid peroxidation. *Arch. Biochem. Biophys.* **125**, 189–198 (1968).
11. Bates, L. S., Waldren, R. P. & Teare, I. D. Rapid determination of free proline for water-stress studies. *Plant Soil* **39**, 205–207 (1973).
12. Ni, Z., Kim, E. D. & Chen, Z. J. Chlorophyll and starch assays. *Protoc. Exch. Nature* 12 (2009).


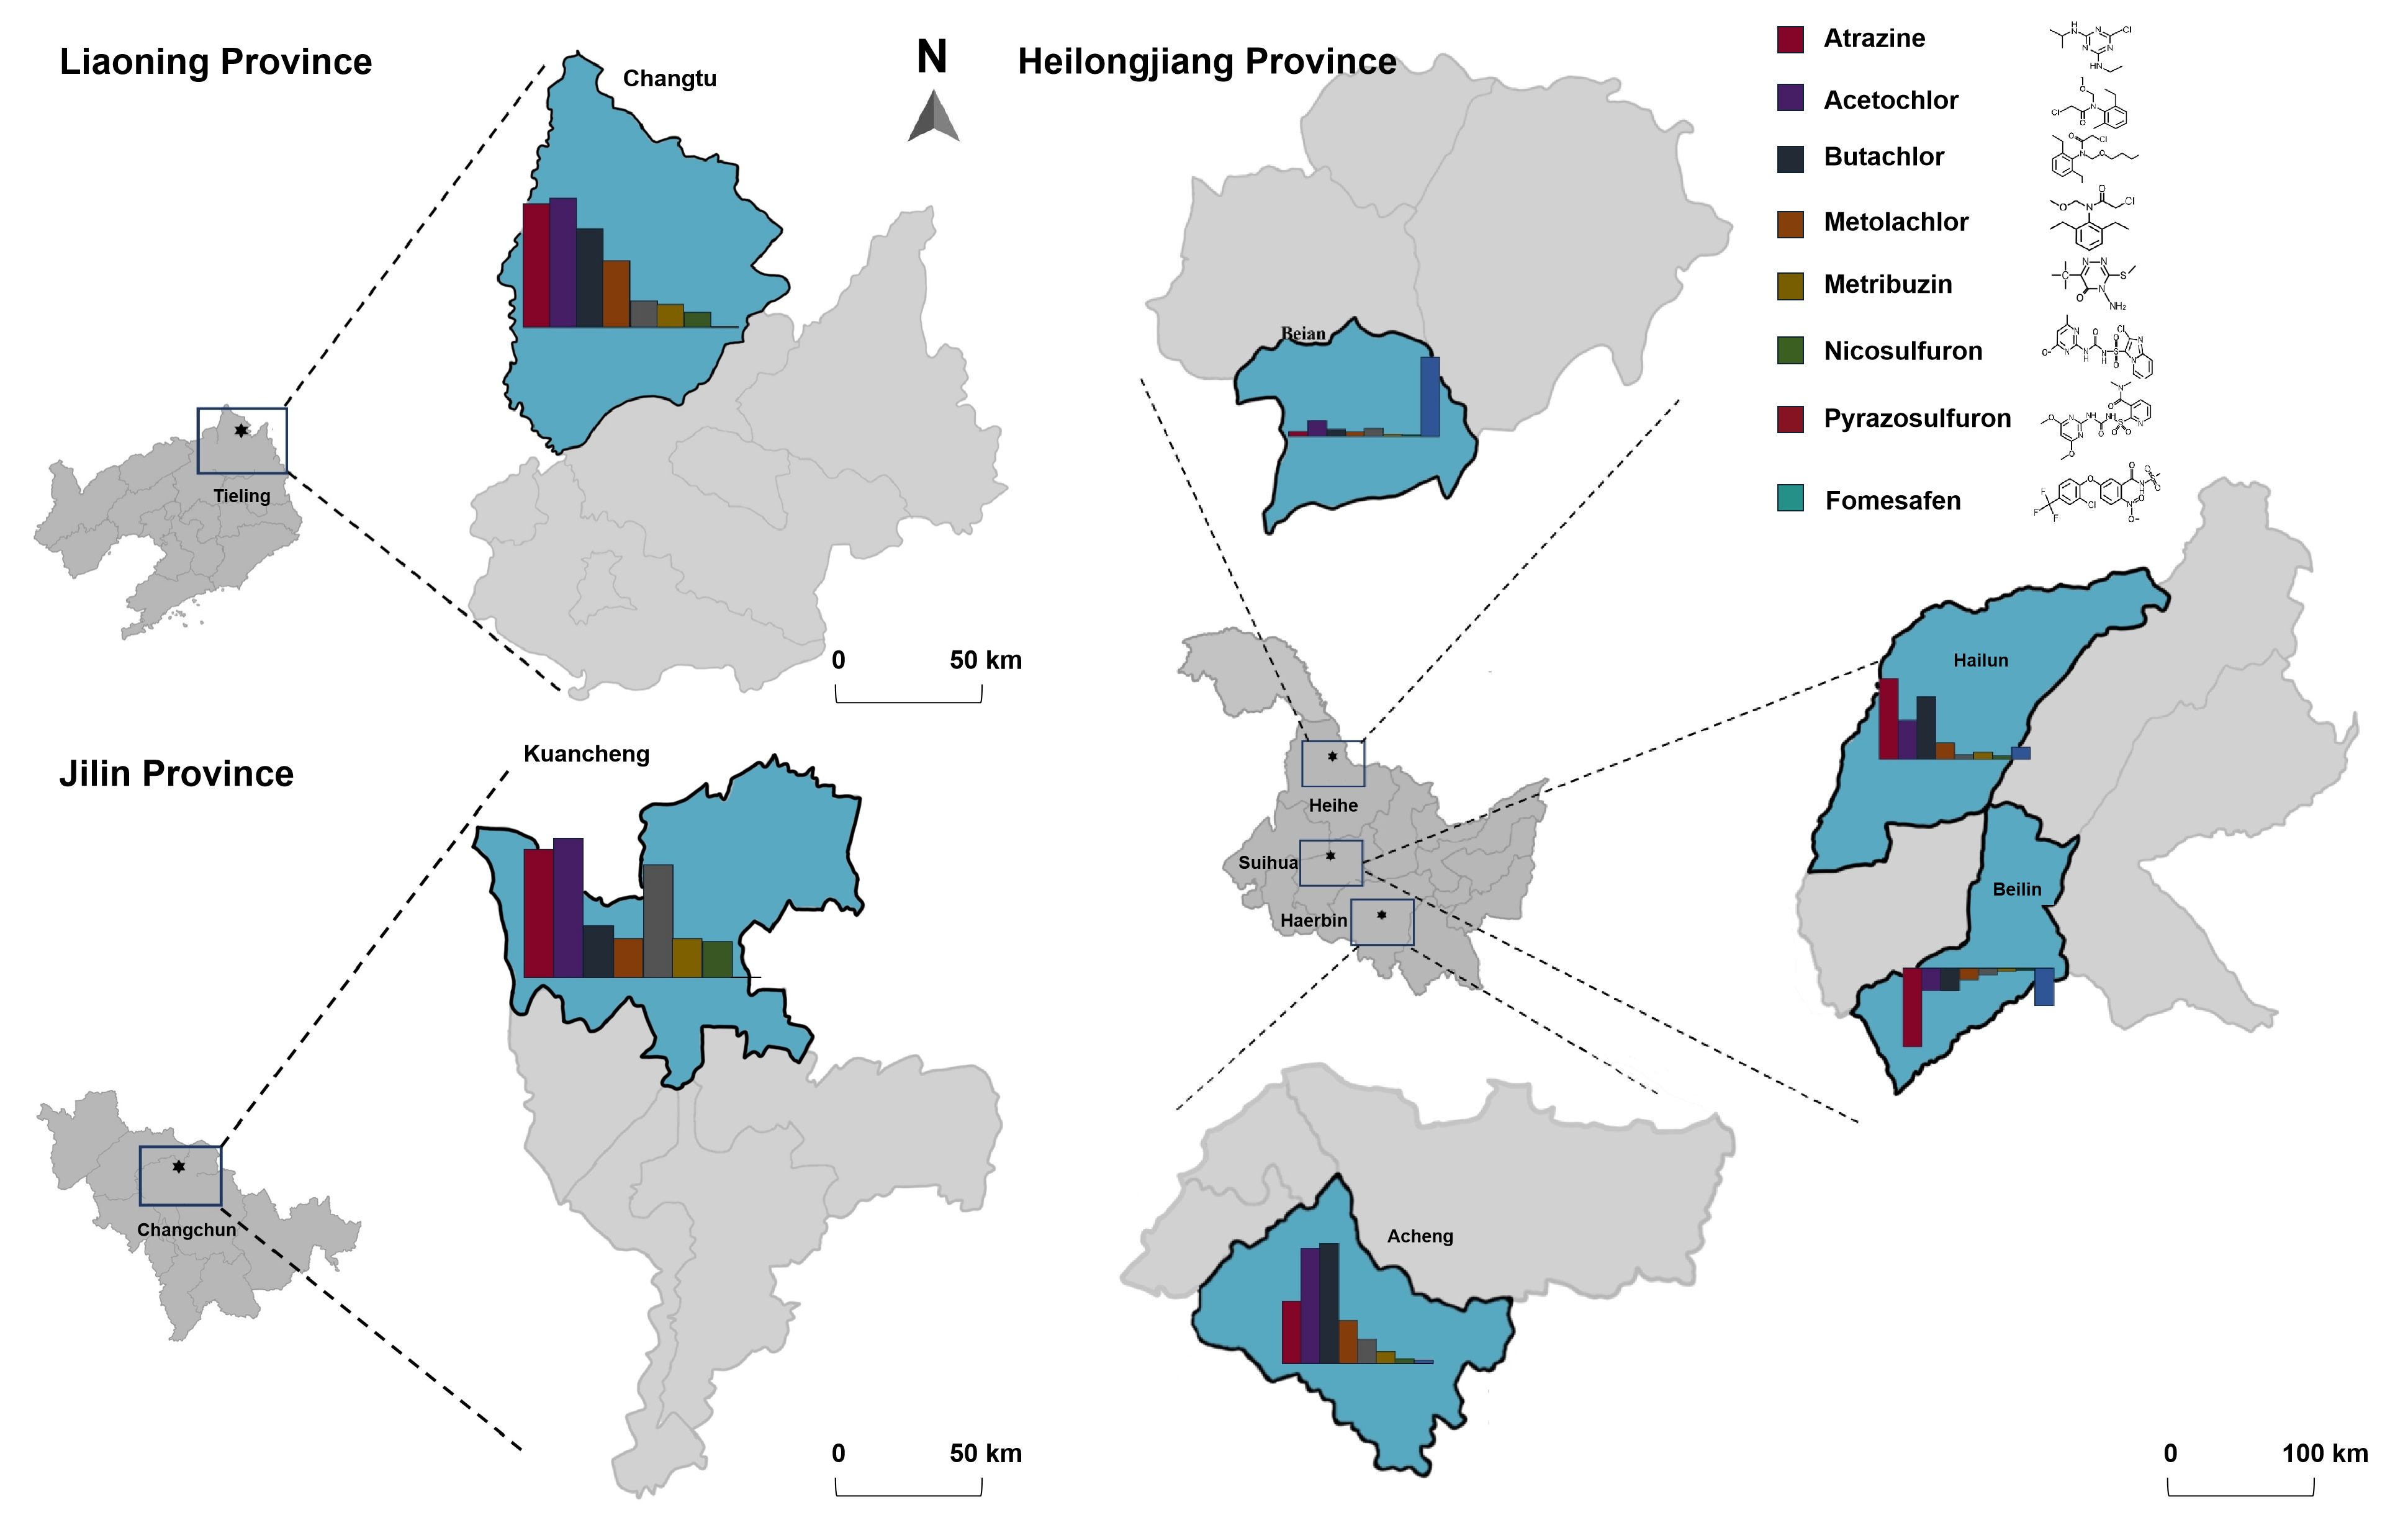


Figure S1 Map of soil sample collection sites and distribution of herbicide residues.


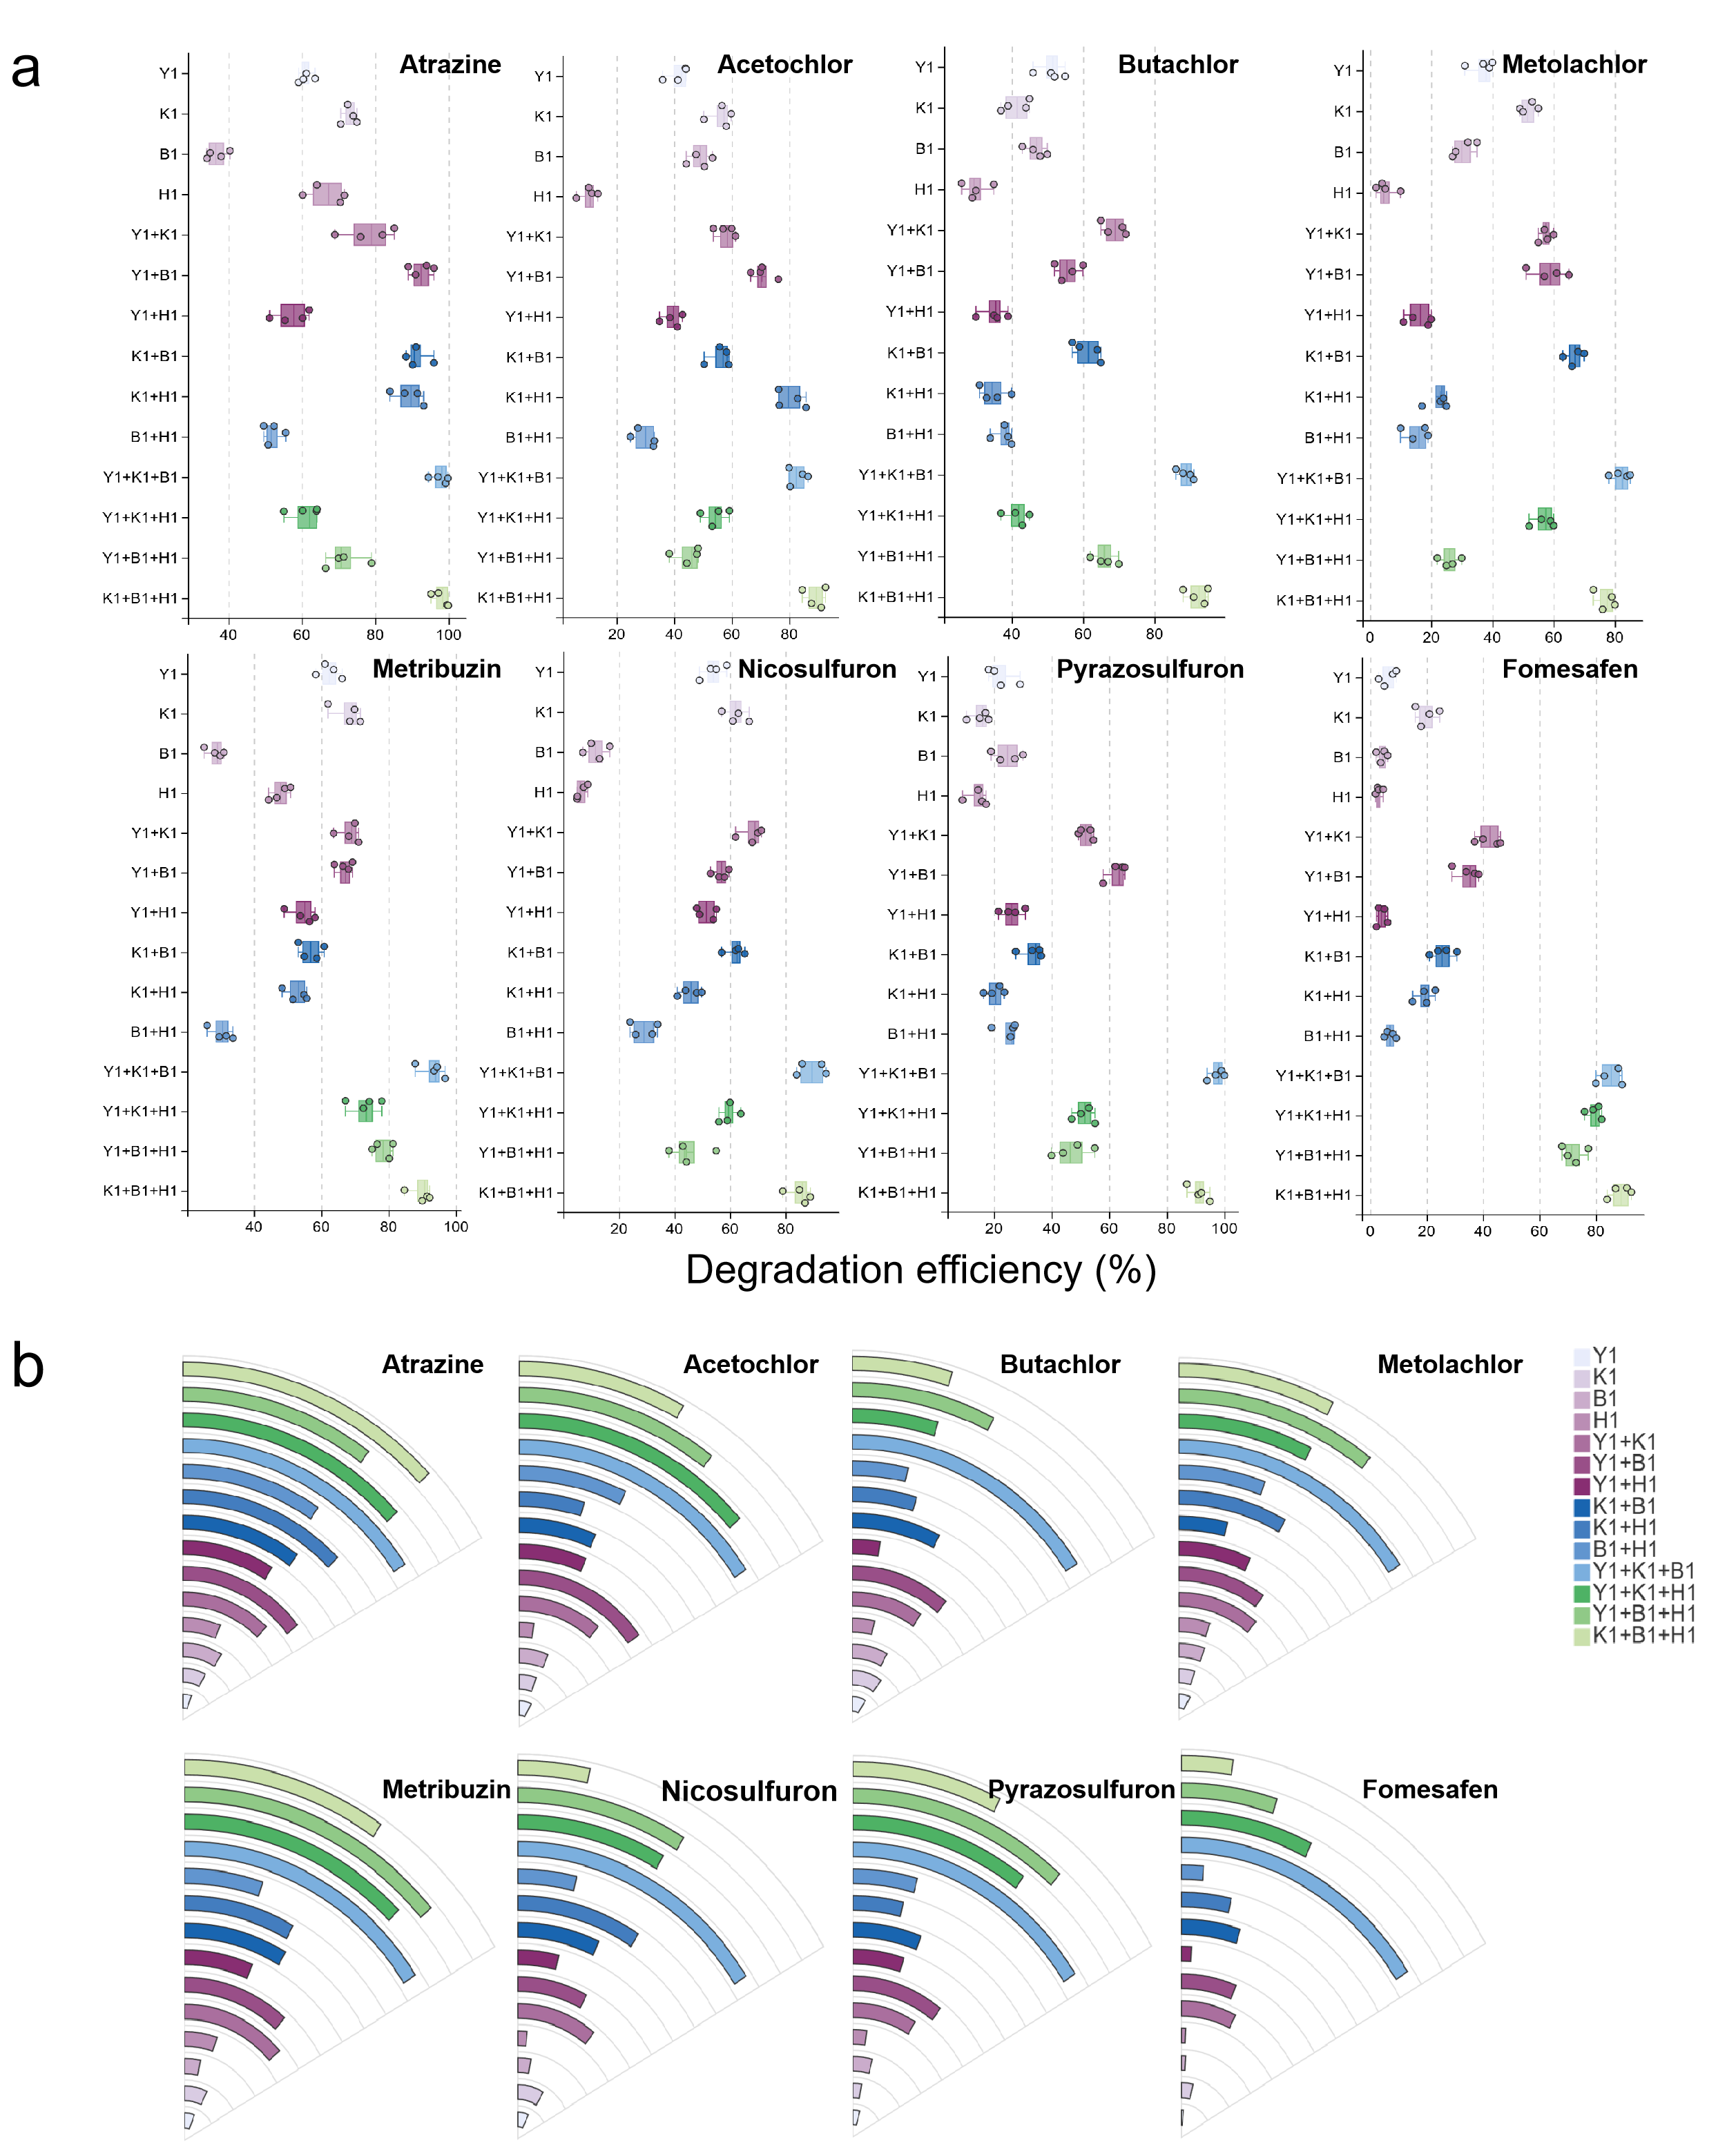


Figure S2 Degradation capabilities (a) and resistances (MICs)(b) for 8 herbicides by individual strains and SynComs.


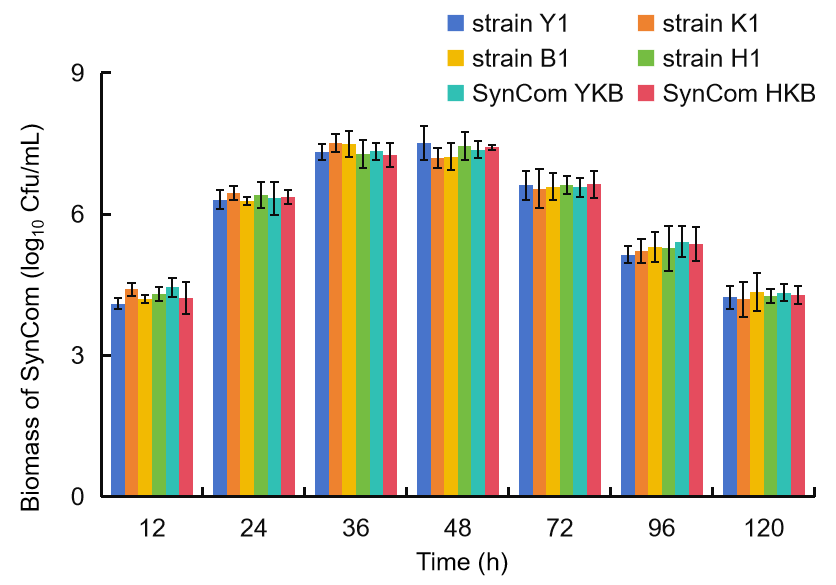


Figure S3 Overall biomass levels in monocultures and SynComs systems.


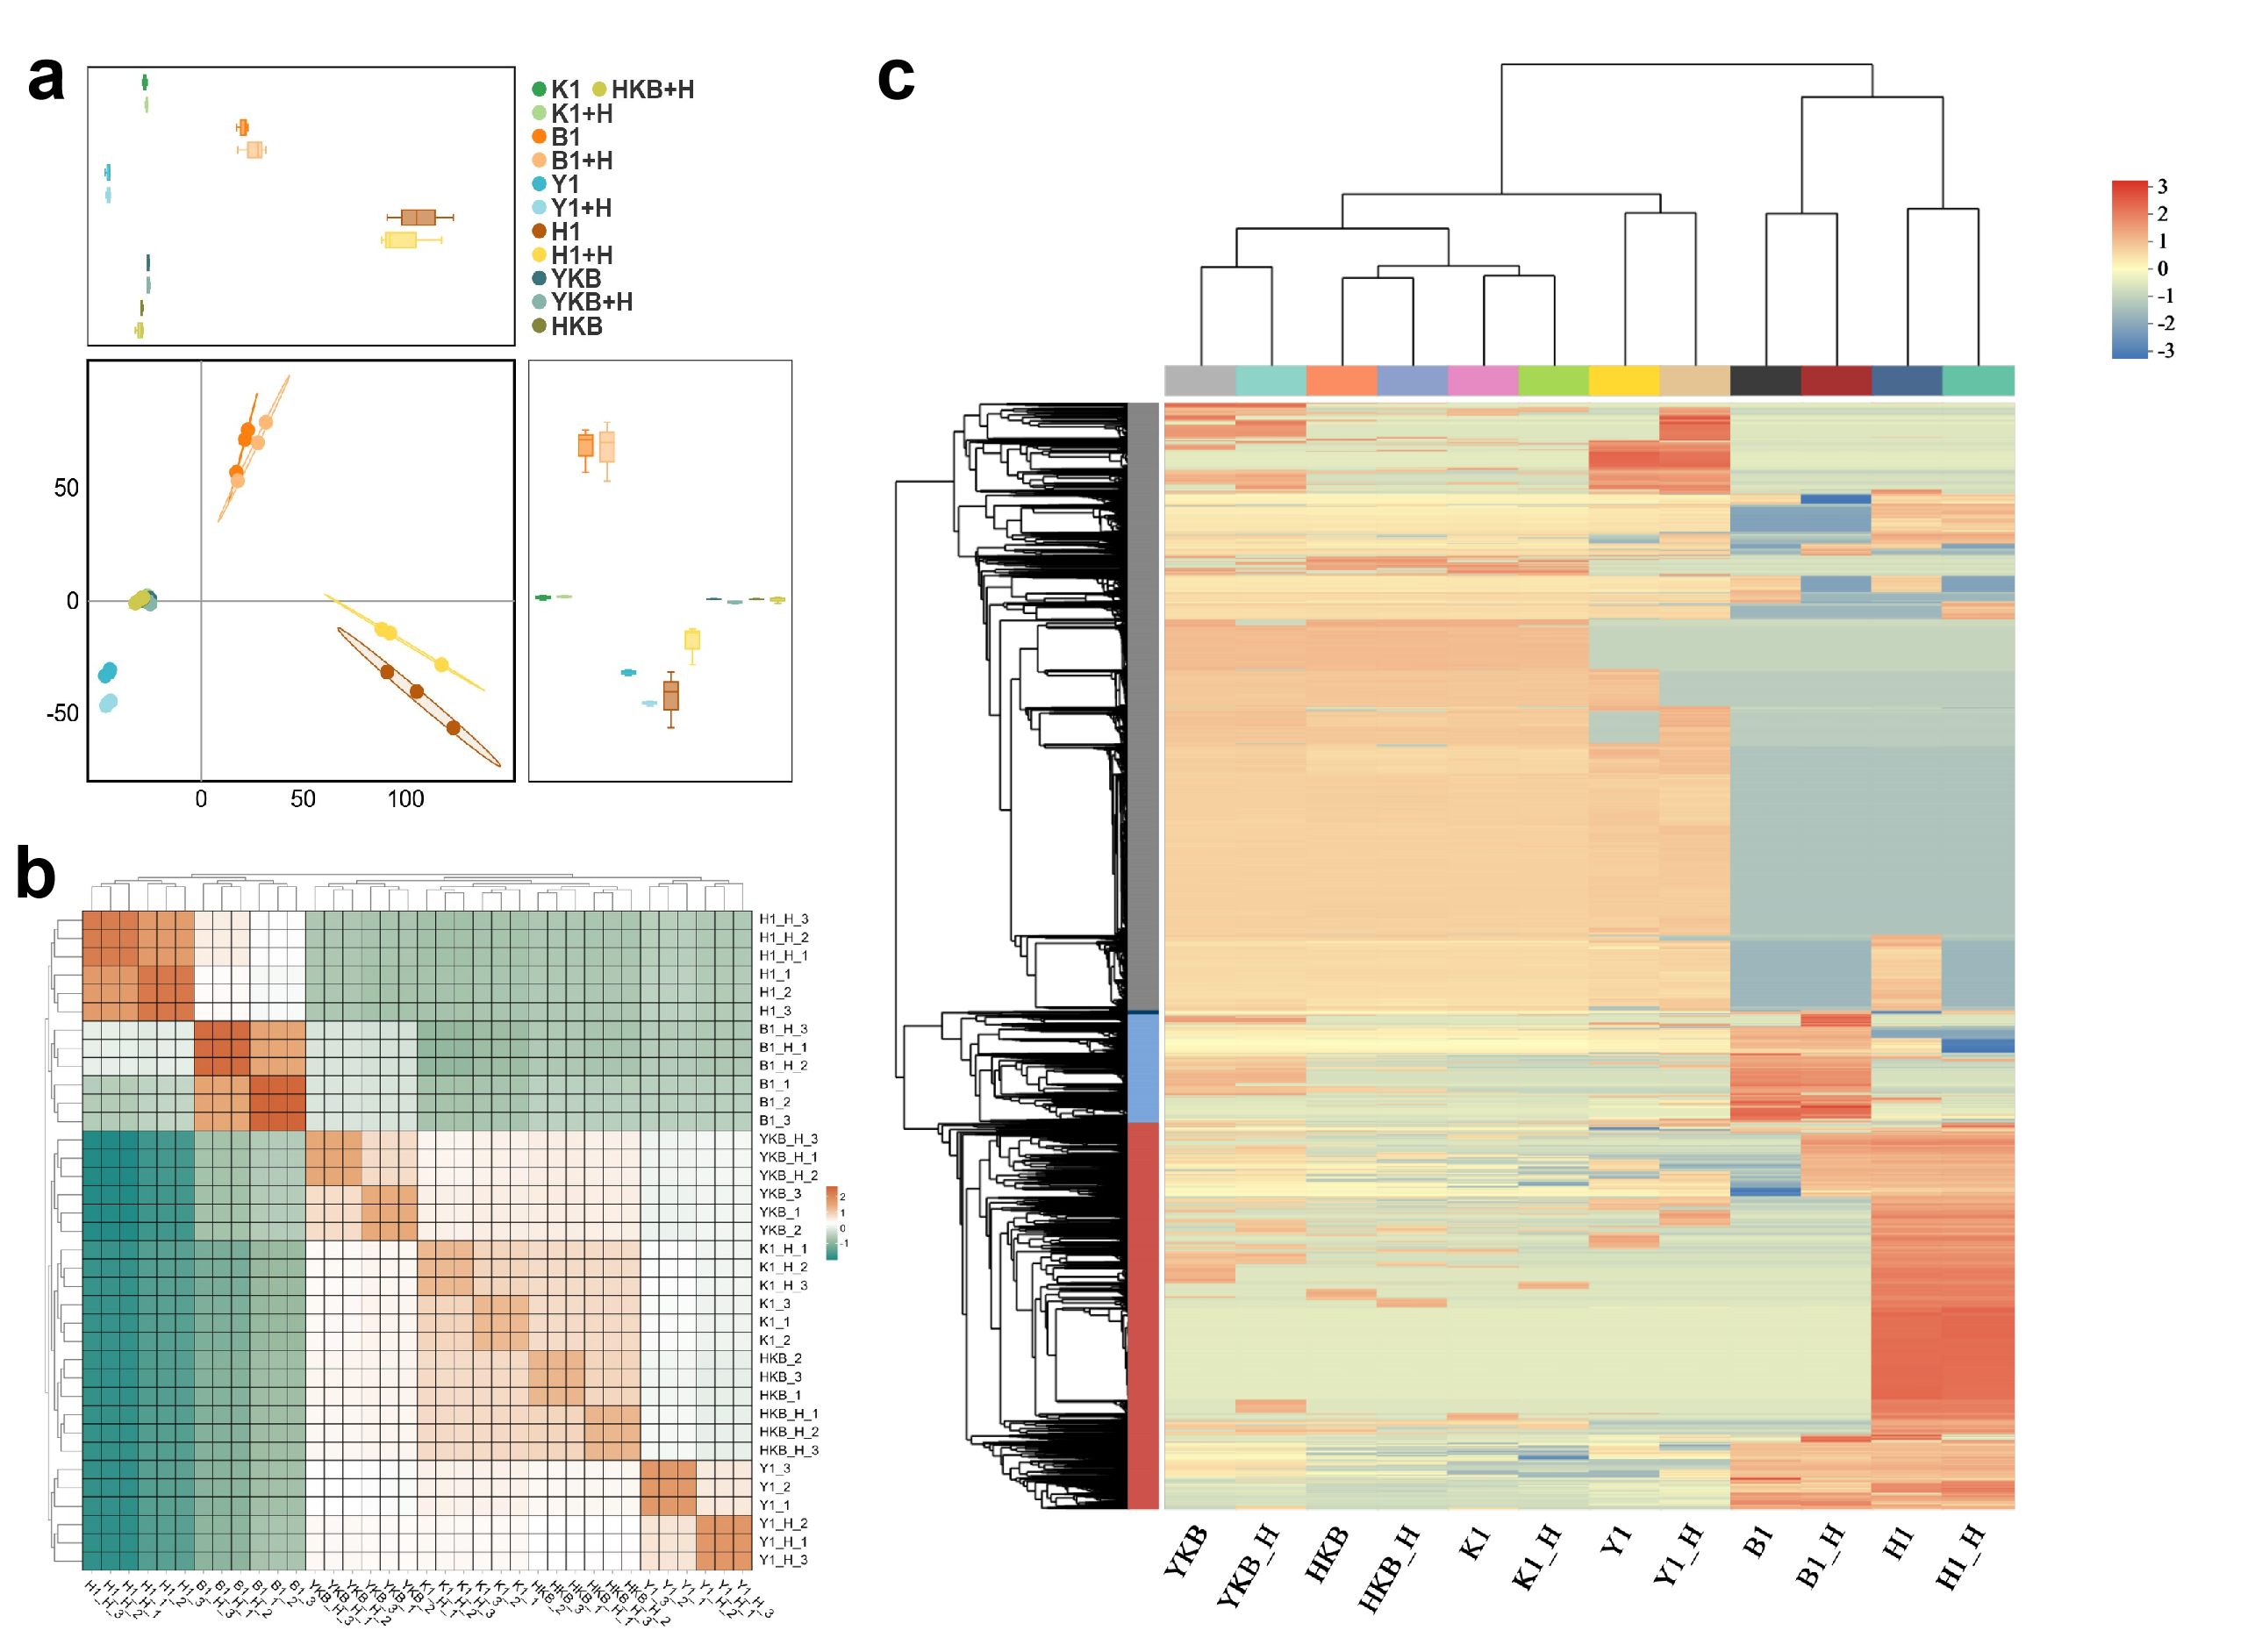


Figure S4 Comparative proteomic analysis of treatment groups. (a) The similarity among samples by principal component analysis (PCA). Closer proximity indicates higher similarity. (b) Pairwise correlation matrix between samples. Each cell represents the correlation coefficient between two samples, with color intensity denoting the strength of correlation. (c) Hierarchical clustering of protein expression patterns. Each column represents a treatment group, and each row represents individual proteins. The color scale reflects relative expression levels of proteins within each group. The left dendrogram shows protein clustering: shorter branches indicate similar expression patterns. The top dendrogram shows sample clustering: shorter branches denote similar proteomic profiles across all proteins.


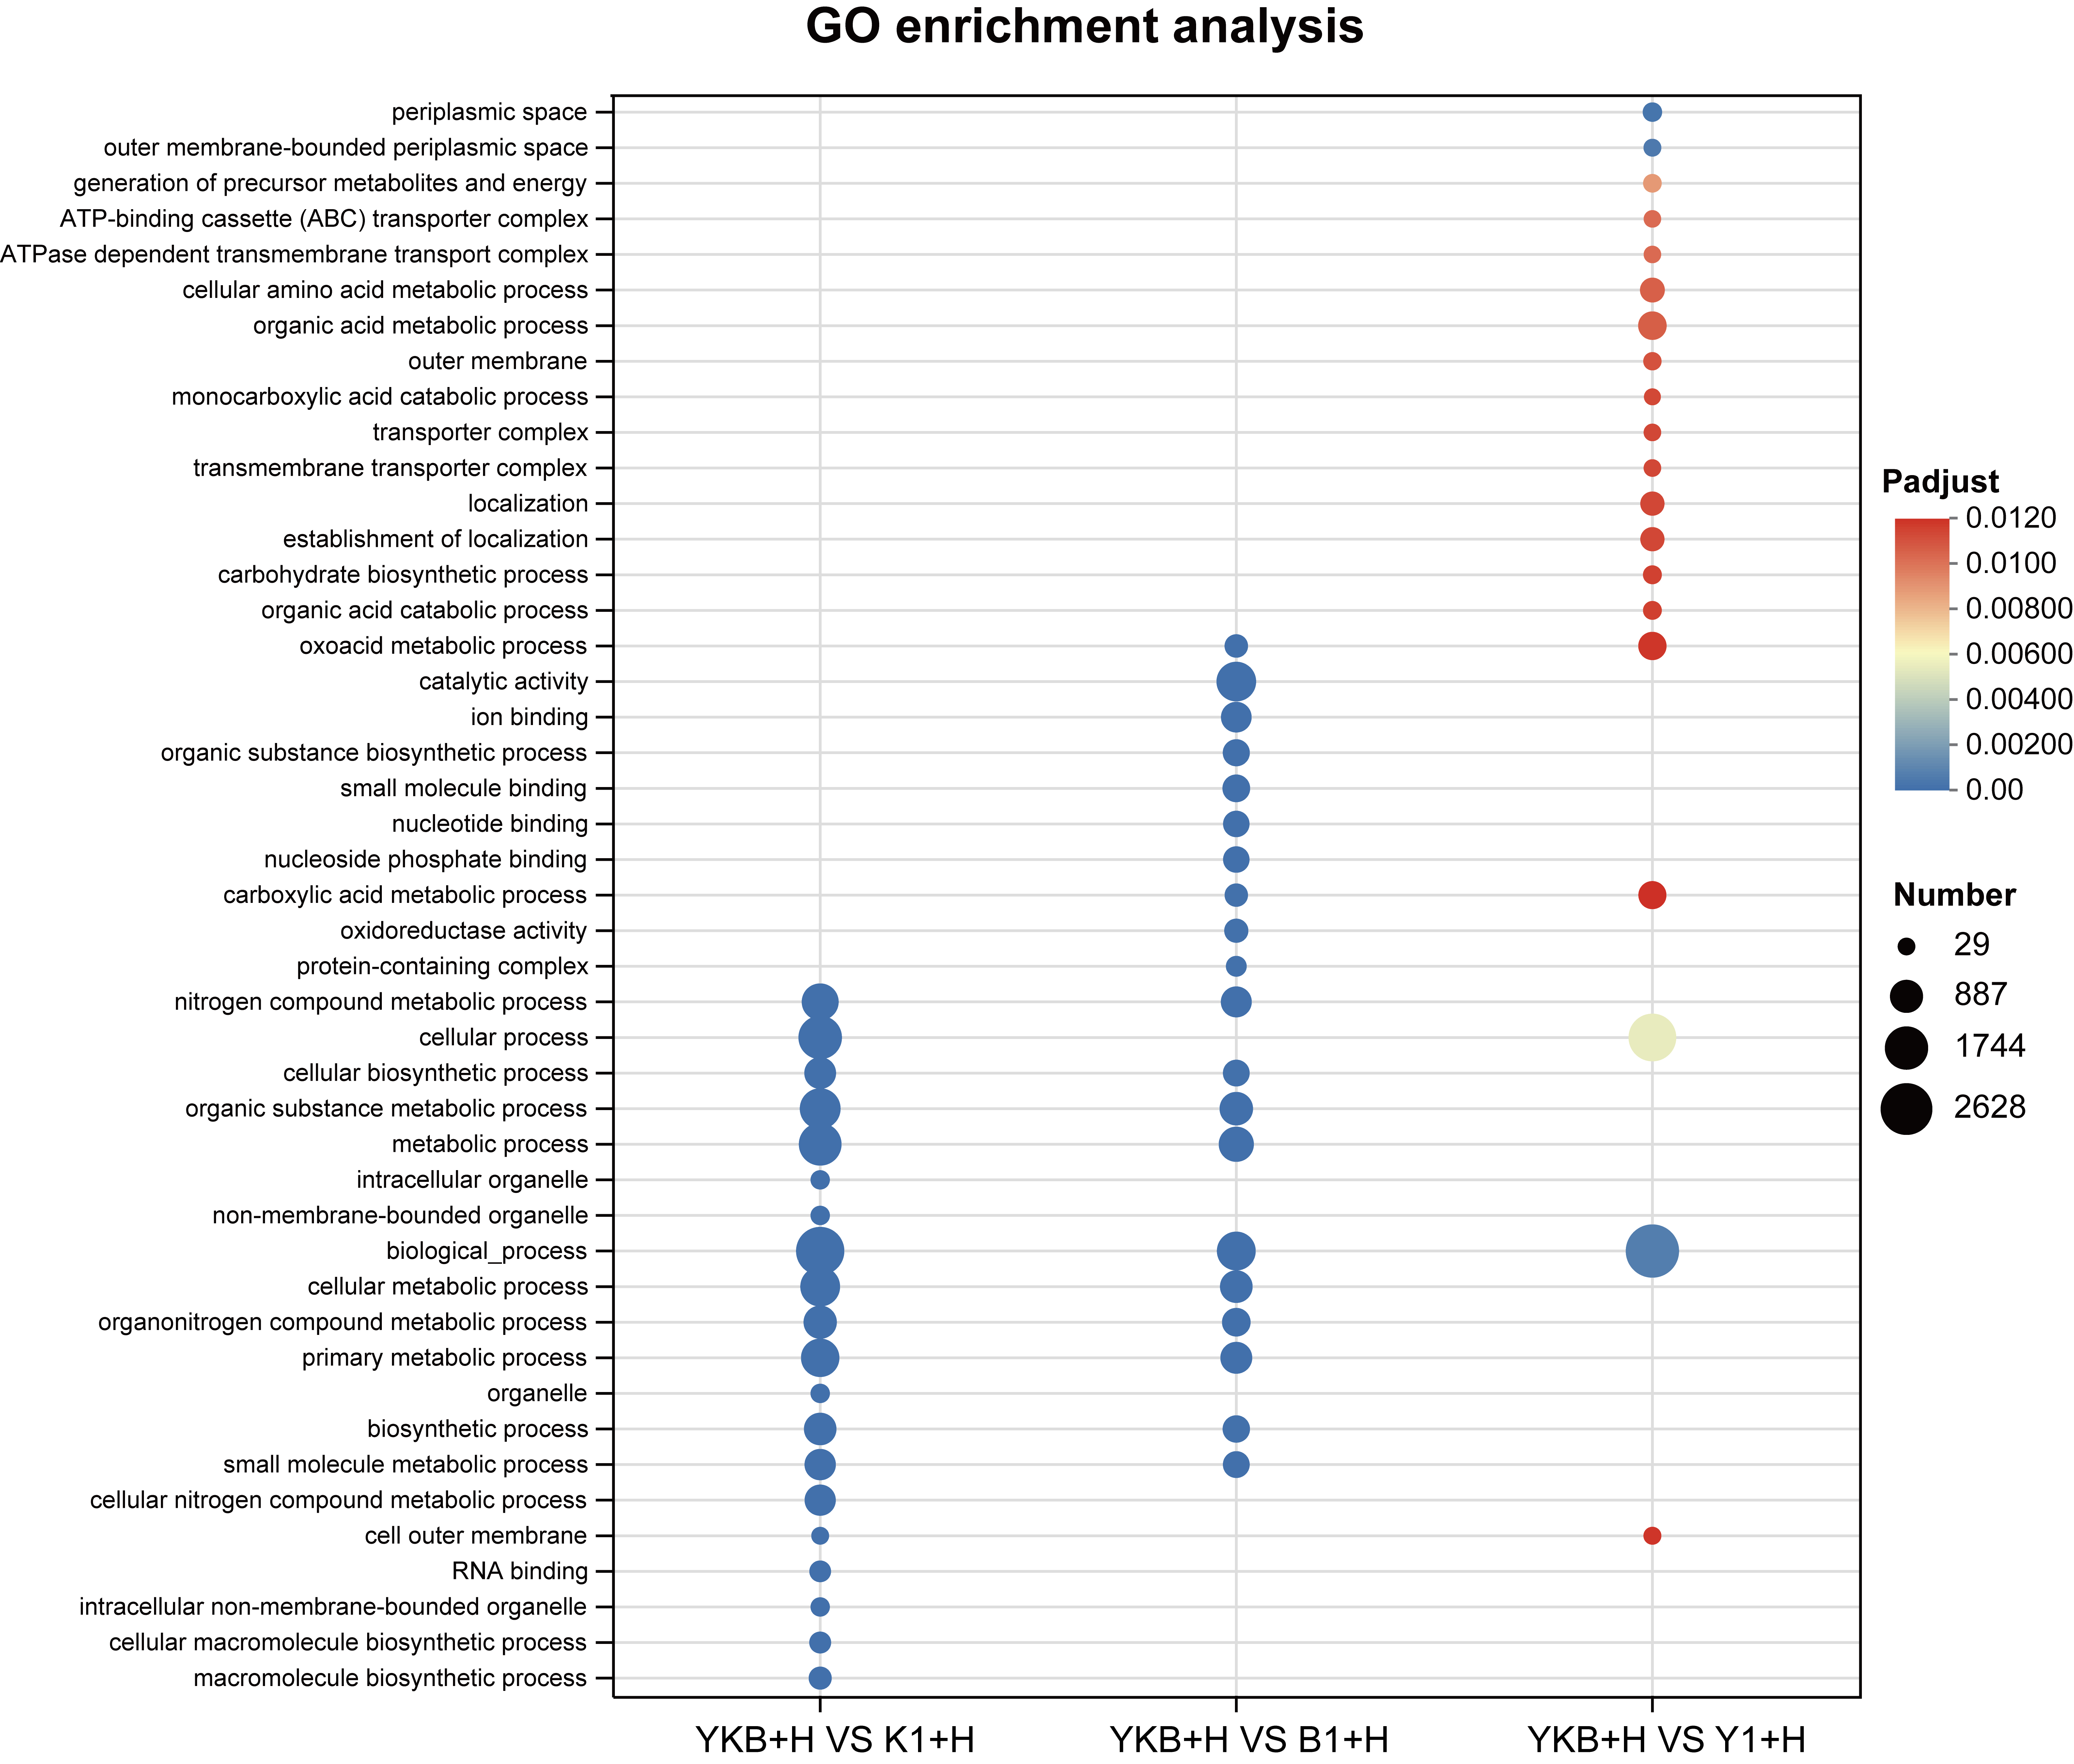


Figure S5 Protein GO enrichment analysis of SynCom YKB and monocultures under the exposure of herbicides.


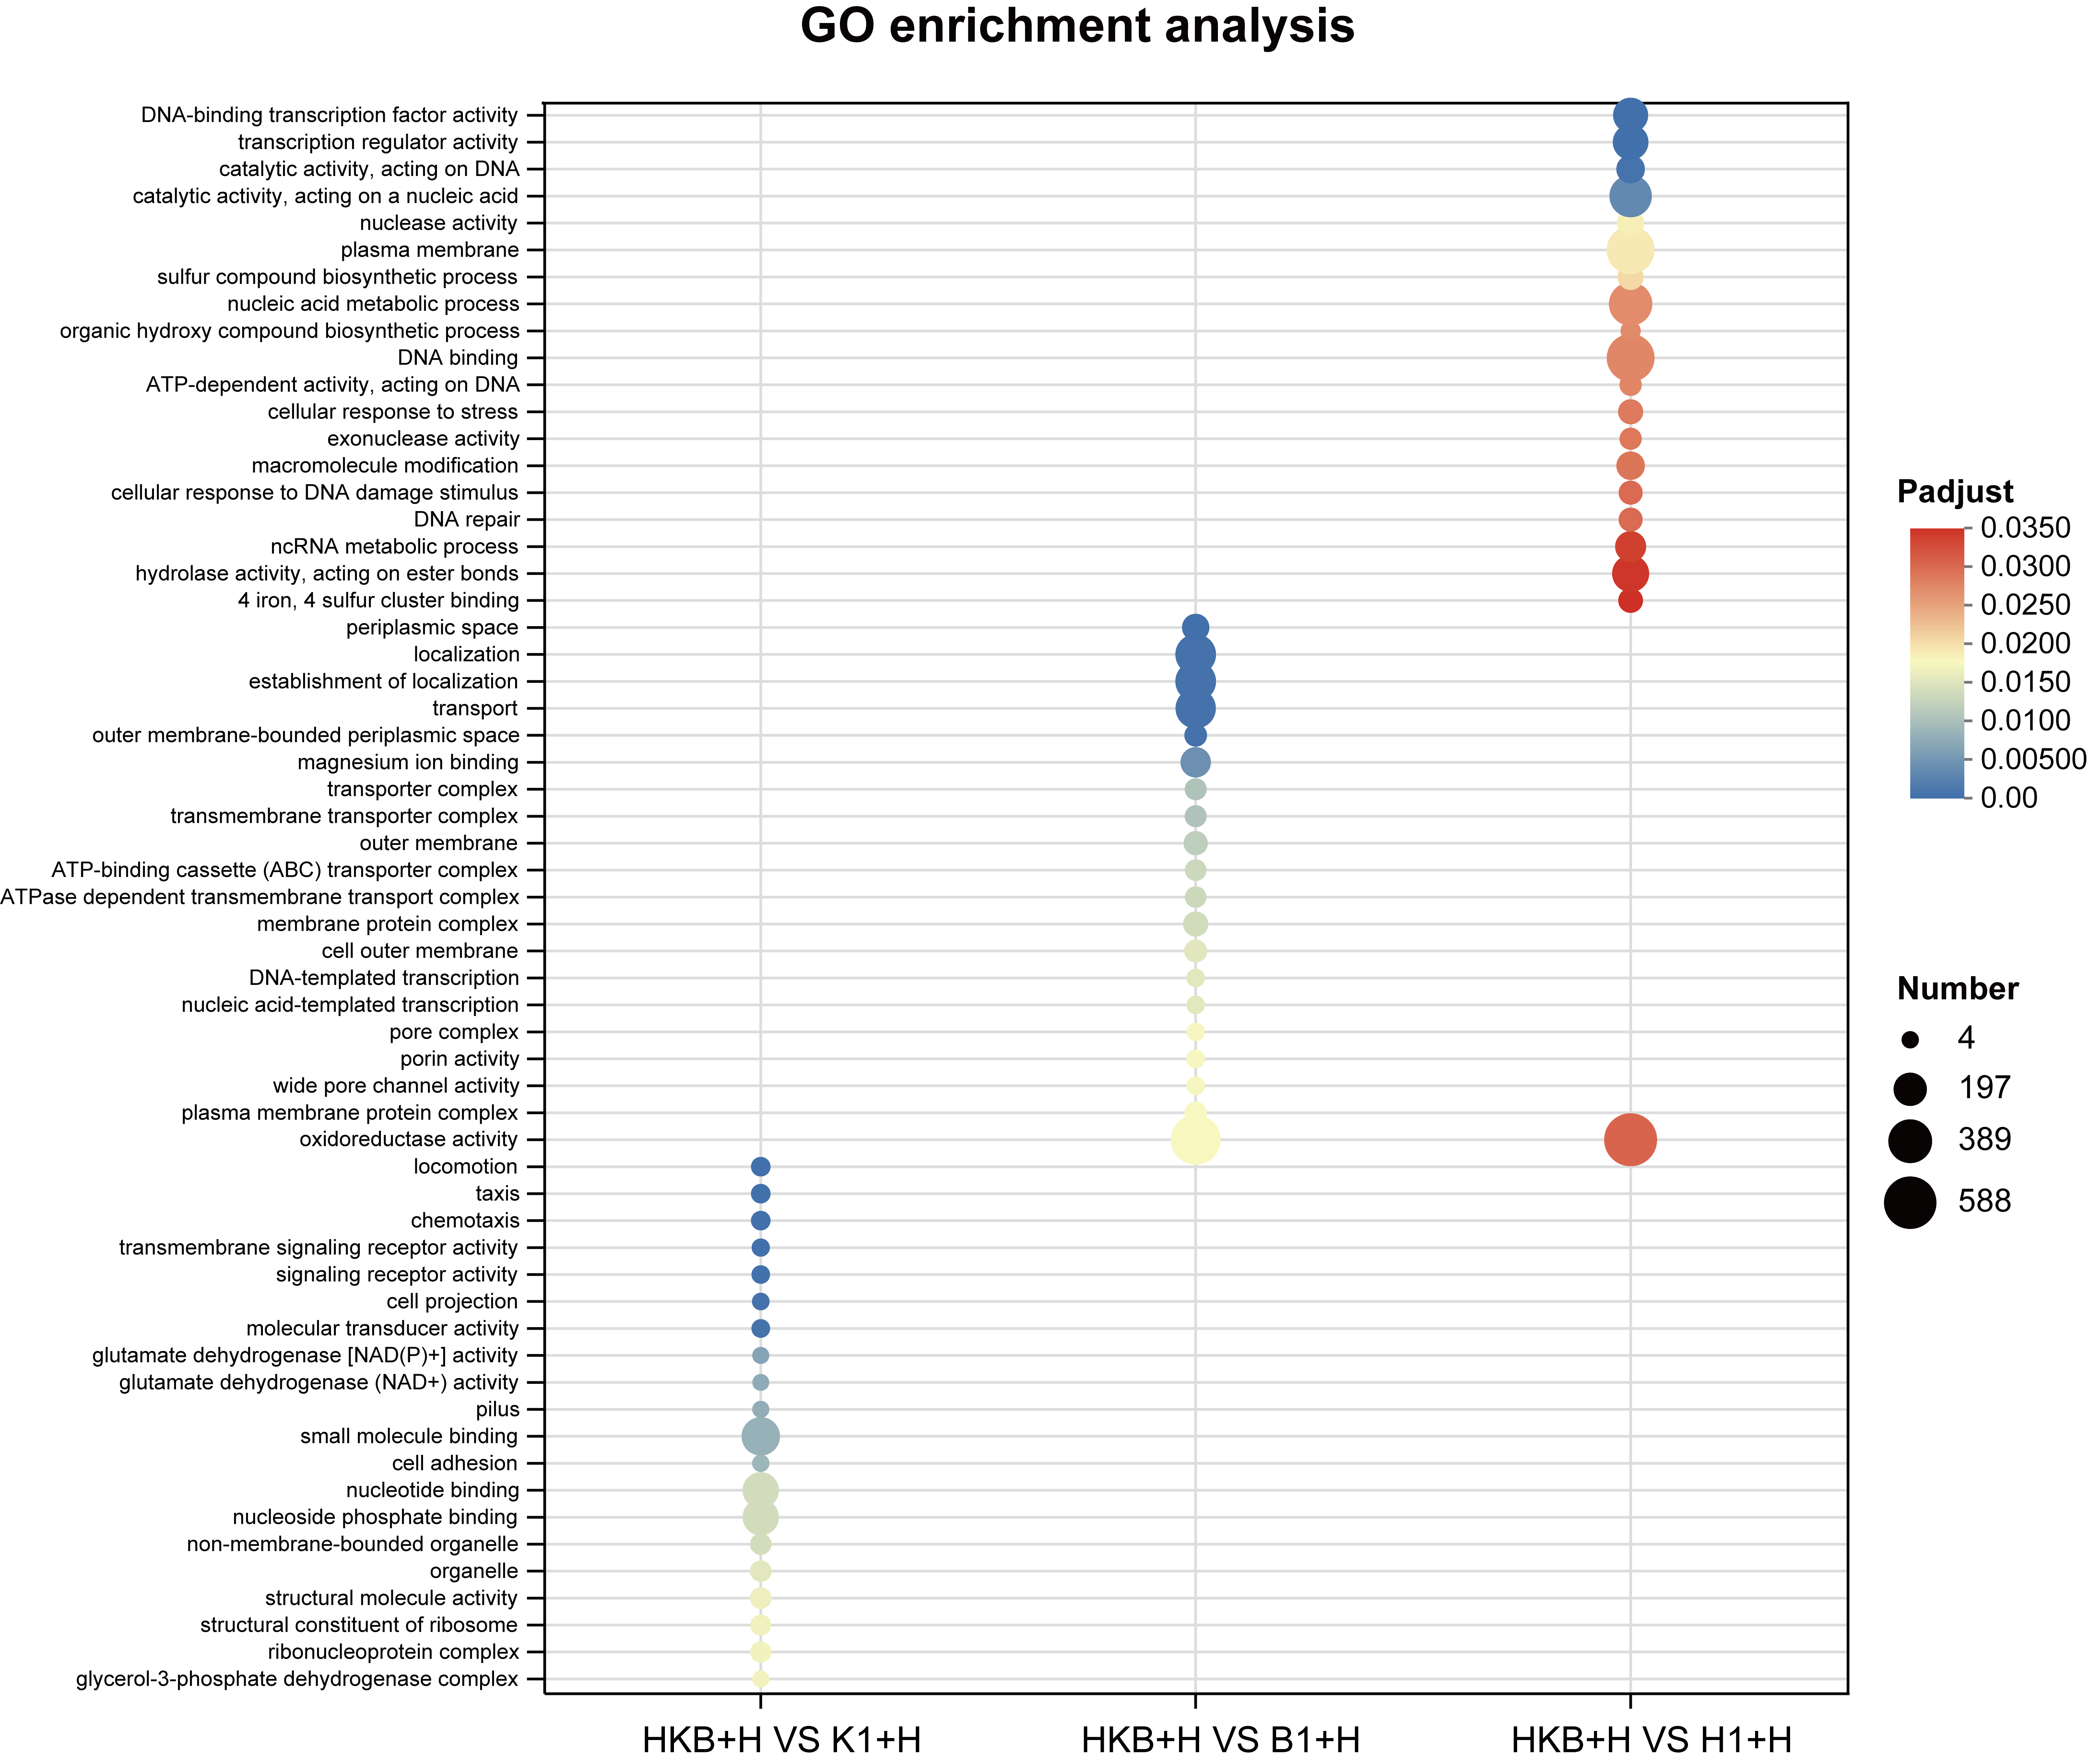


Figure S6 Protein GO enrichment analysis of SynCom HKB and monocultures under the exposure of herbicides.


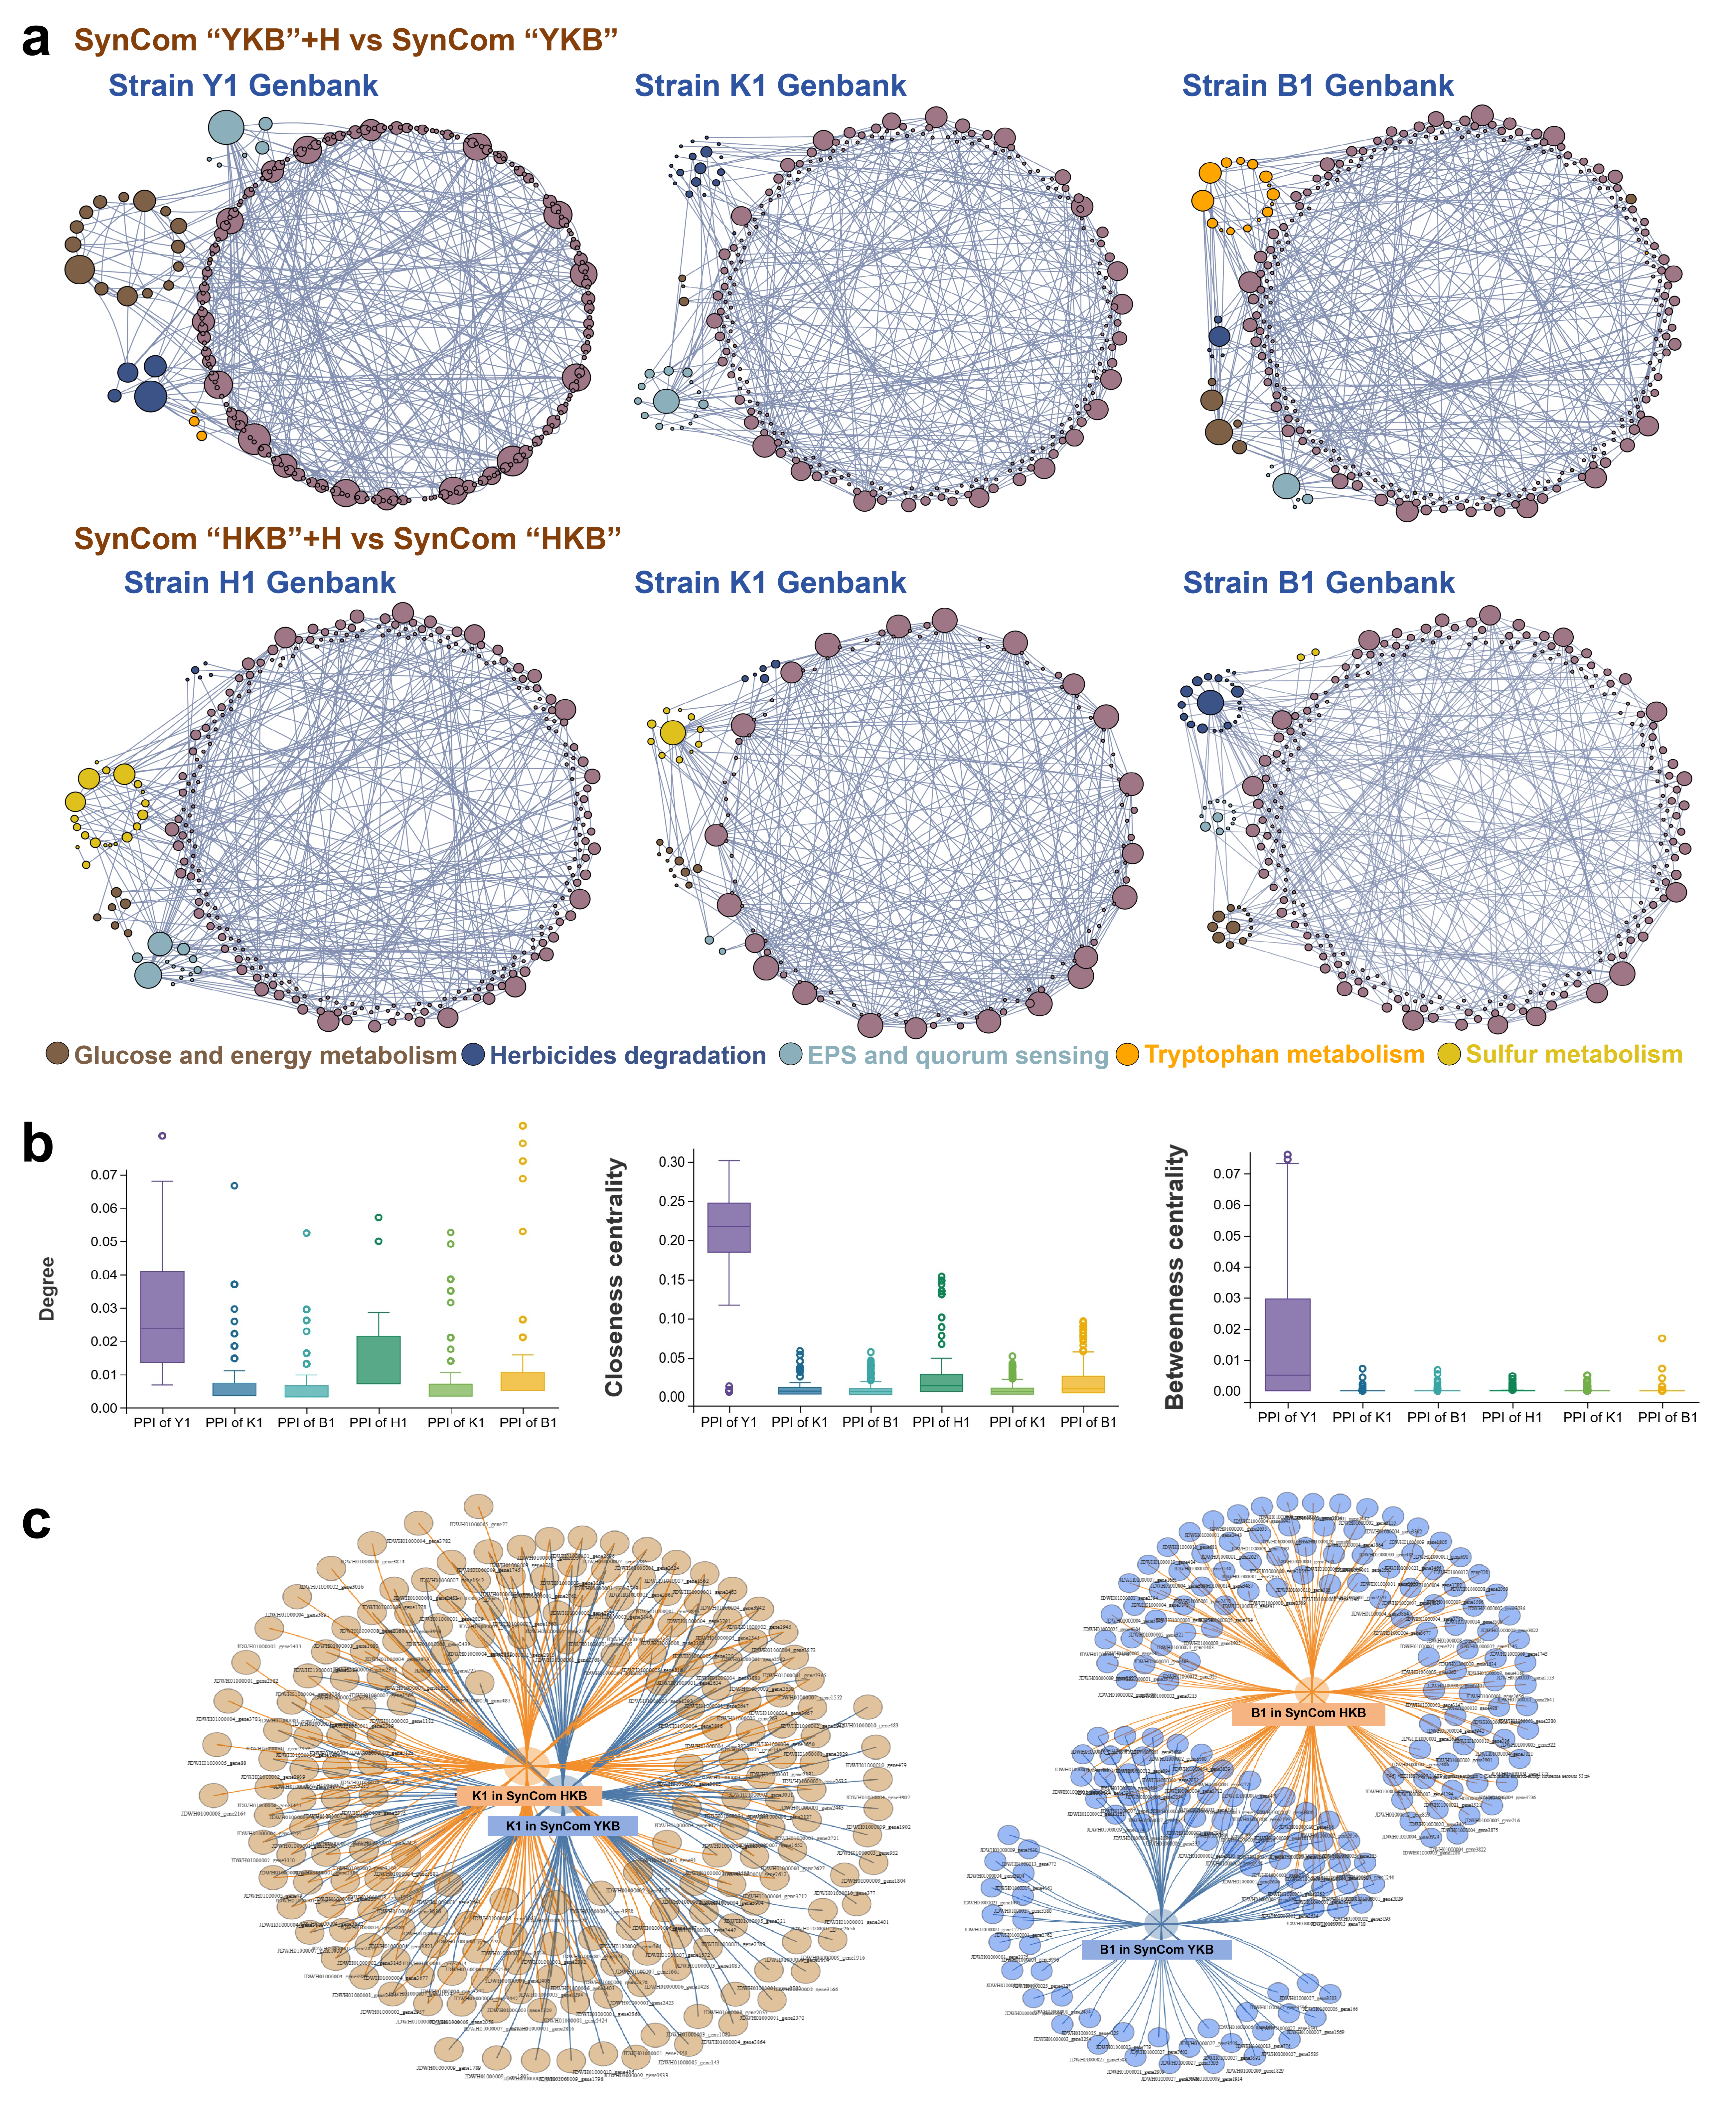


Figure S7 Enriched protein interaction networks in SynComs members exposed to herbicides. (a) Protein-protein interaction (PPI) networks of members exposed to herbicides. Nodes represent enriched proteins, and edges represent protein interactions. Node size scales proportionally to its degree centrality, where larger nodes indicate higher functional importance. (b) Unique node-level topological features of the different networks, specifically the degree, betweenness, and closeness centrality. (c) Differences and similarities in the enriched proteins annotated by strains K1 and B1 in the two SynComs systems.


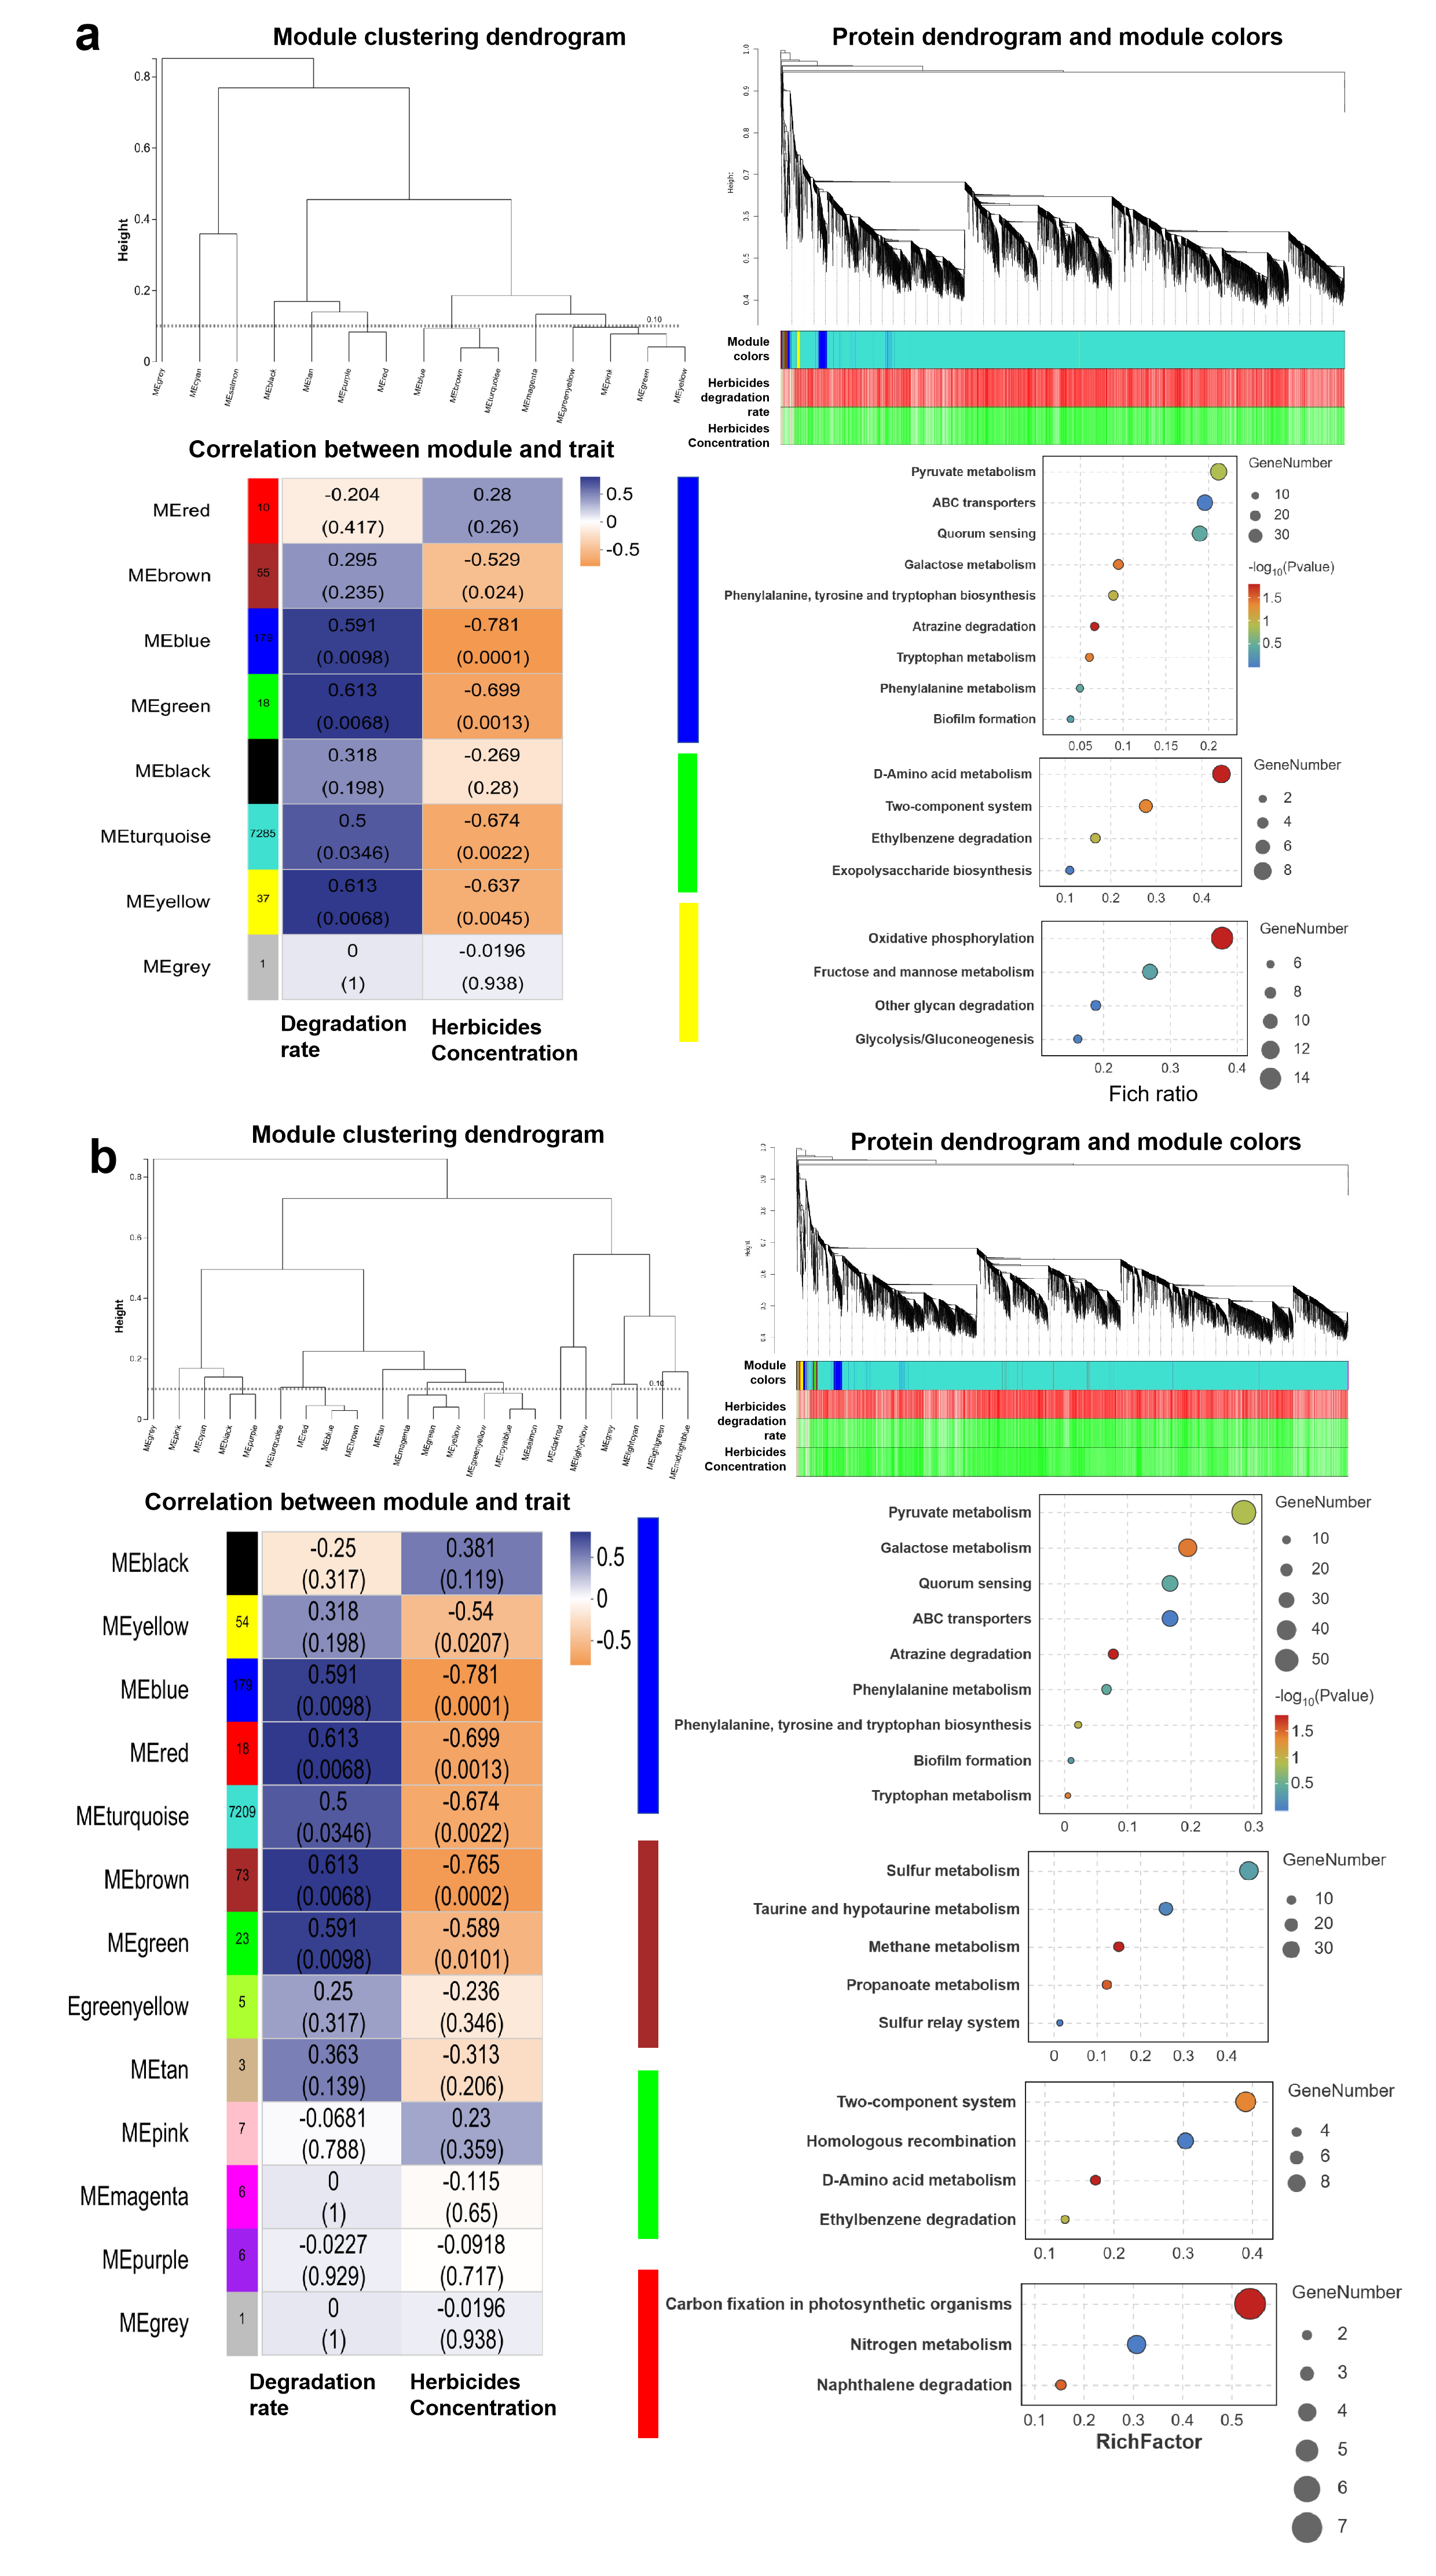


Figure S8 Weighted gene co-expression network analysis (WGCNA) of SynComs YKB (a) and HKB (b). Correlation coefficients were calculated using the Spearman method, and the top 30 nodes with the highest connectivity within each module were selected for analysis. Modules significantly positively correlated with herbicide degradation ability were selected for KEGG enrichment analysis.


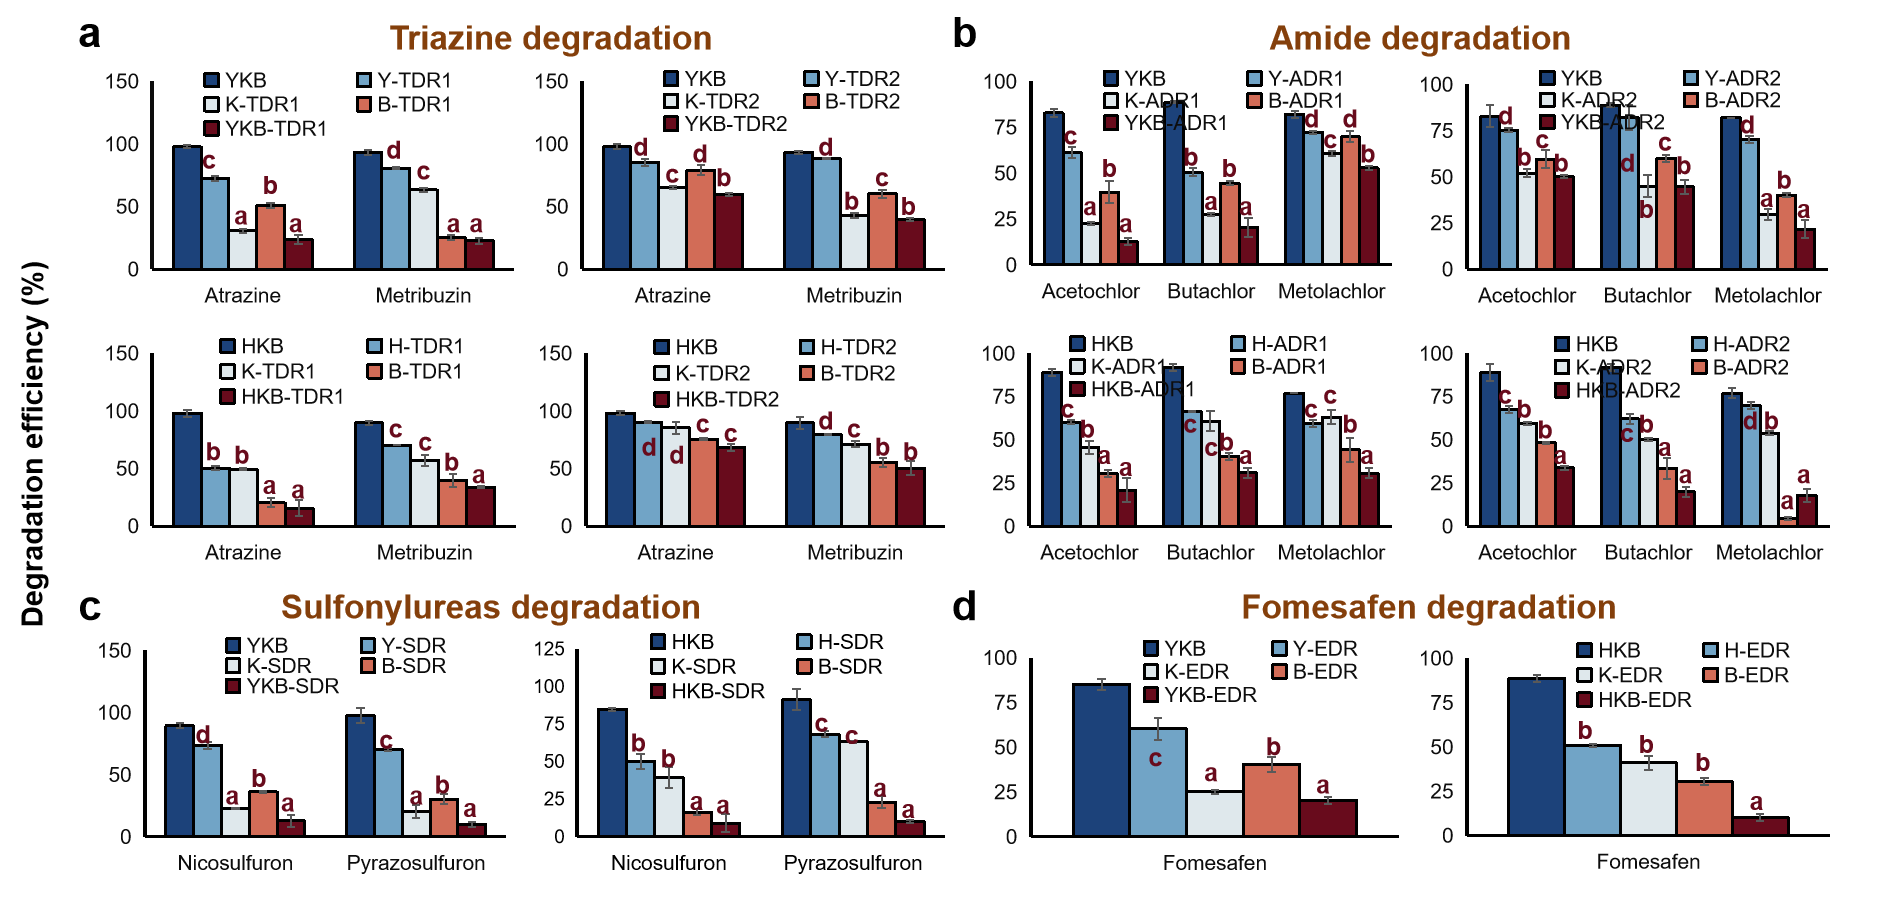


Figure S9 Impact of herbicide-degradation genes interference on herbicide degradation efficiencies in SynComs system. YKB and HKB: Control group. Y-R: interference key genes on strain Y1. K-R: interference key genes on strain K1. B-R: interference key genes on strain B1. H-R: interference key genes on strain H1. YKB-R: interference key genes on all members. HKB-R: interference key genes on all members.


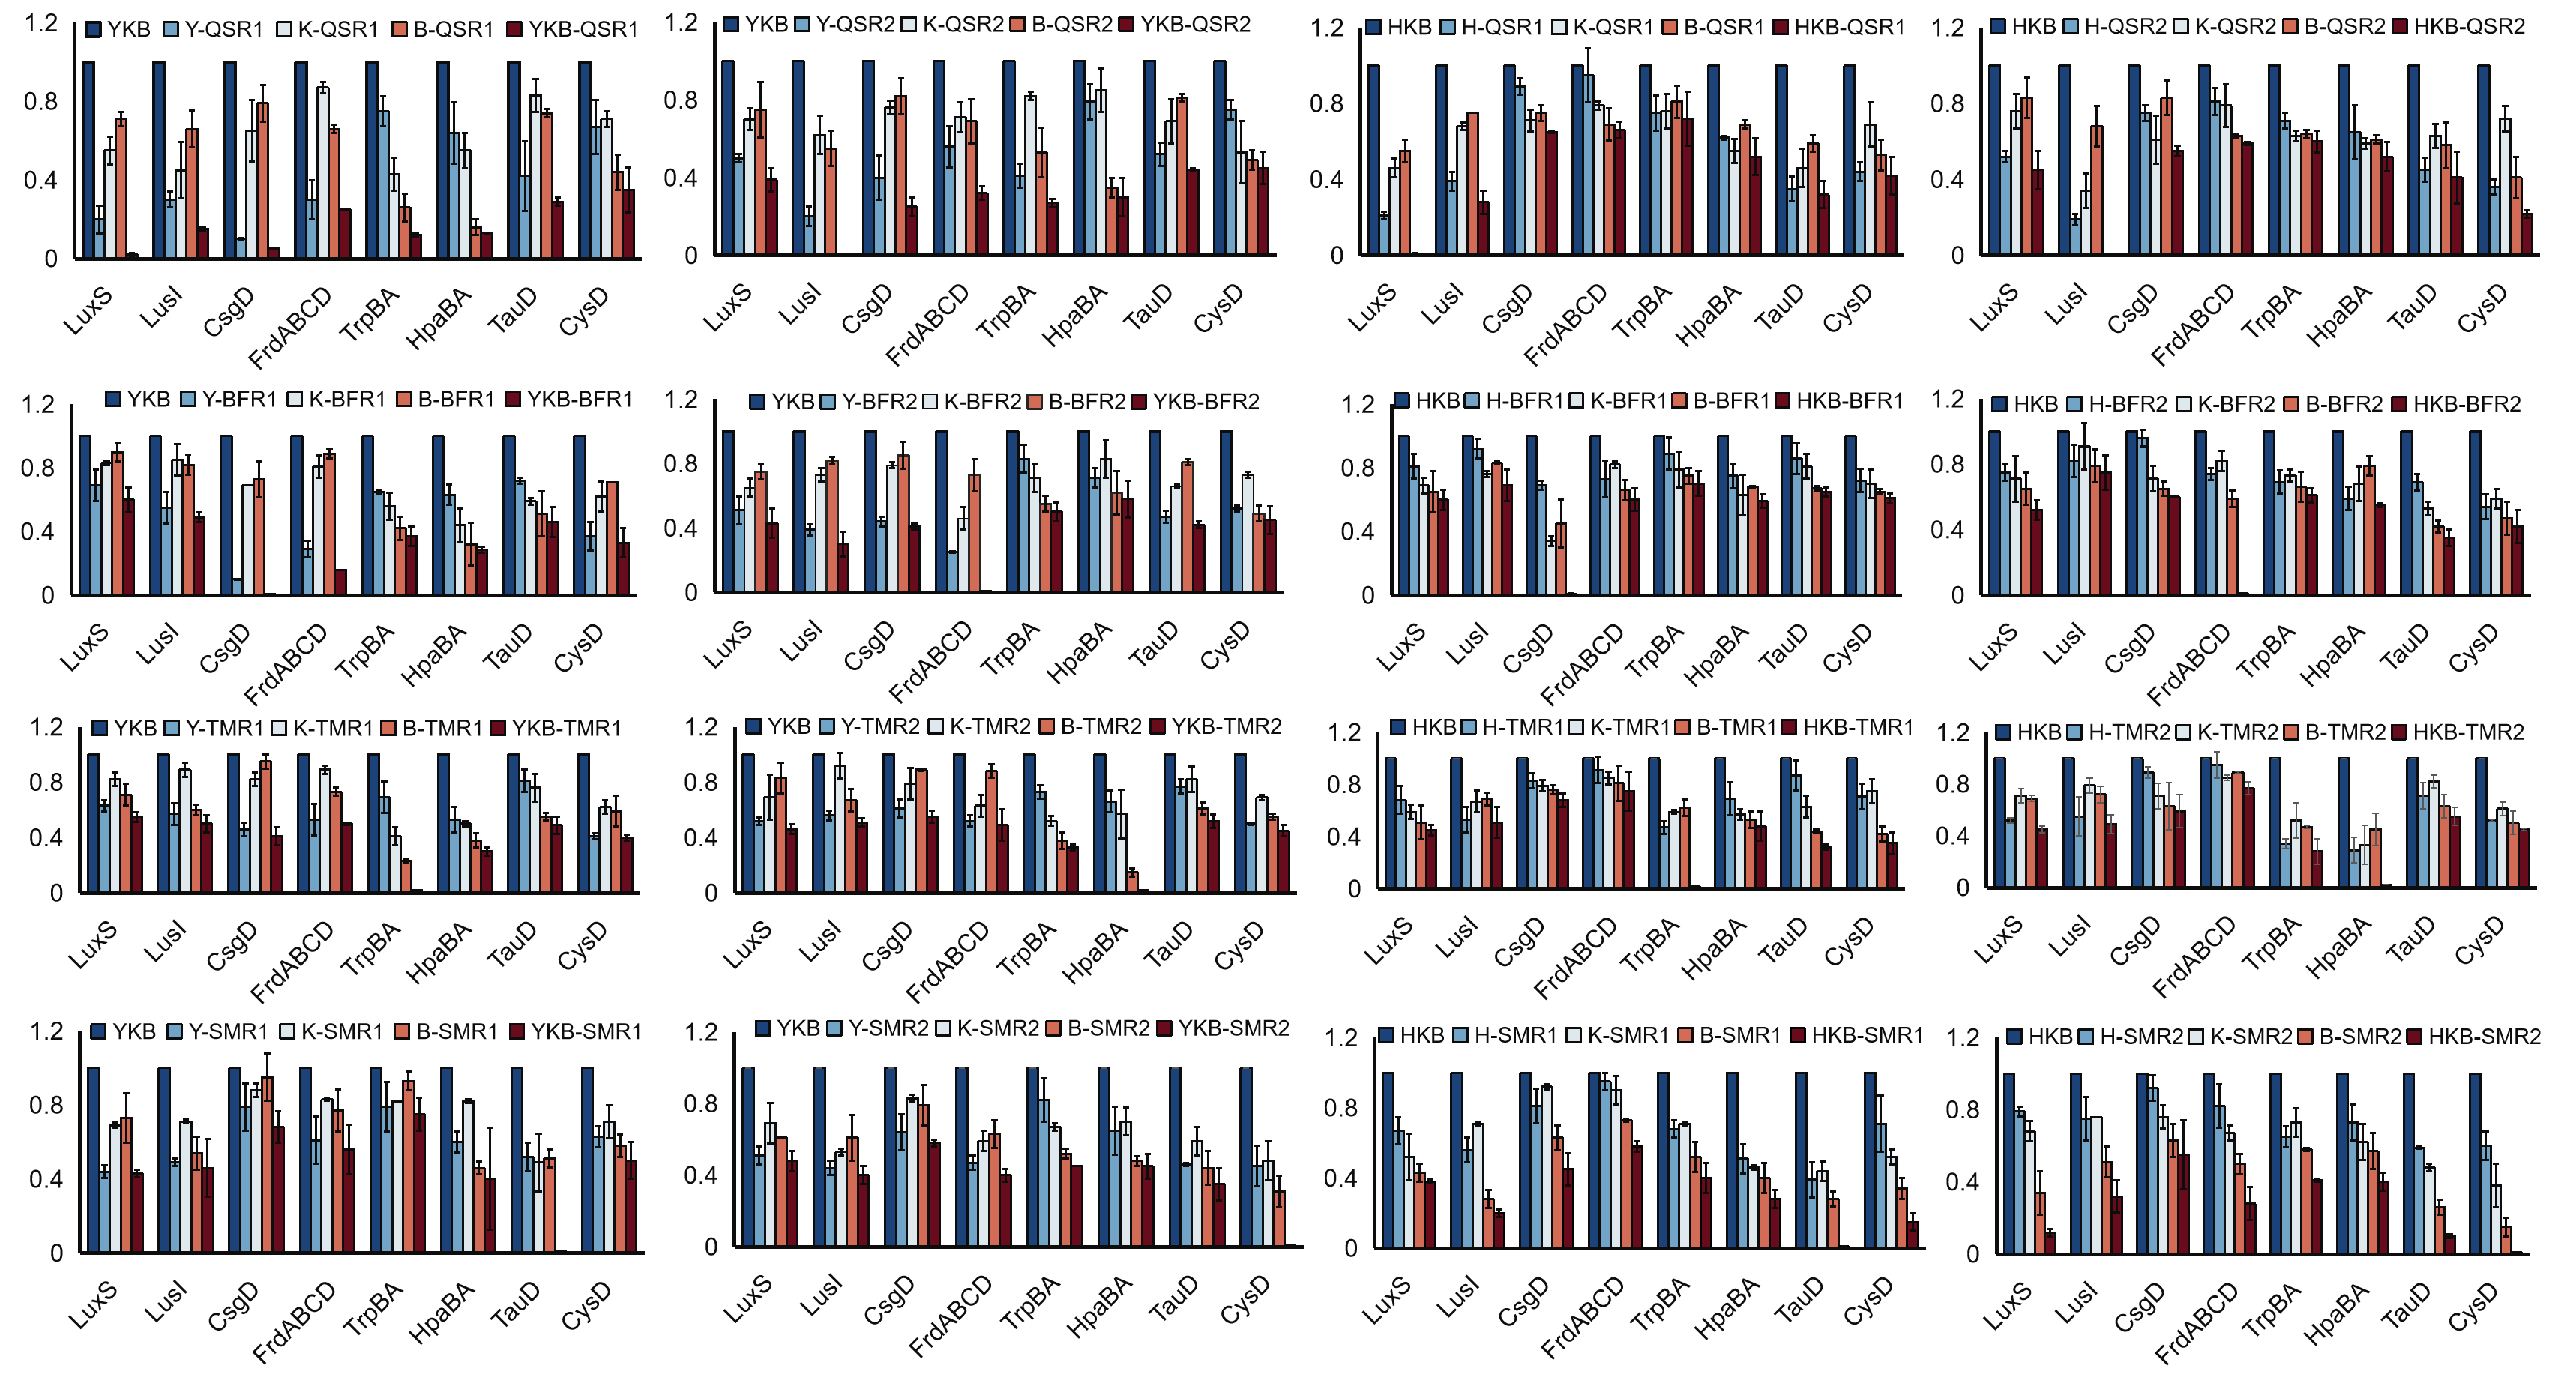


Figure S10 Impact of key metabolic pathways interference on expression levels of key functional genes in SynComs system. YKB and HKB: Control group. Y-R: interference key genes on strain Y1. K-R: interference key genes on strain K1. B-R: interference key genes on strain B1. H-R: interference key genes on strain H1. YKB-R: interference key genes on all members. HKB-R: interference key genes on all members.


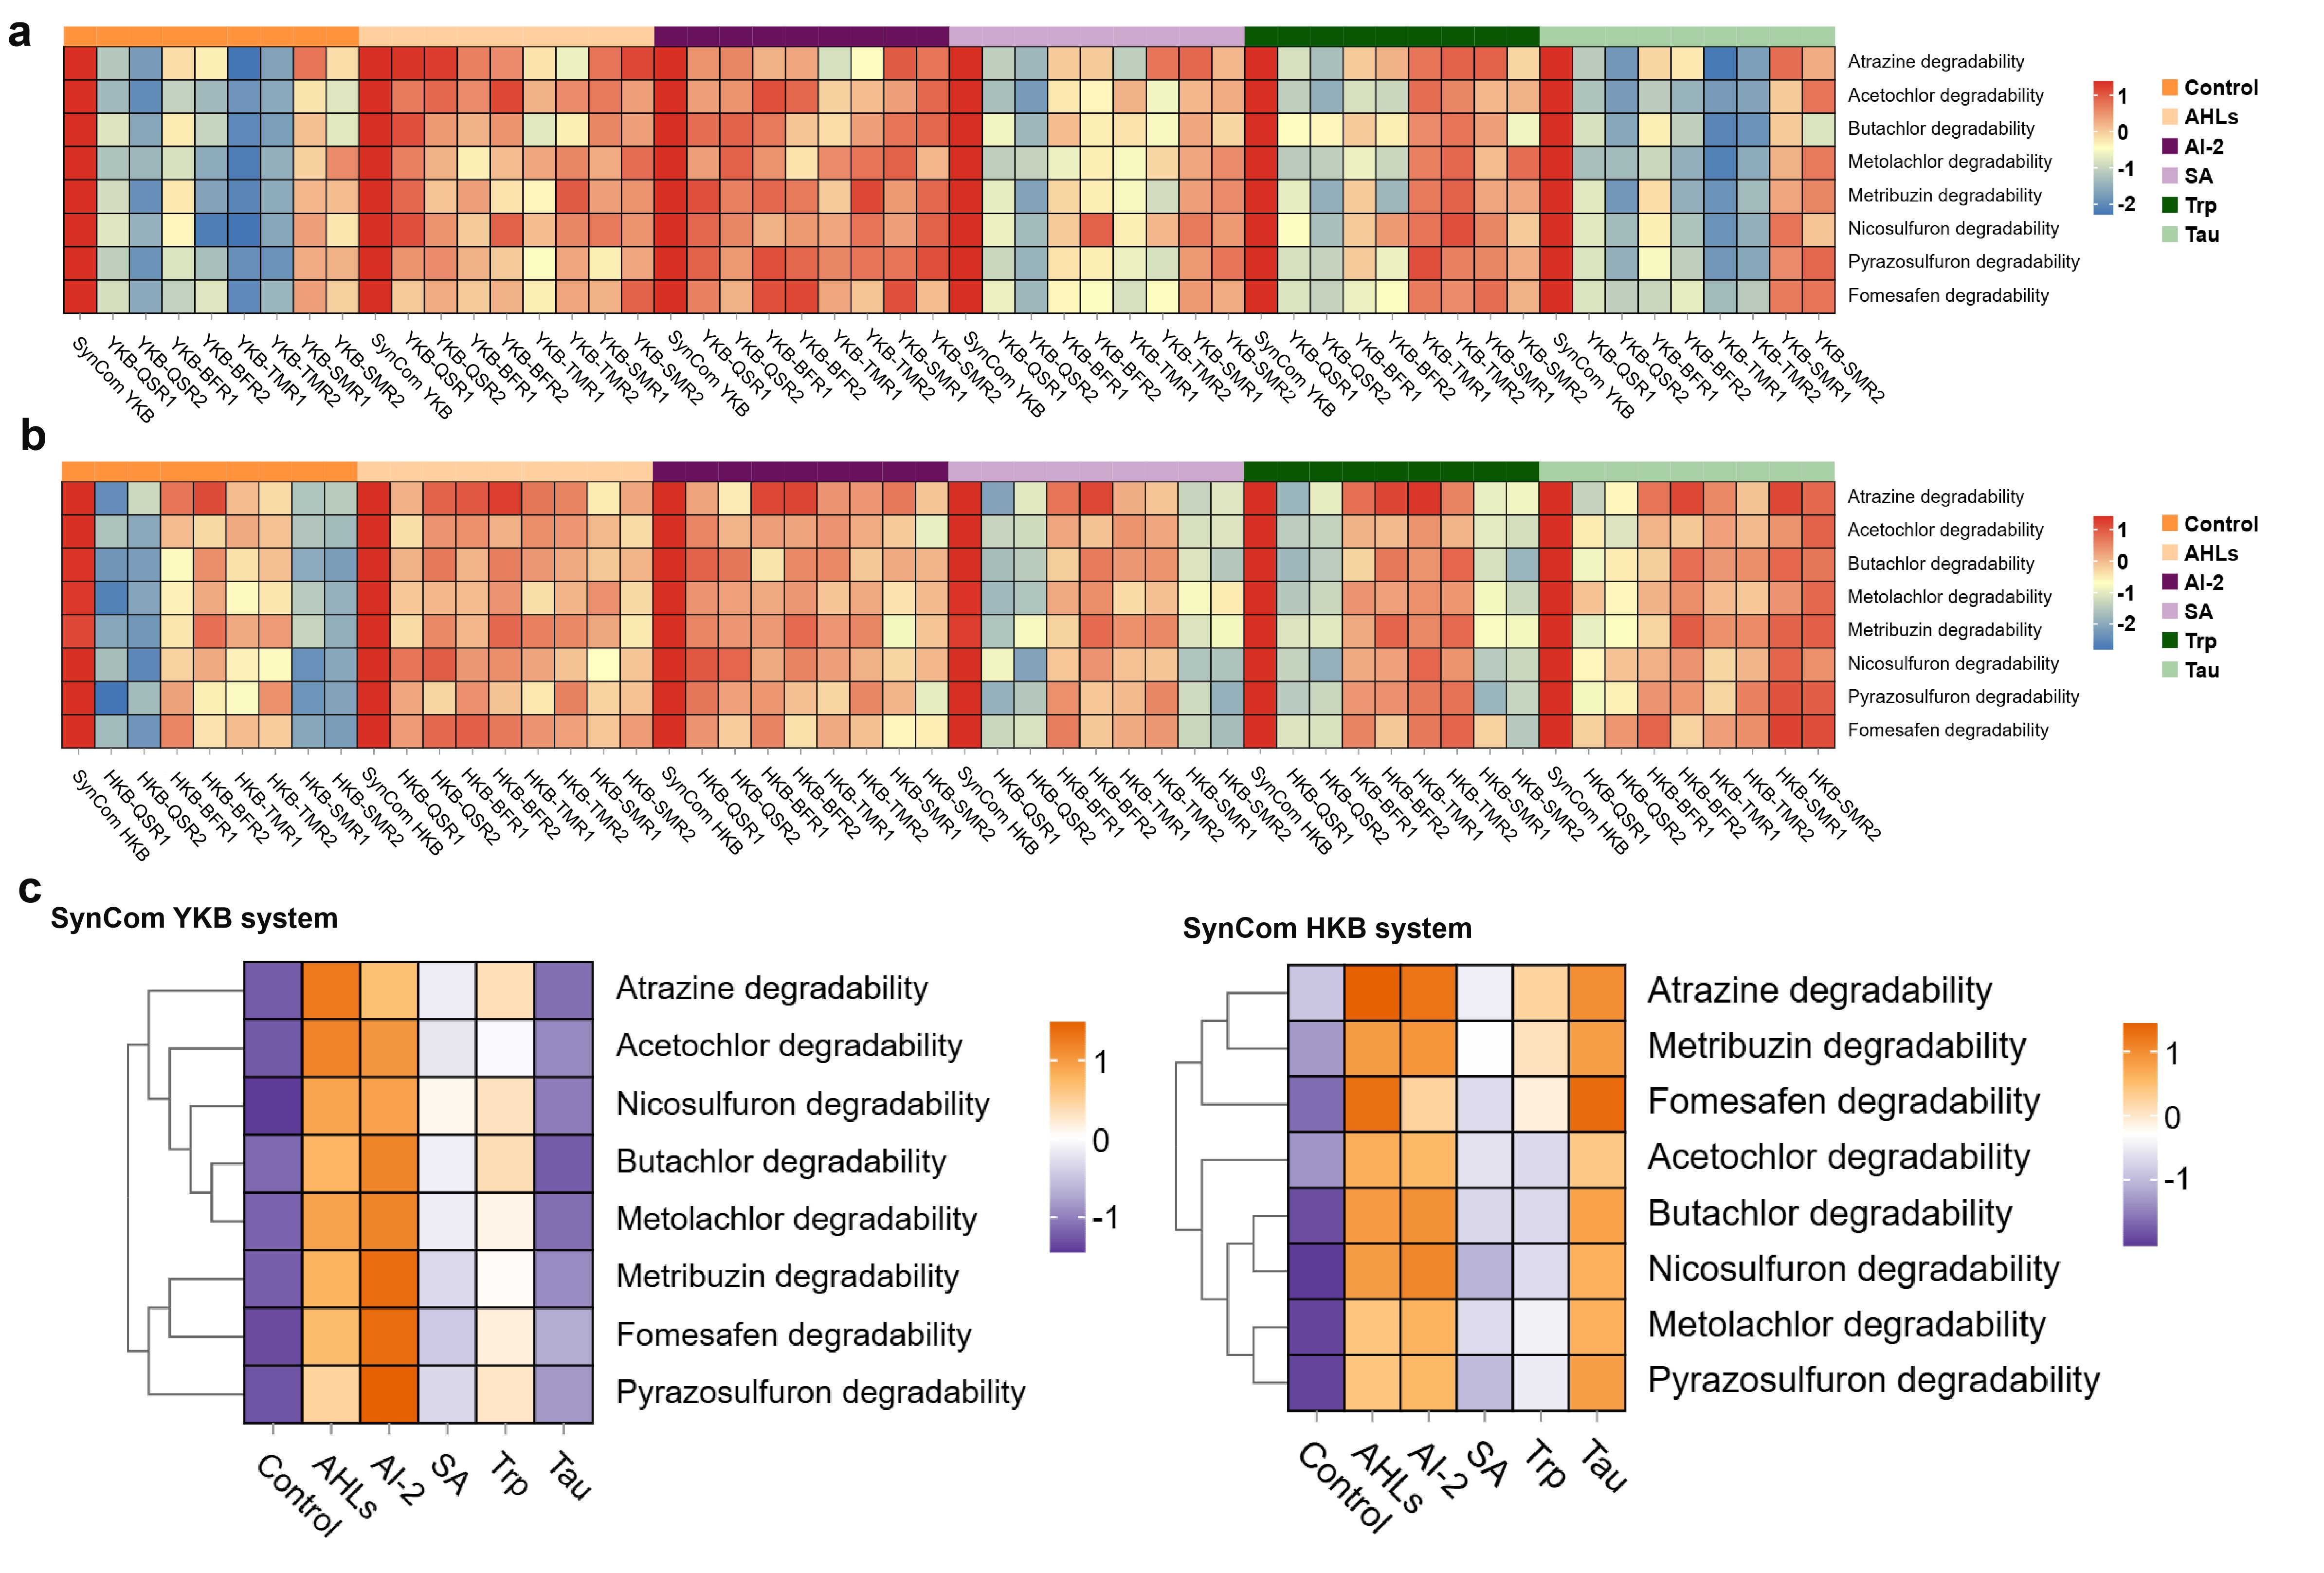


Figure S11 Resilience capacities of exogenous key metabolic on herbicides degradability in SynComs RNAi strains. (a-b) Herbicides degradability resilience in SynCom YKB (a) and HKB (b) systems with the addition of key exogenous metabolites. (c) Meta-analysis of herbicides degradability resilience in SynComs systems with the addition of key exogenous metabolites.


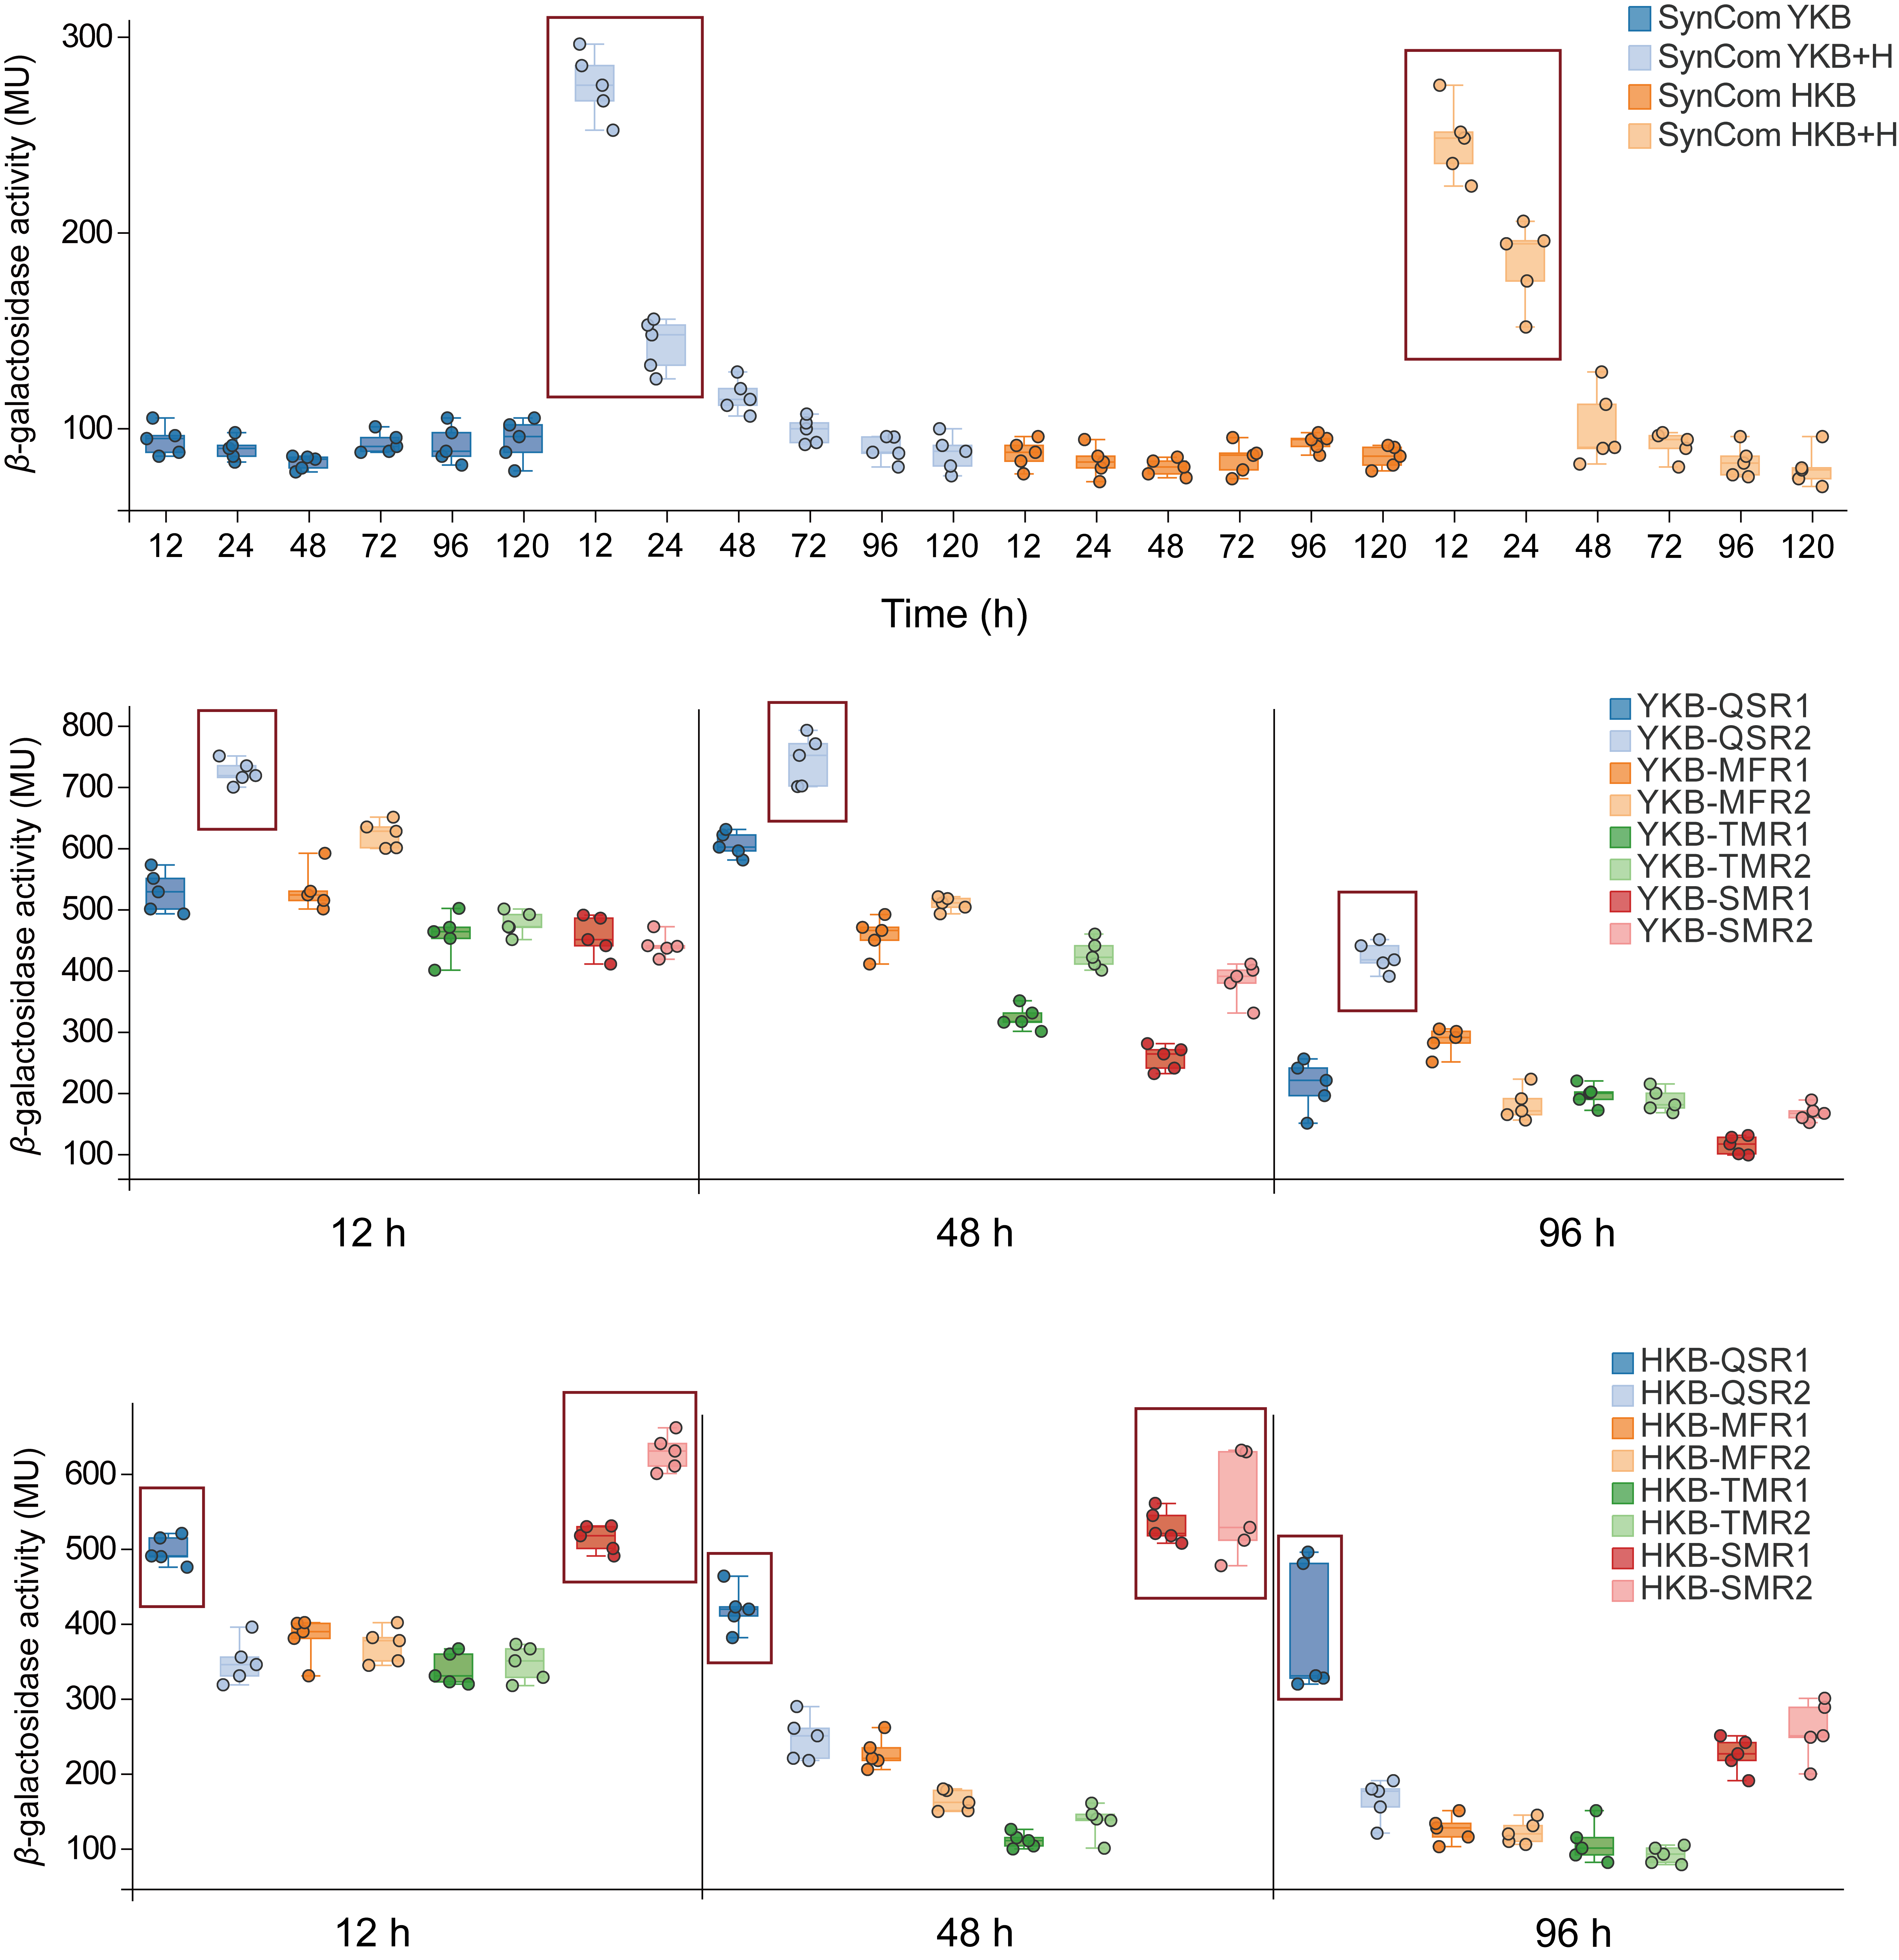


Figure S12 Reporter-based assessment of biotoxicity dynamics. Quantification of residual biotoxicity during herbicides degradation across treatment groups via measurement of *β*-galactosidase activity, and higher activity indicates elevated intracellular biotoxicity.


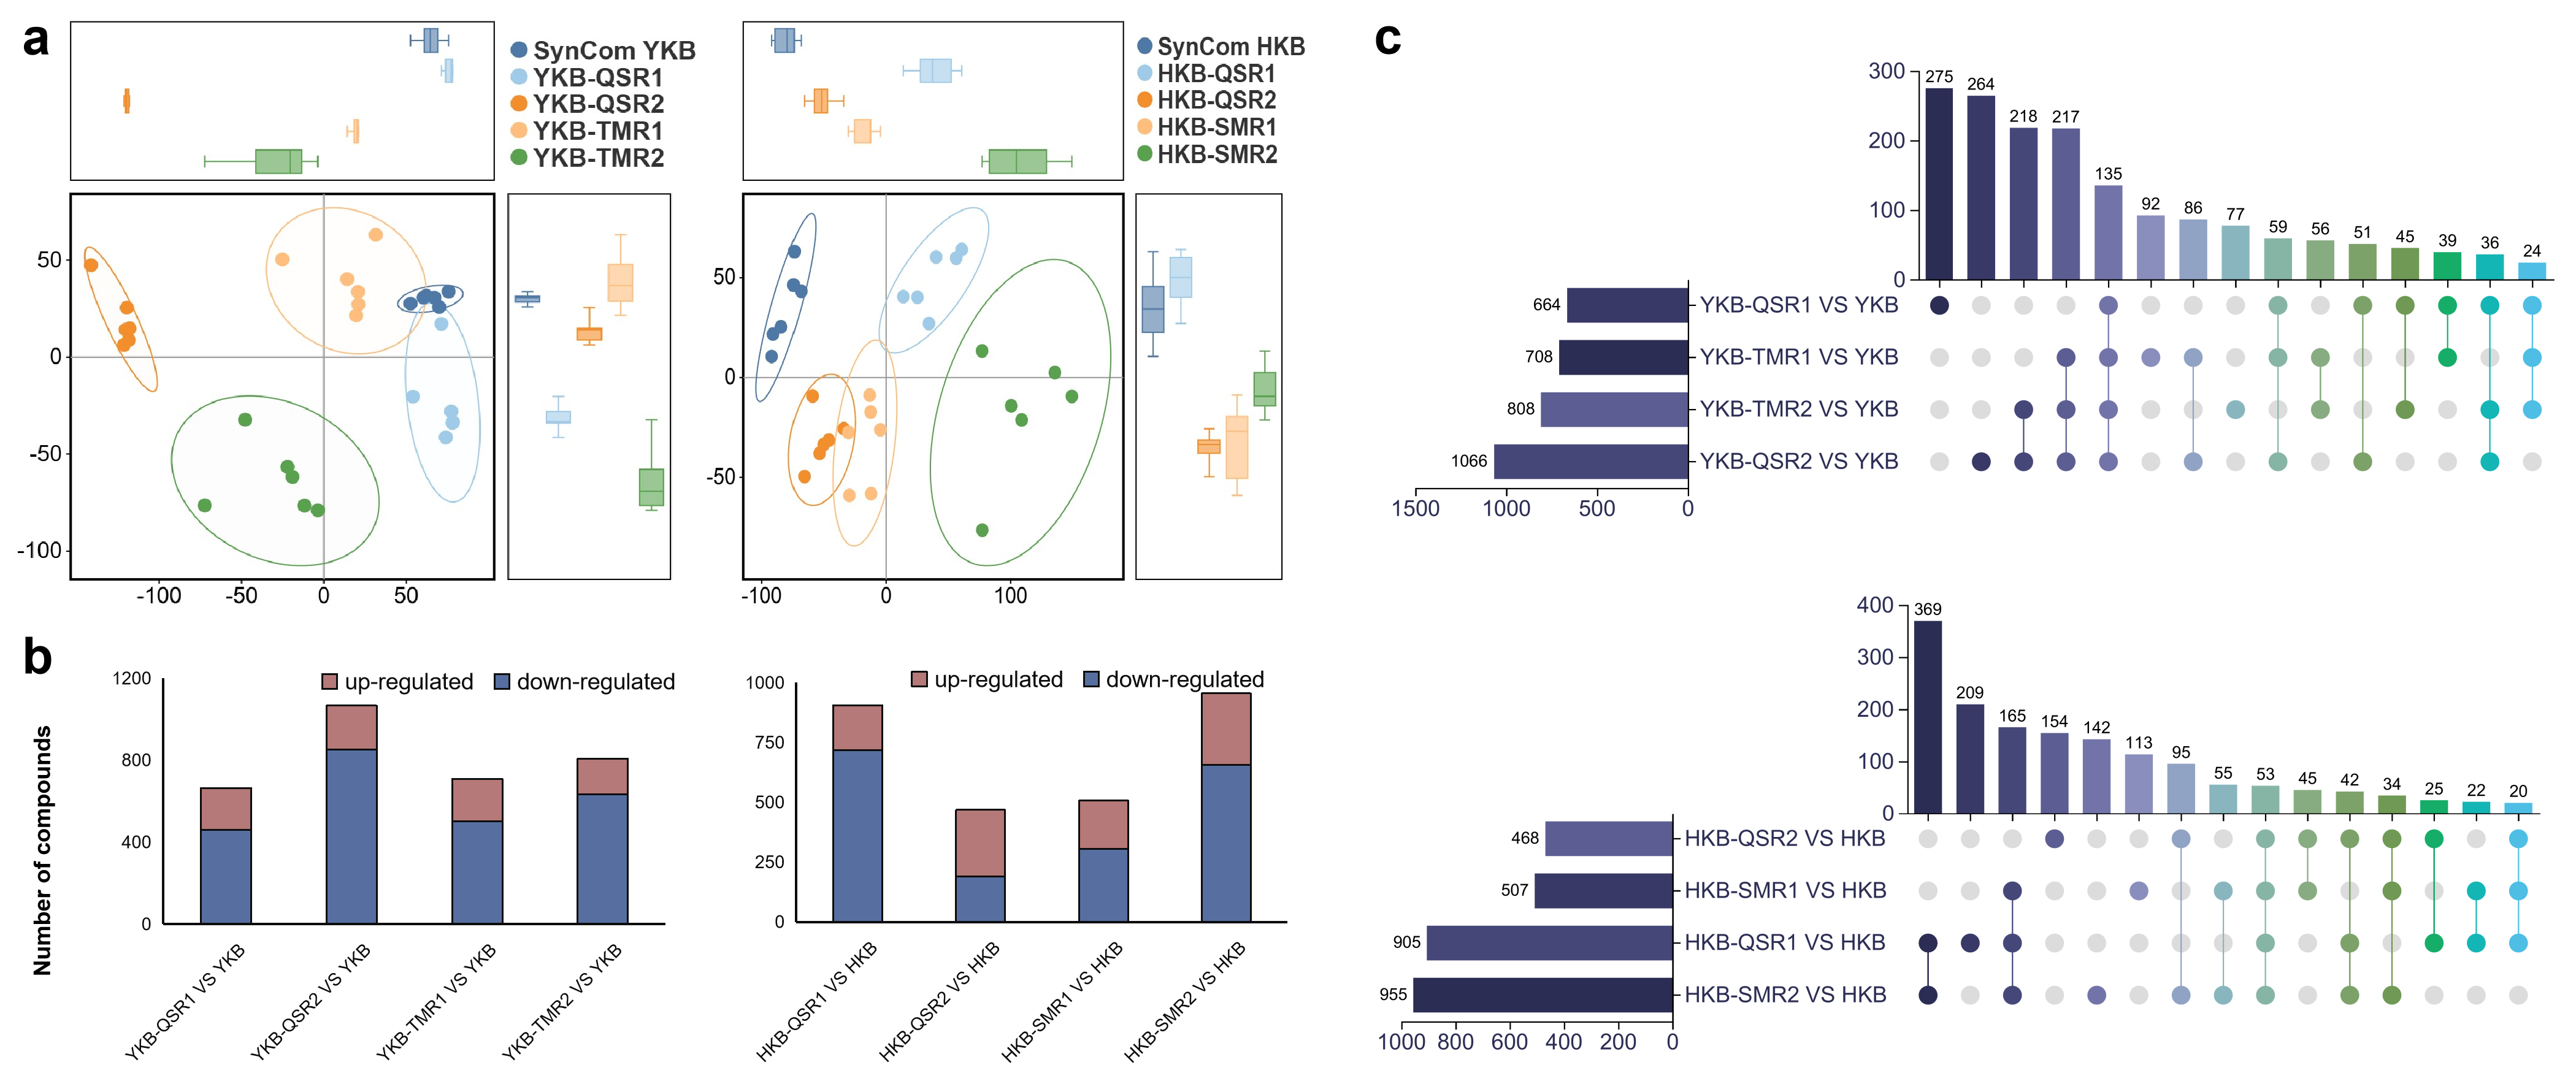


Figure S13 Metabolomics analysis of key interference systems in SynComs. (a) PCA analysis of wild and interference systems. (b) Significantly different metabolites between interference systems and wild-type systems. Red indicates up-regulated metabolites, and blue indicates down-regulated metabolites. (c) Upset plot showing shared and unique metabolites between different interference systems and wild-type systems.


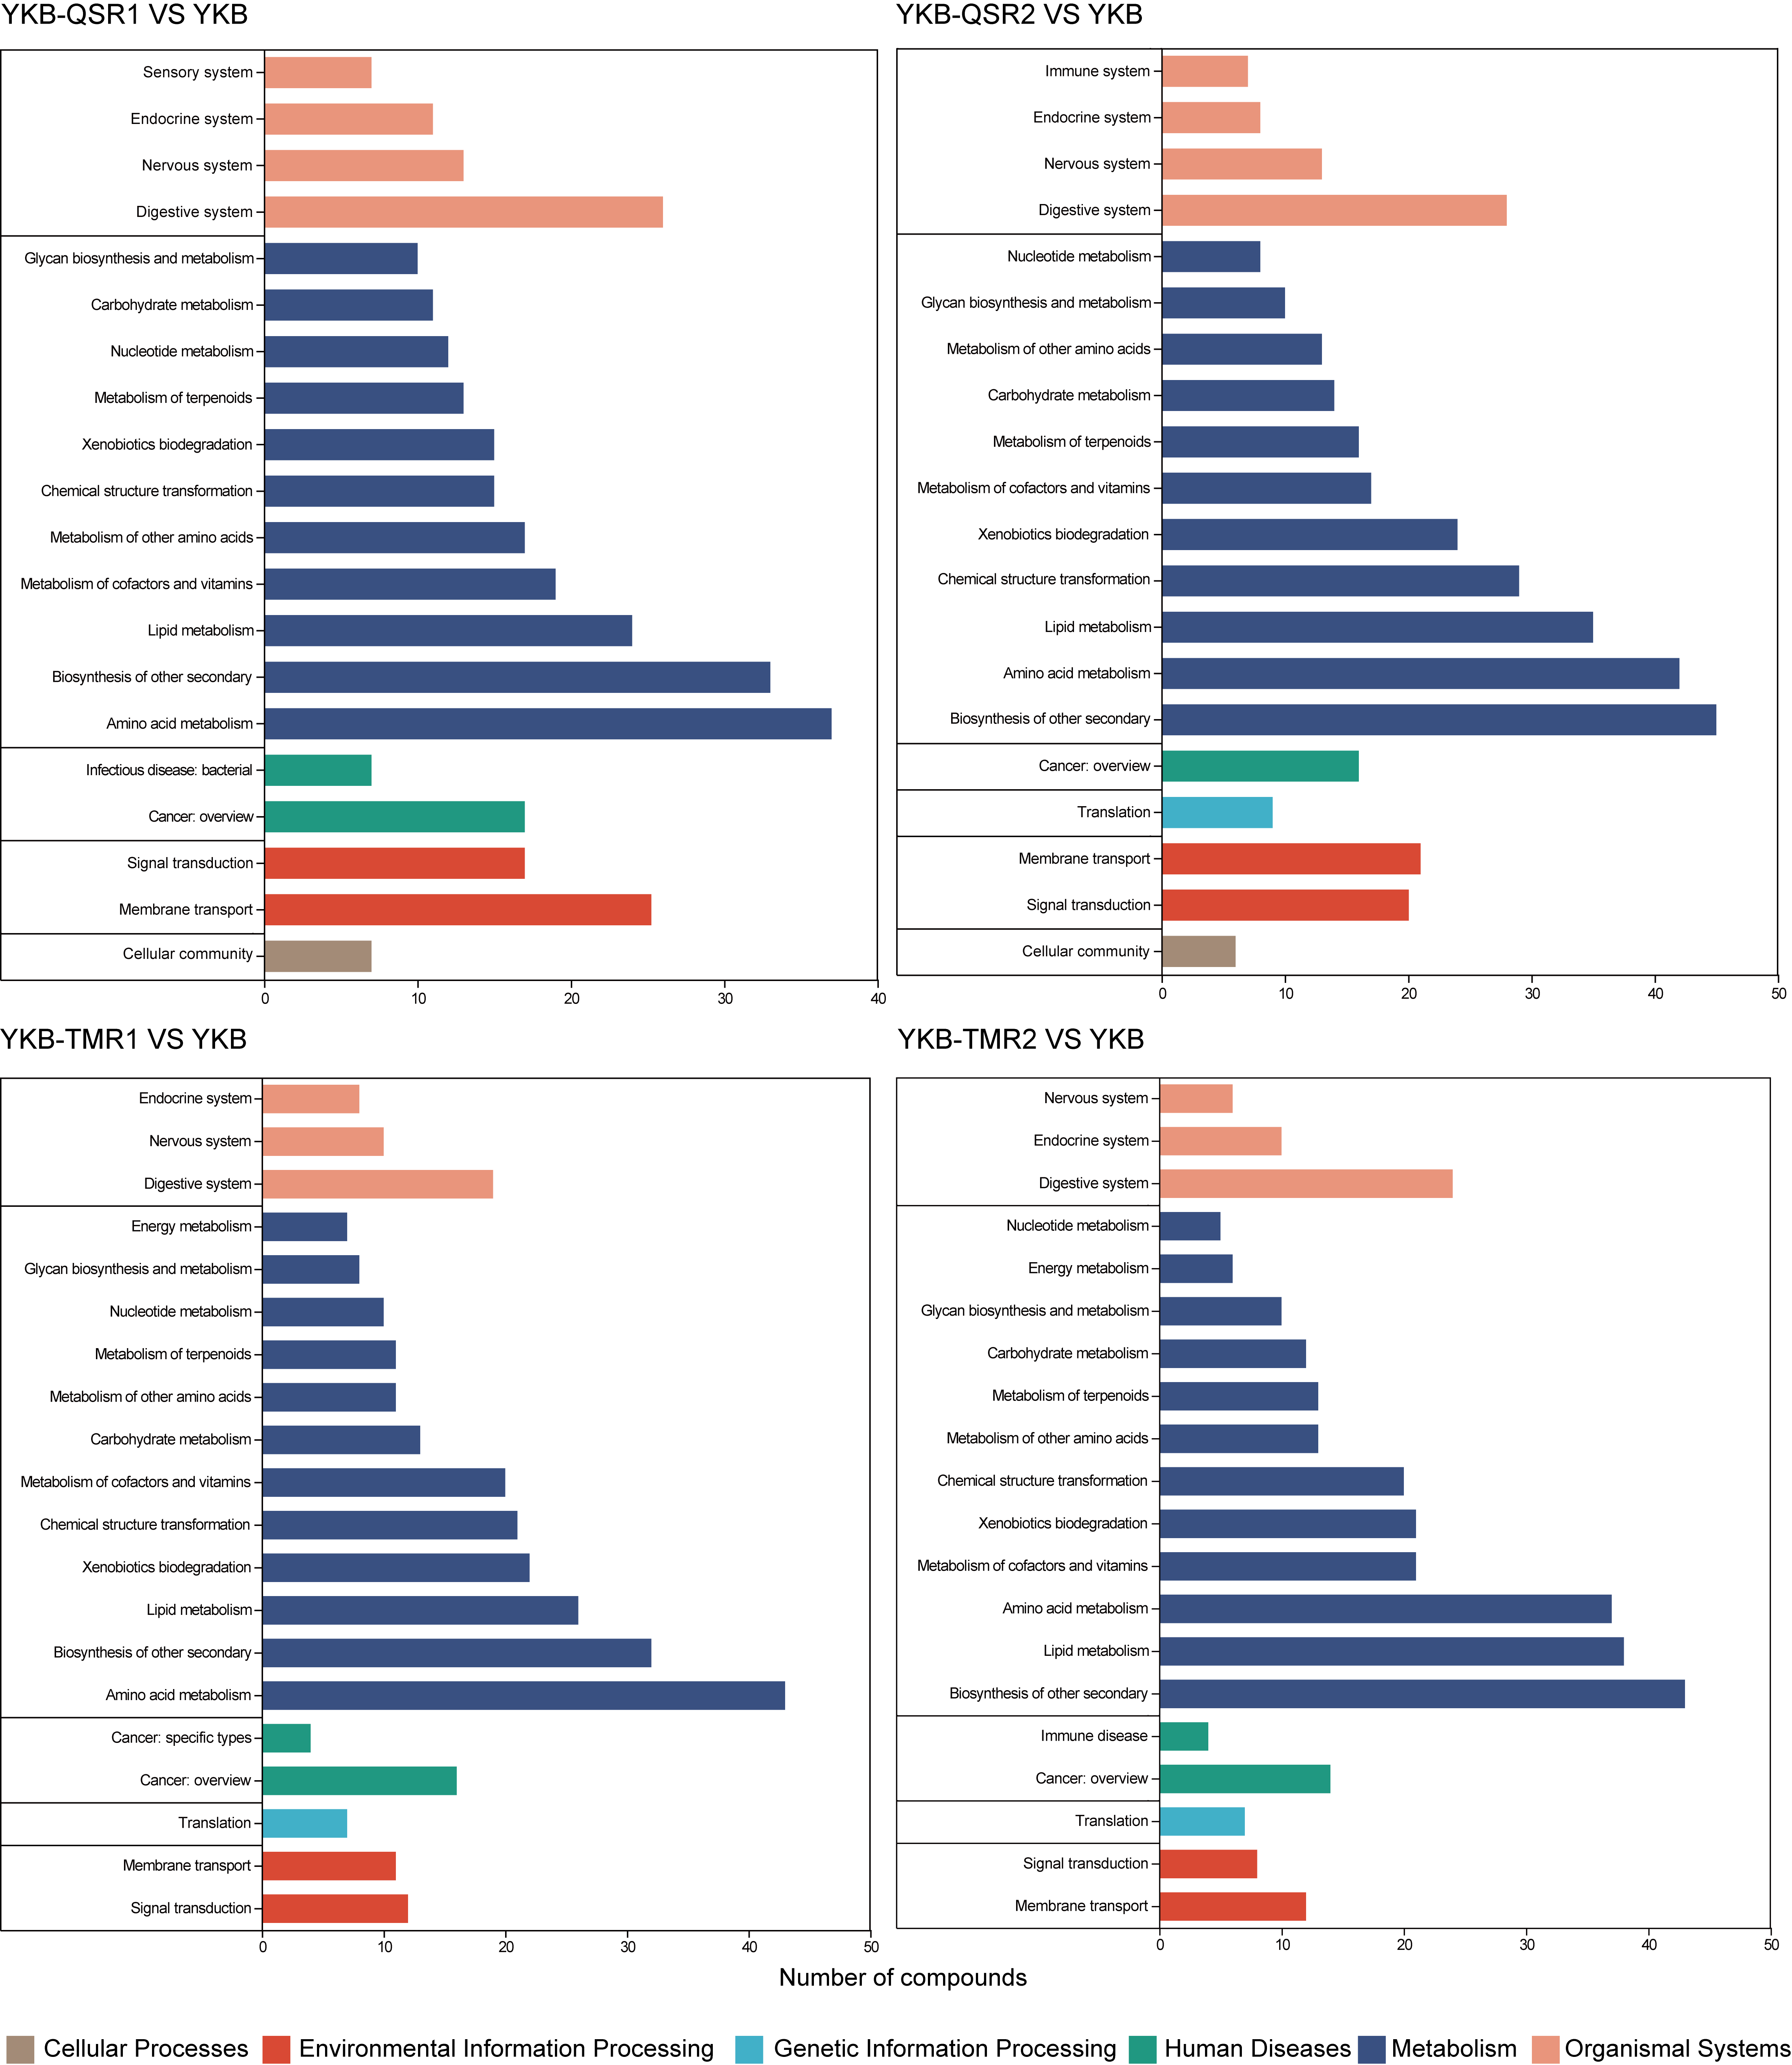


Figure S14 KEGG classification and number of differentially metabolites compared with SynCom YKB in different interference systems.


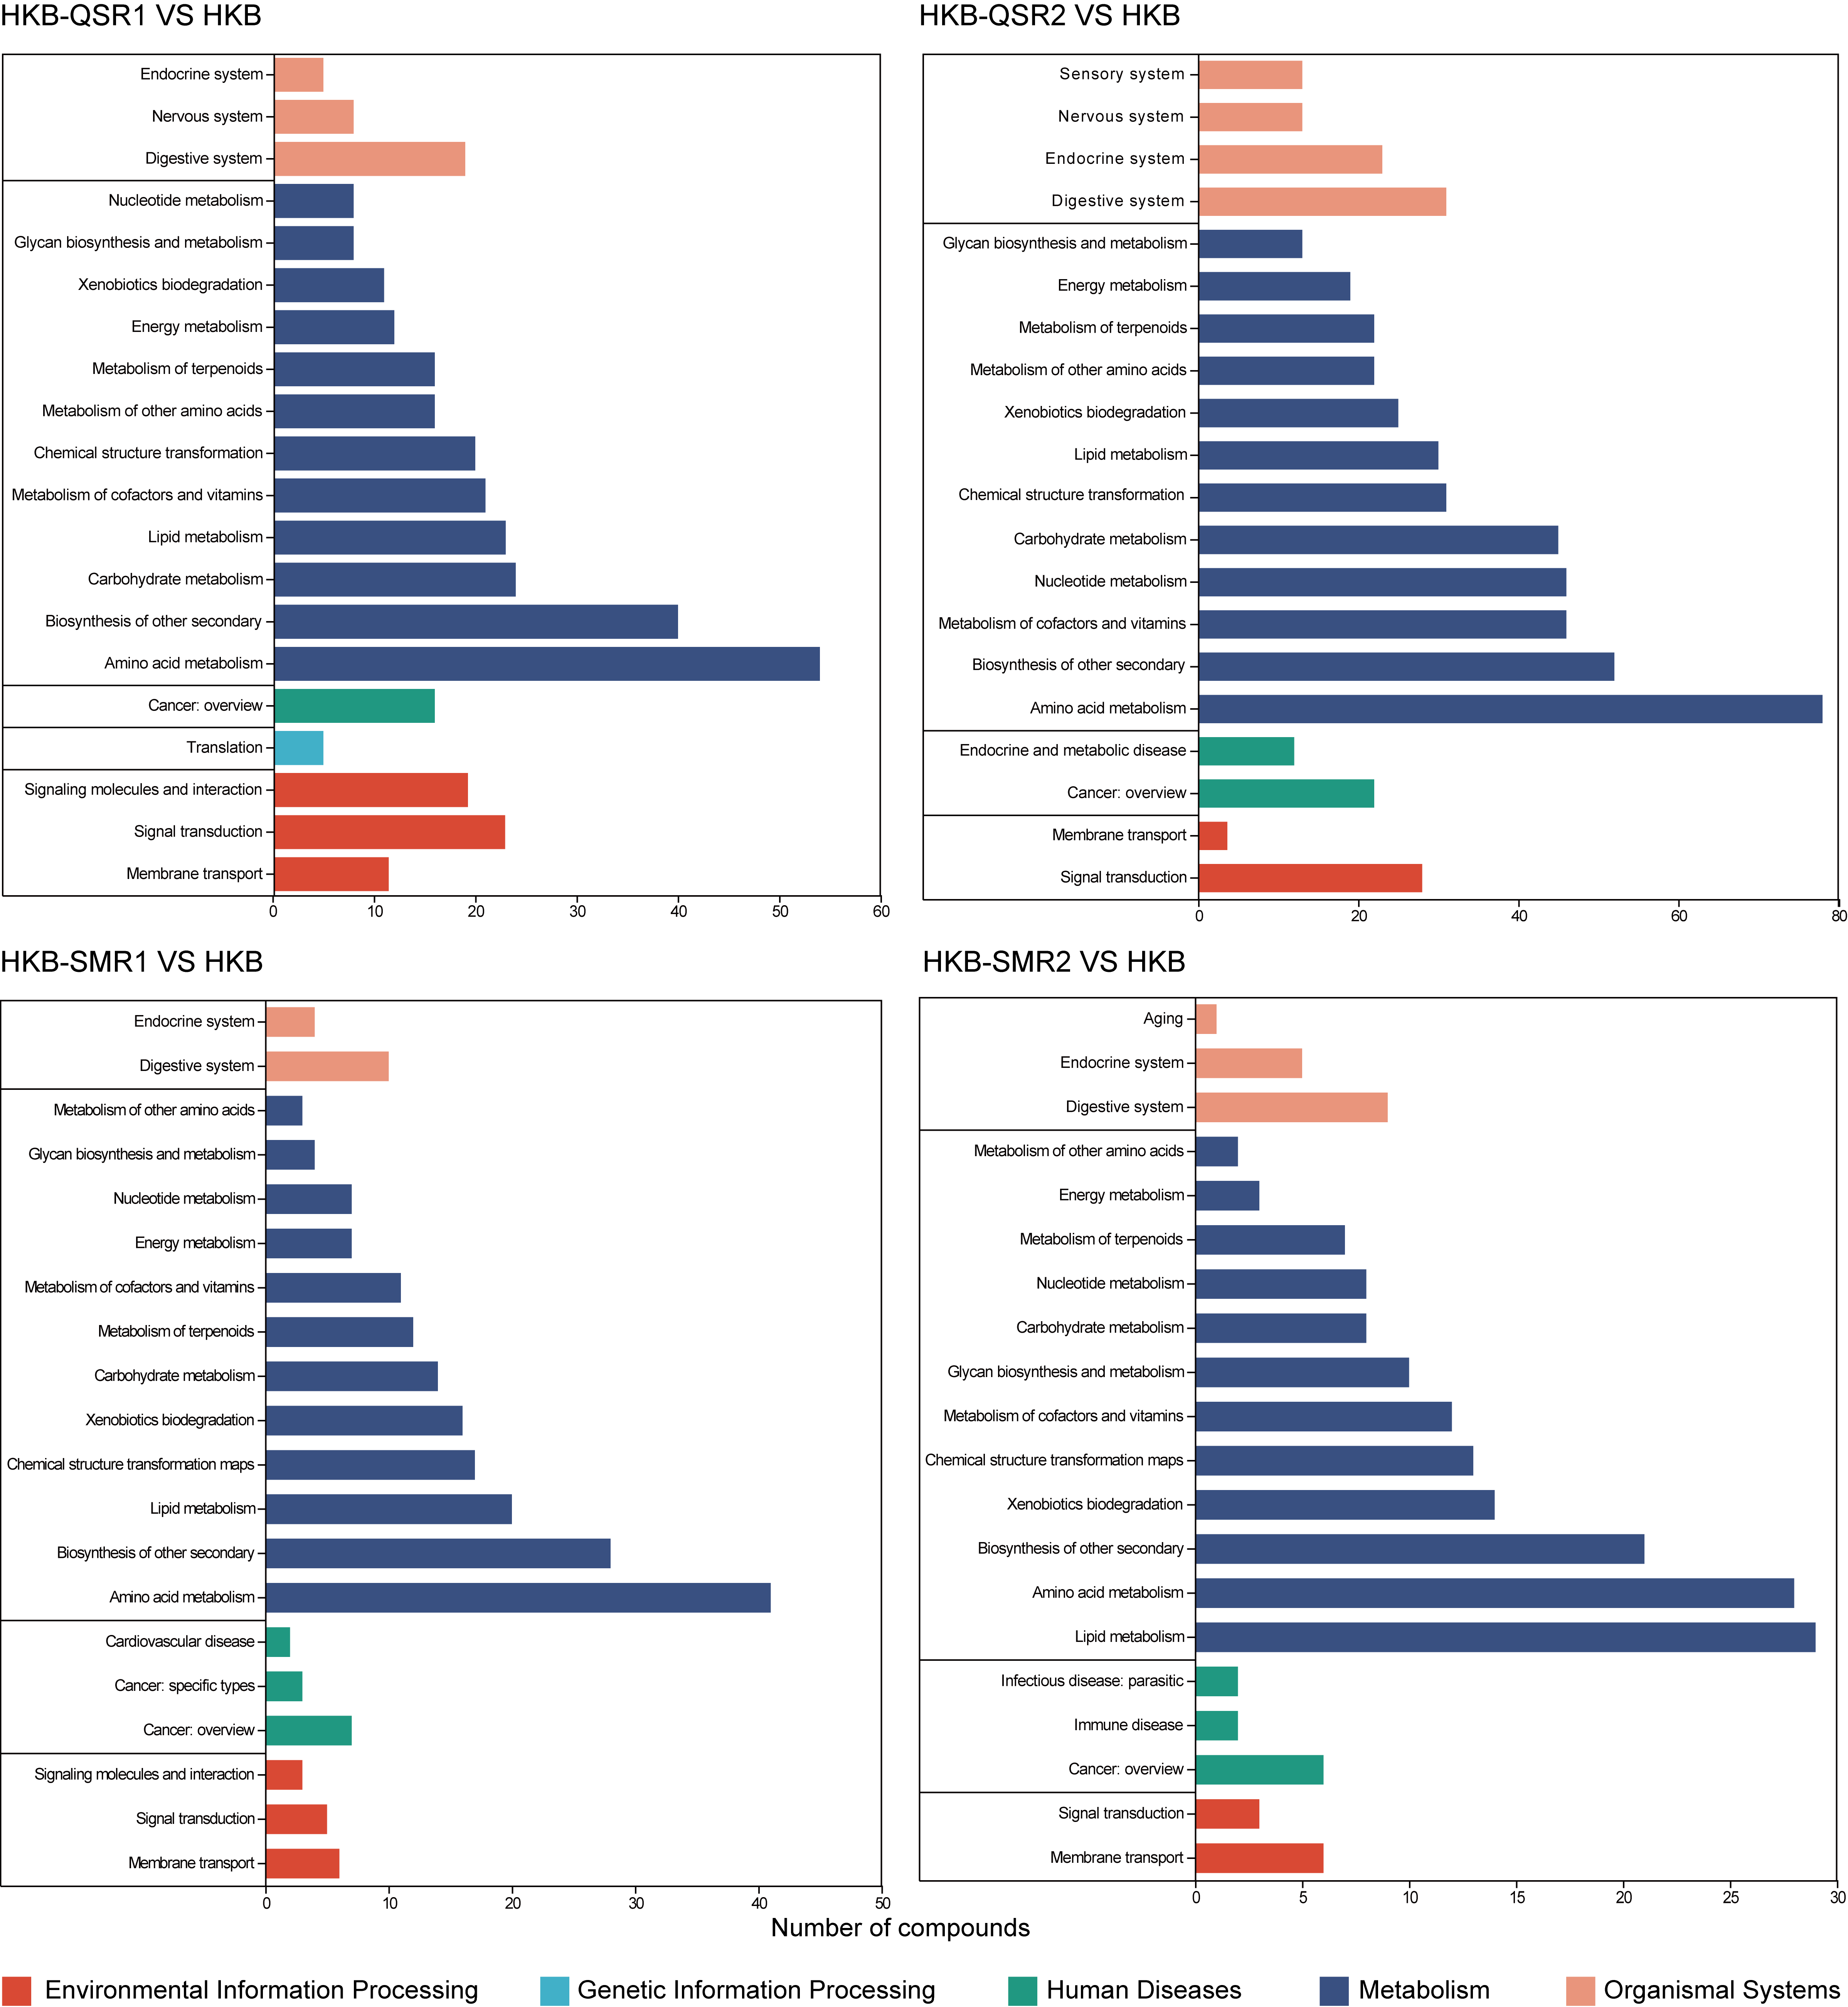


Figure S15 KEGG classification and number of differentially metabolites compared with SynCom HKB in different interference systems.


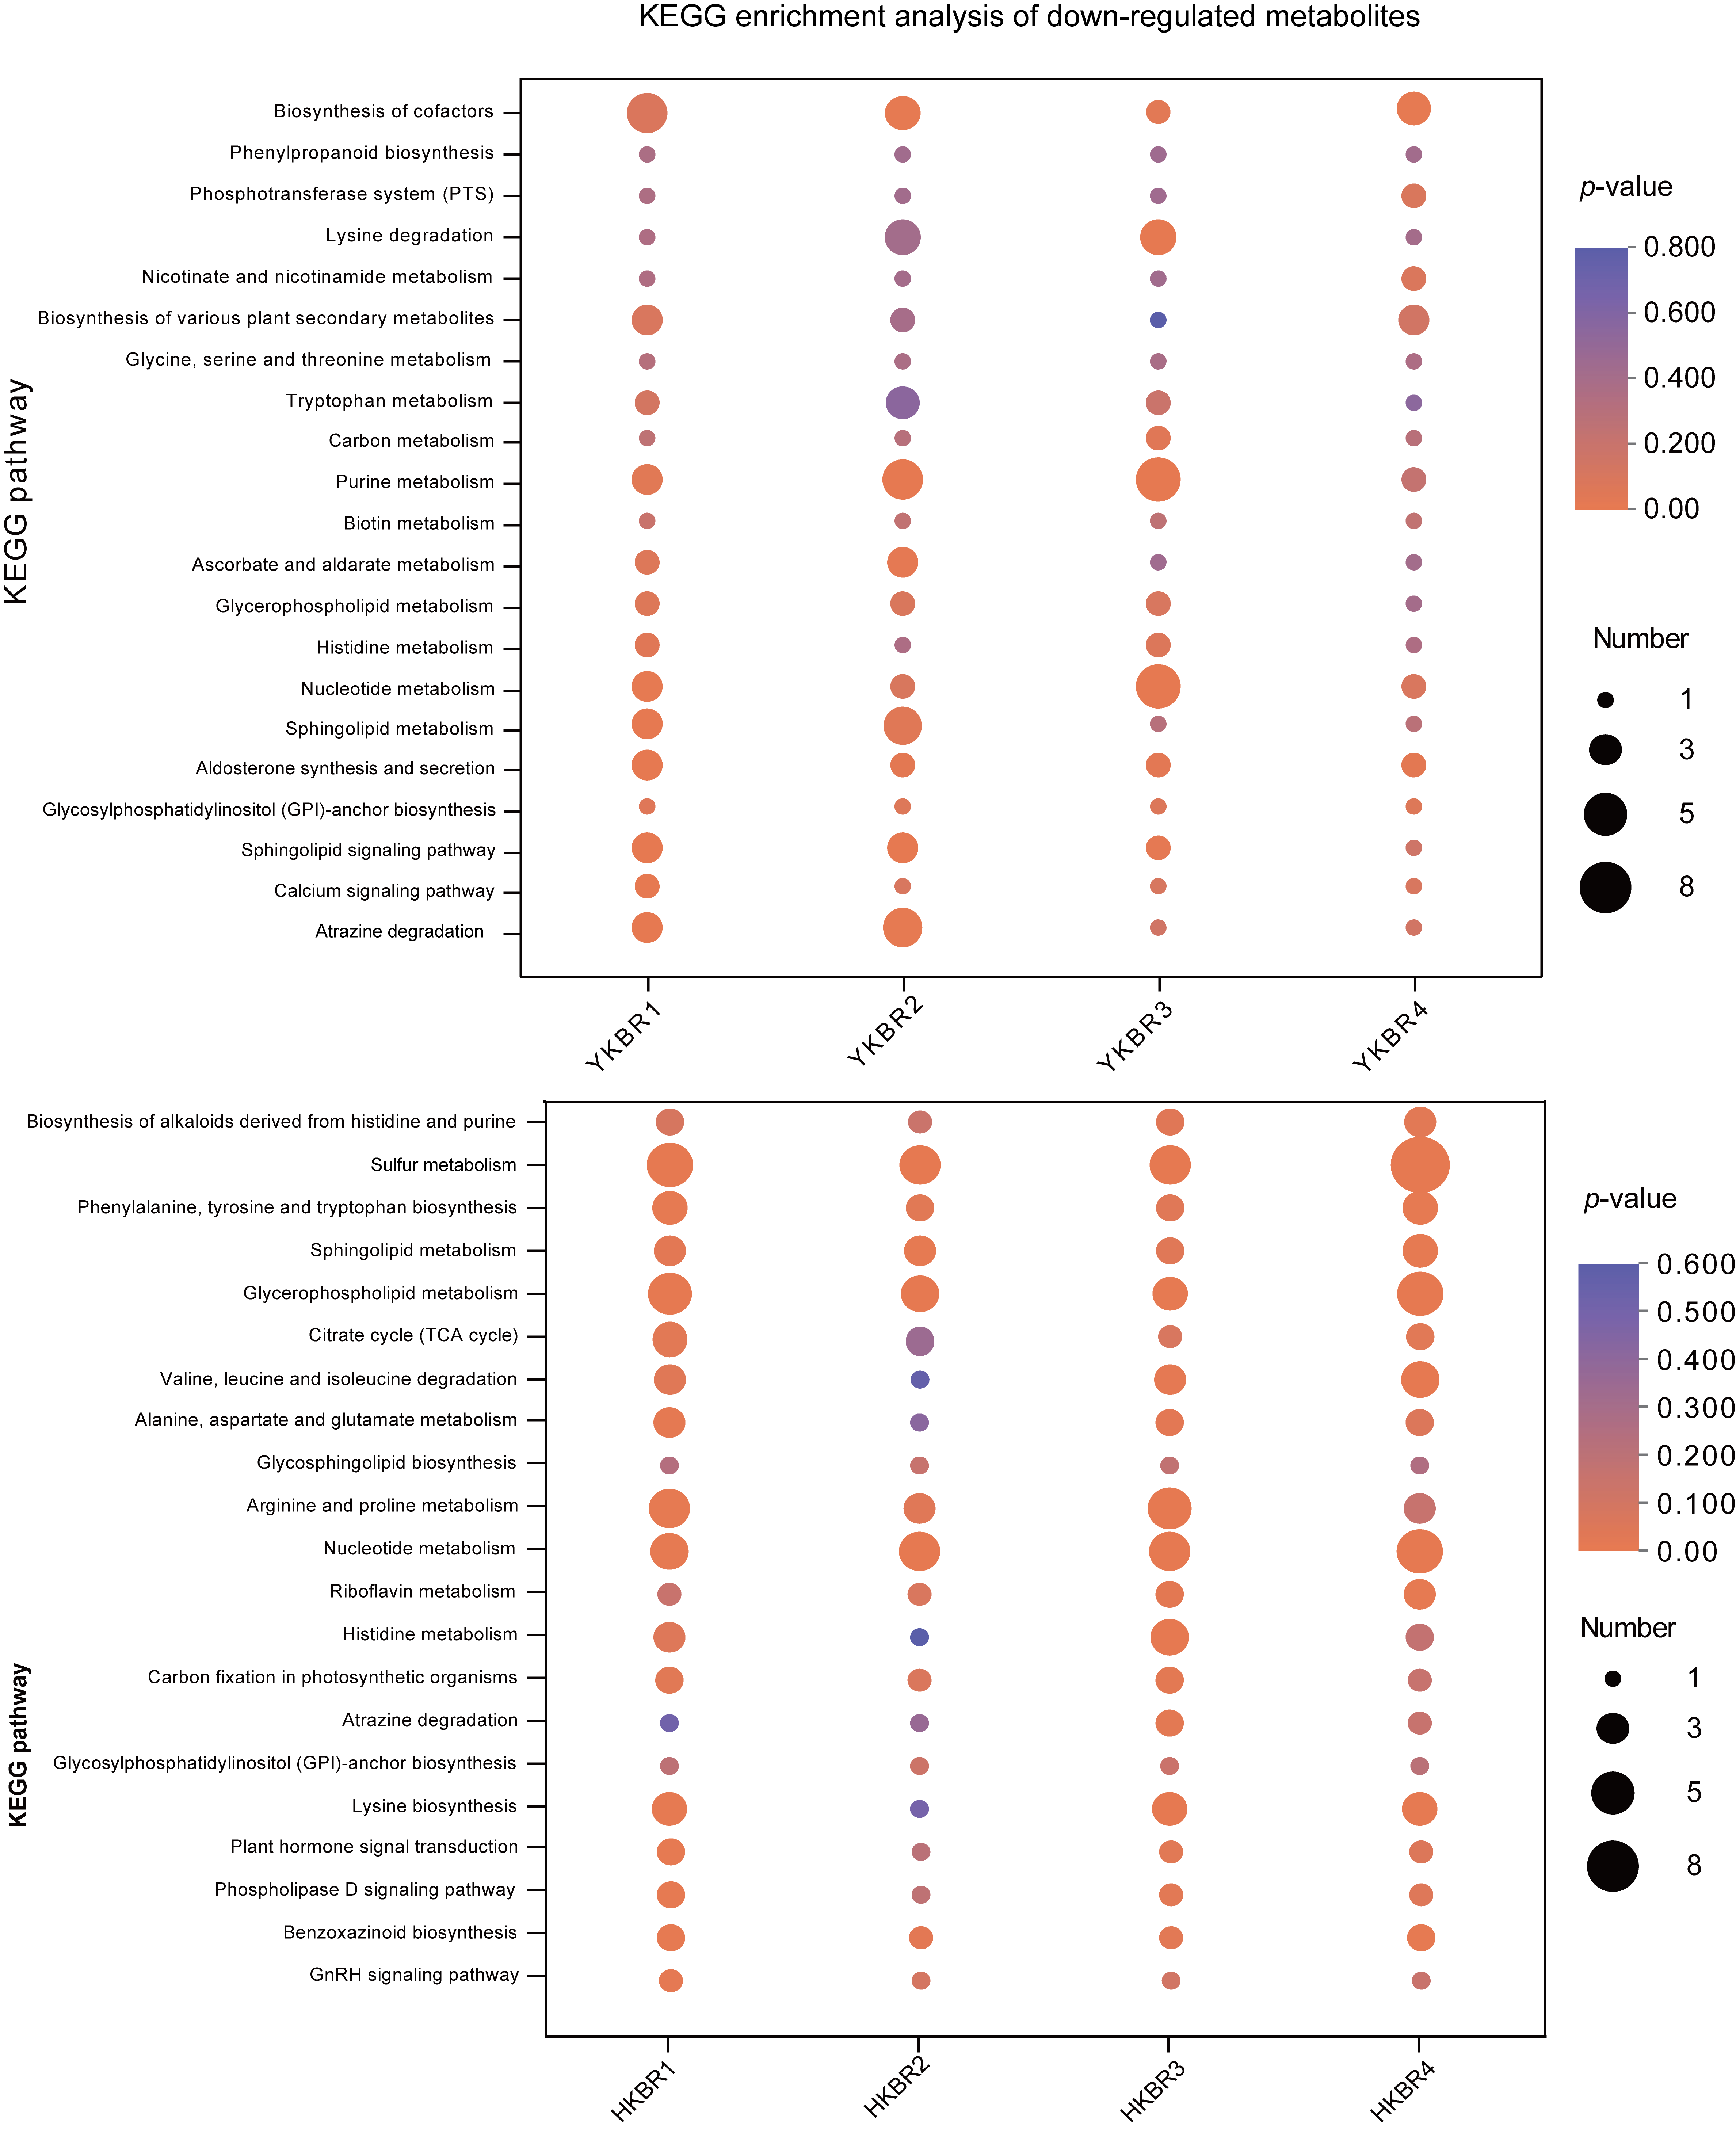


Figure S16 Comparison of KEGG enrichment of down-regulated differentially expressed metabolic pathways in interference systems.


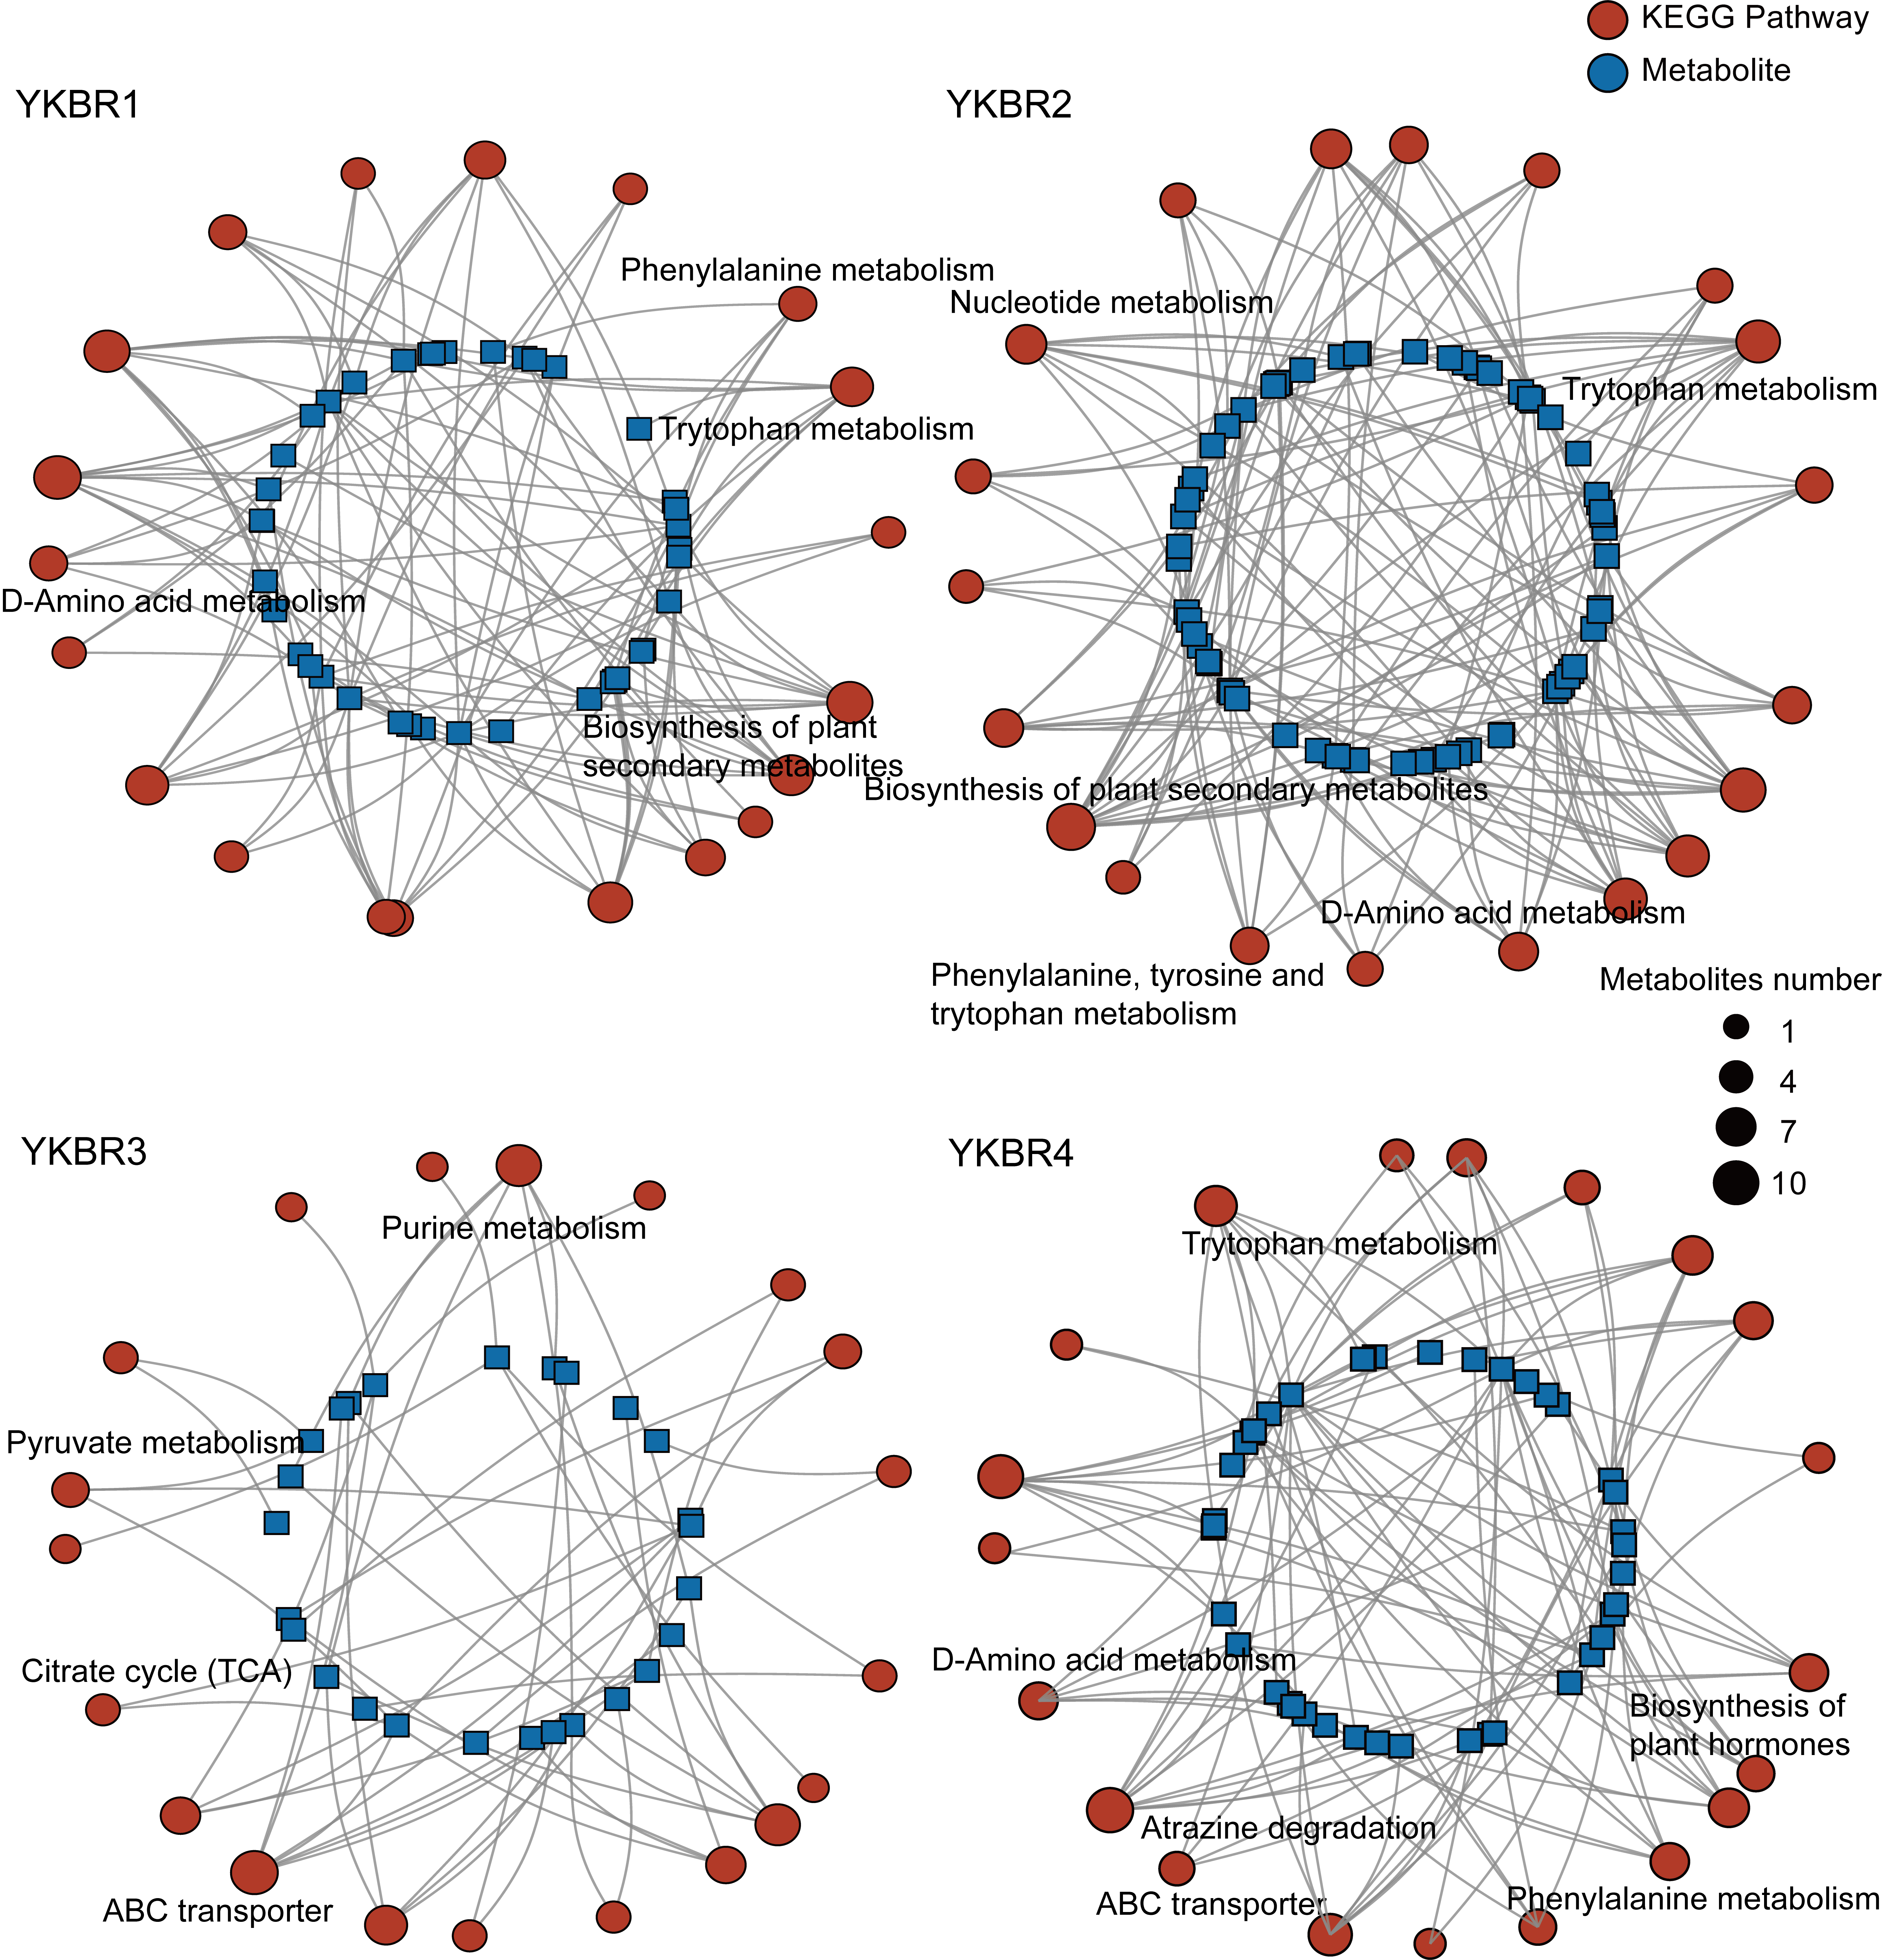


Figure S17 KEGG enrichment analysis network diagrams in SynCom YKB interference systems. Red represents KEGG pathways, and blue represents metabolites. The size represents the number of metabolites in the pathway.


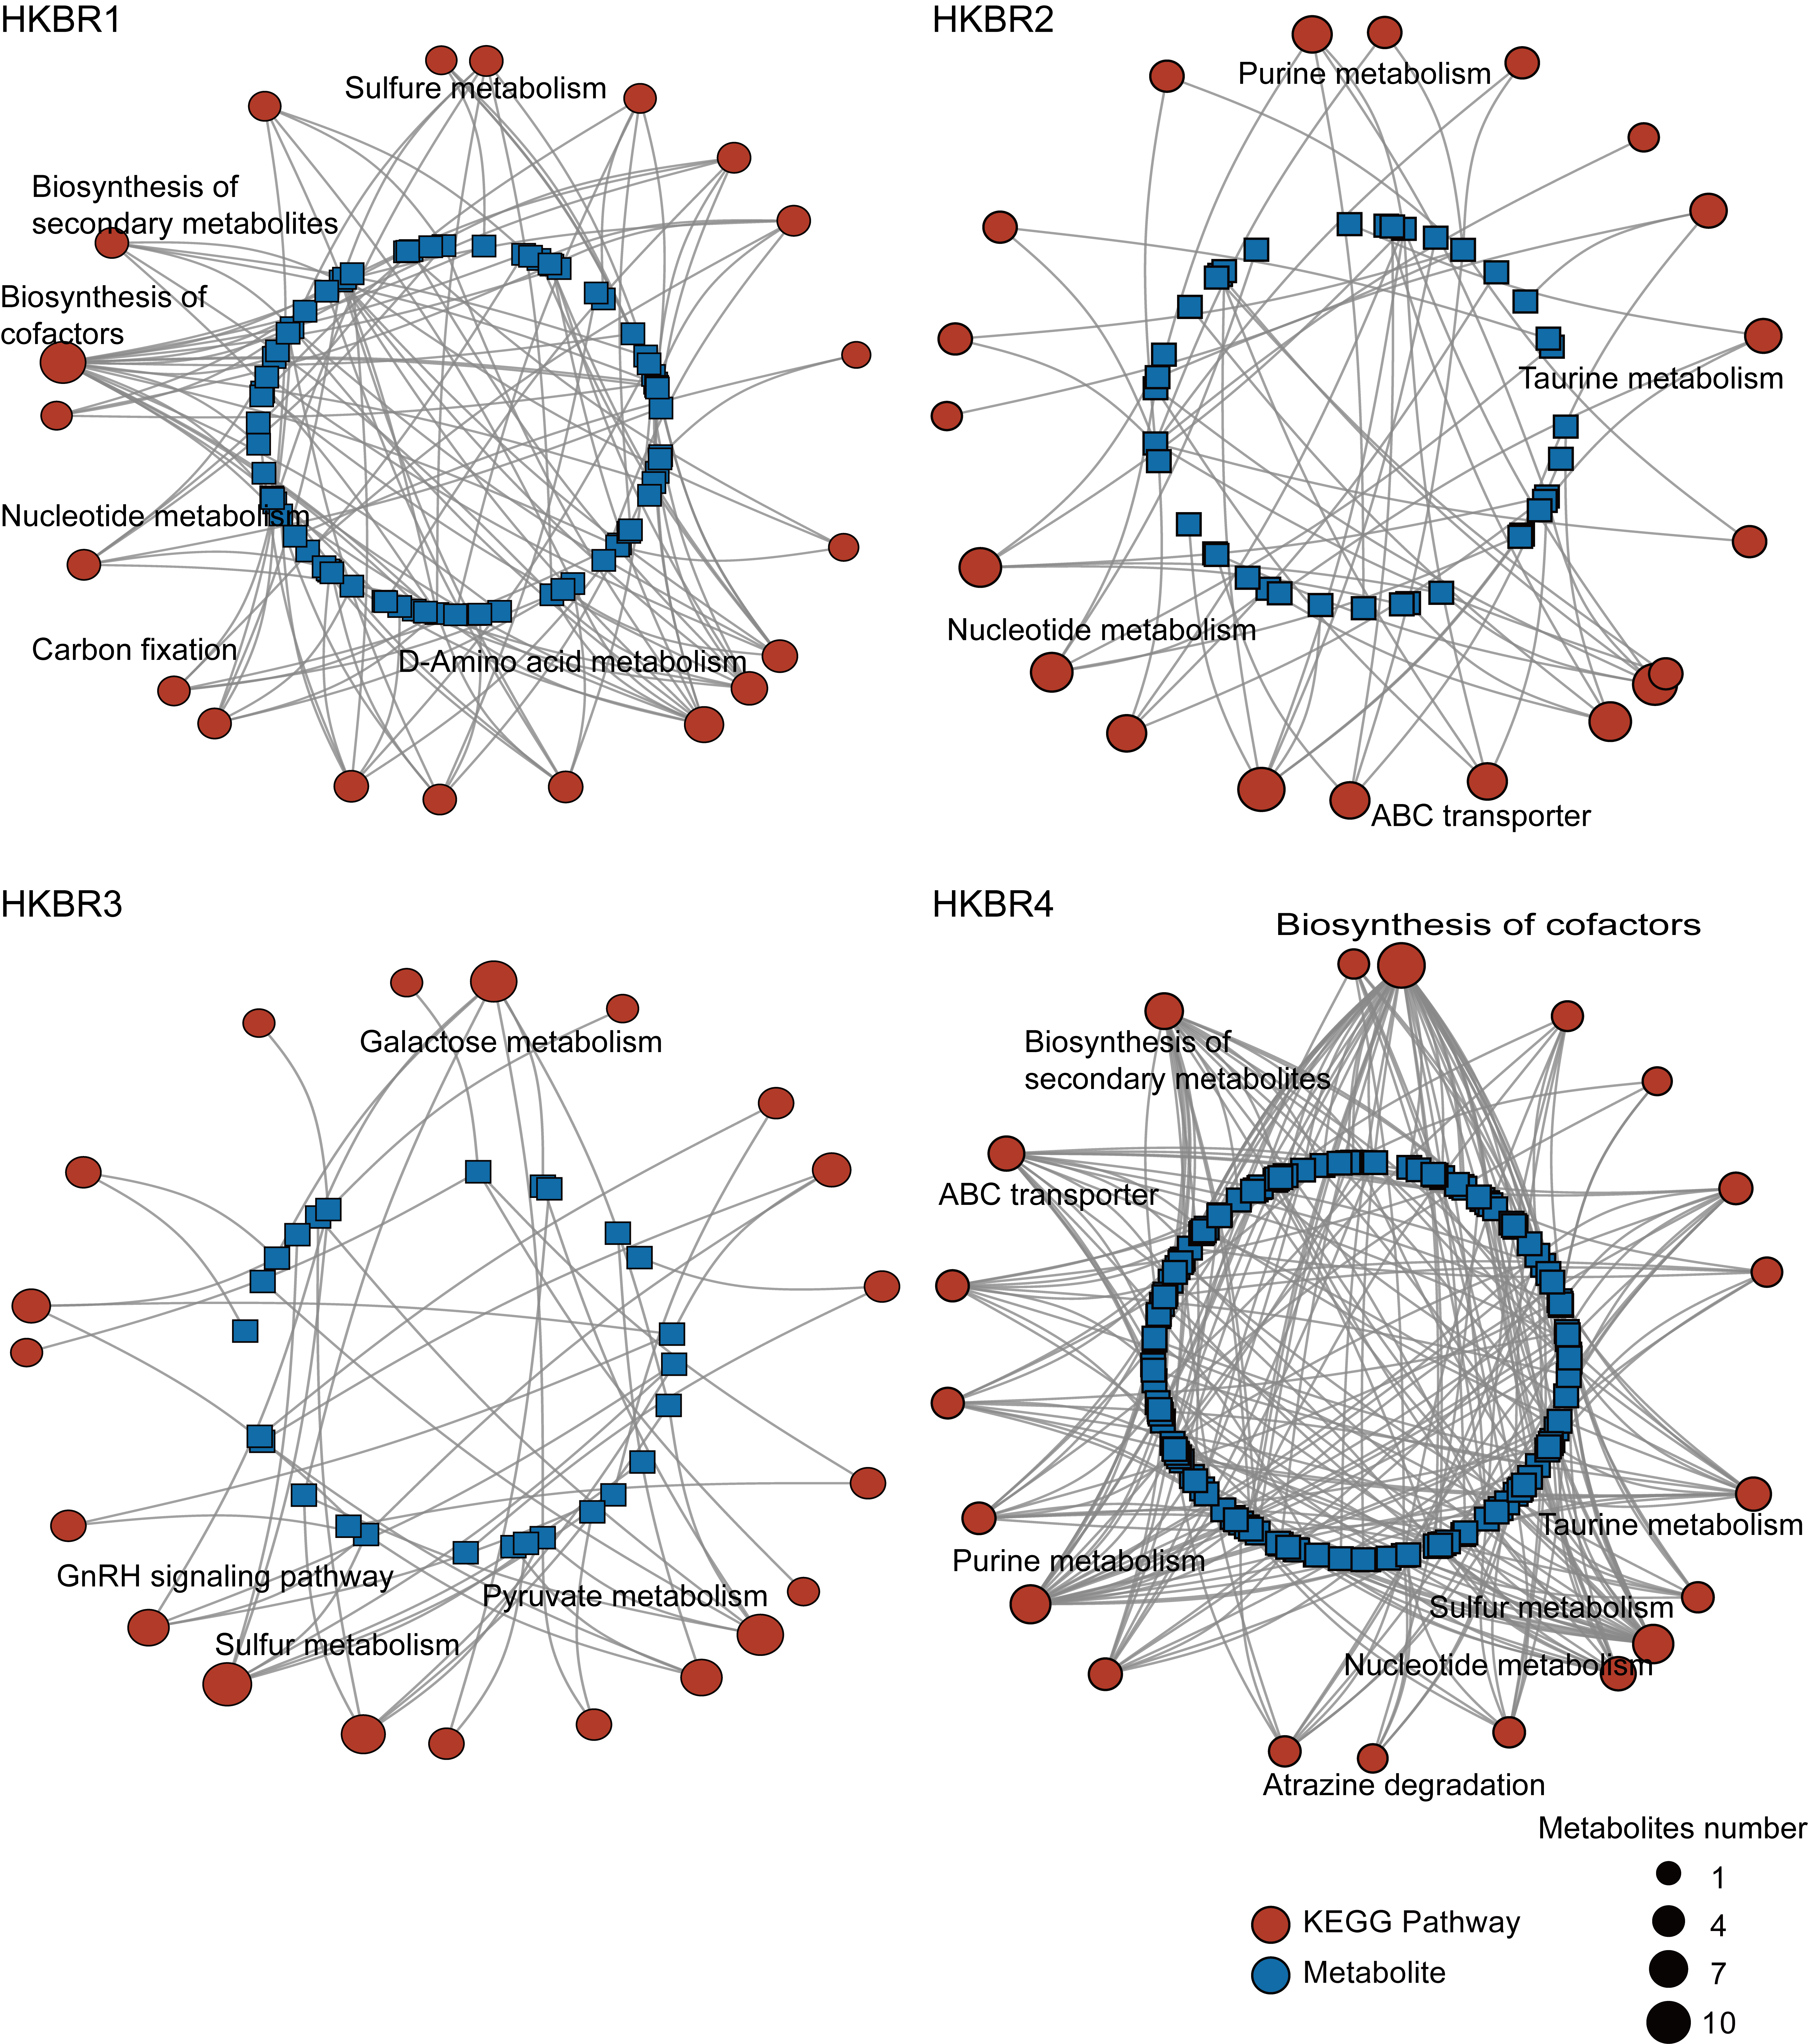


Figure S18 KEGG enrichment analysis network diagrams in SynCom HKB interference systems. Red represents KEGG pathways, and blue represents metabolites. The size represents the number of metabolites in the pathway.


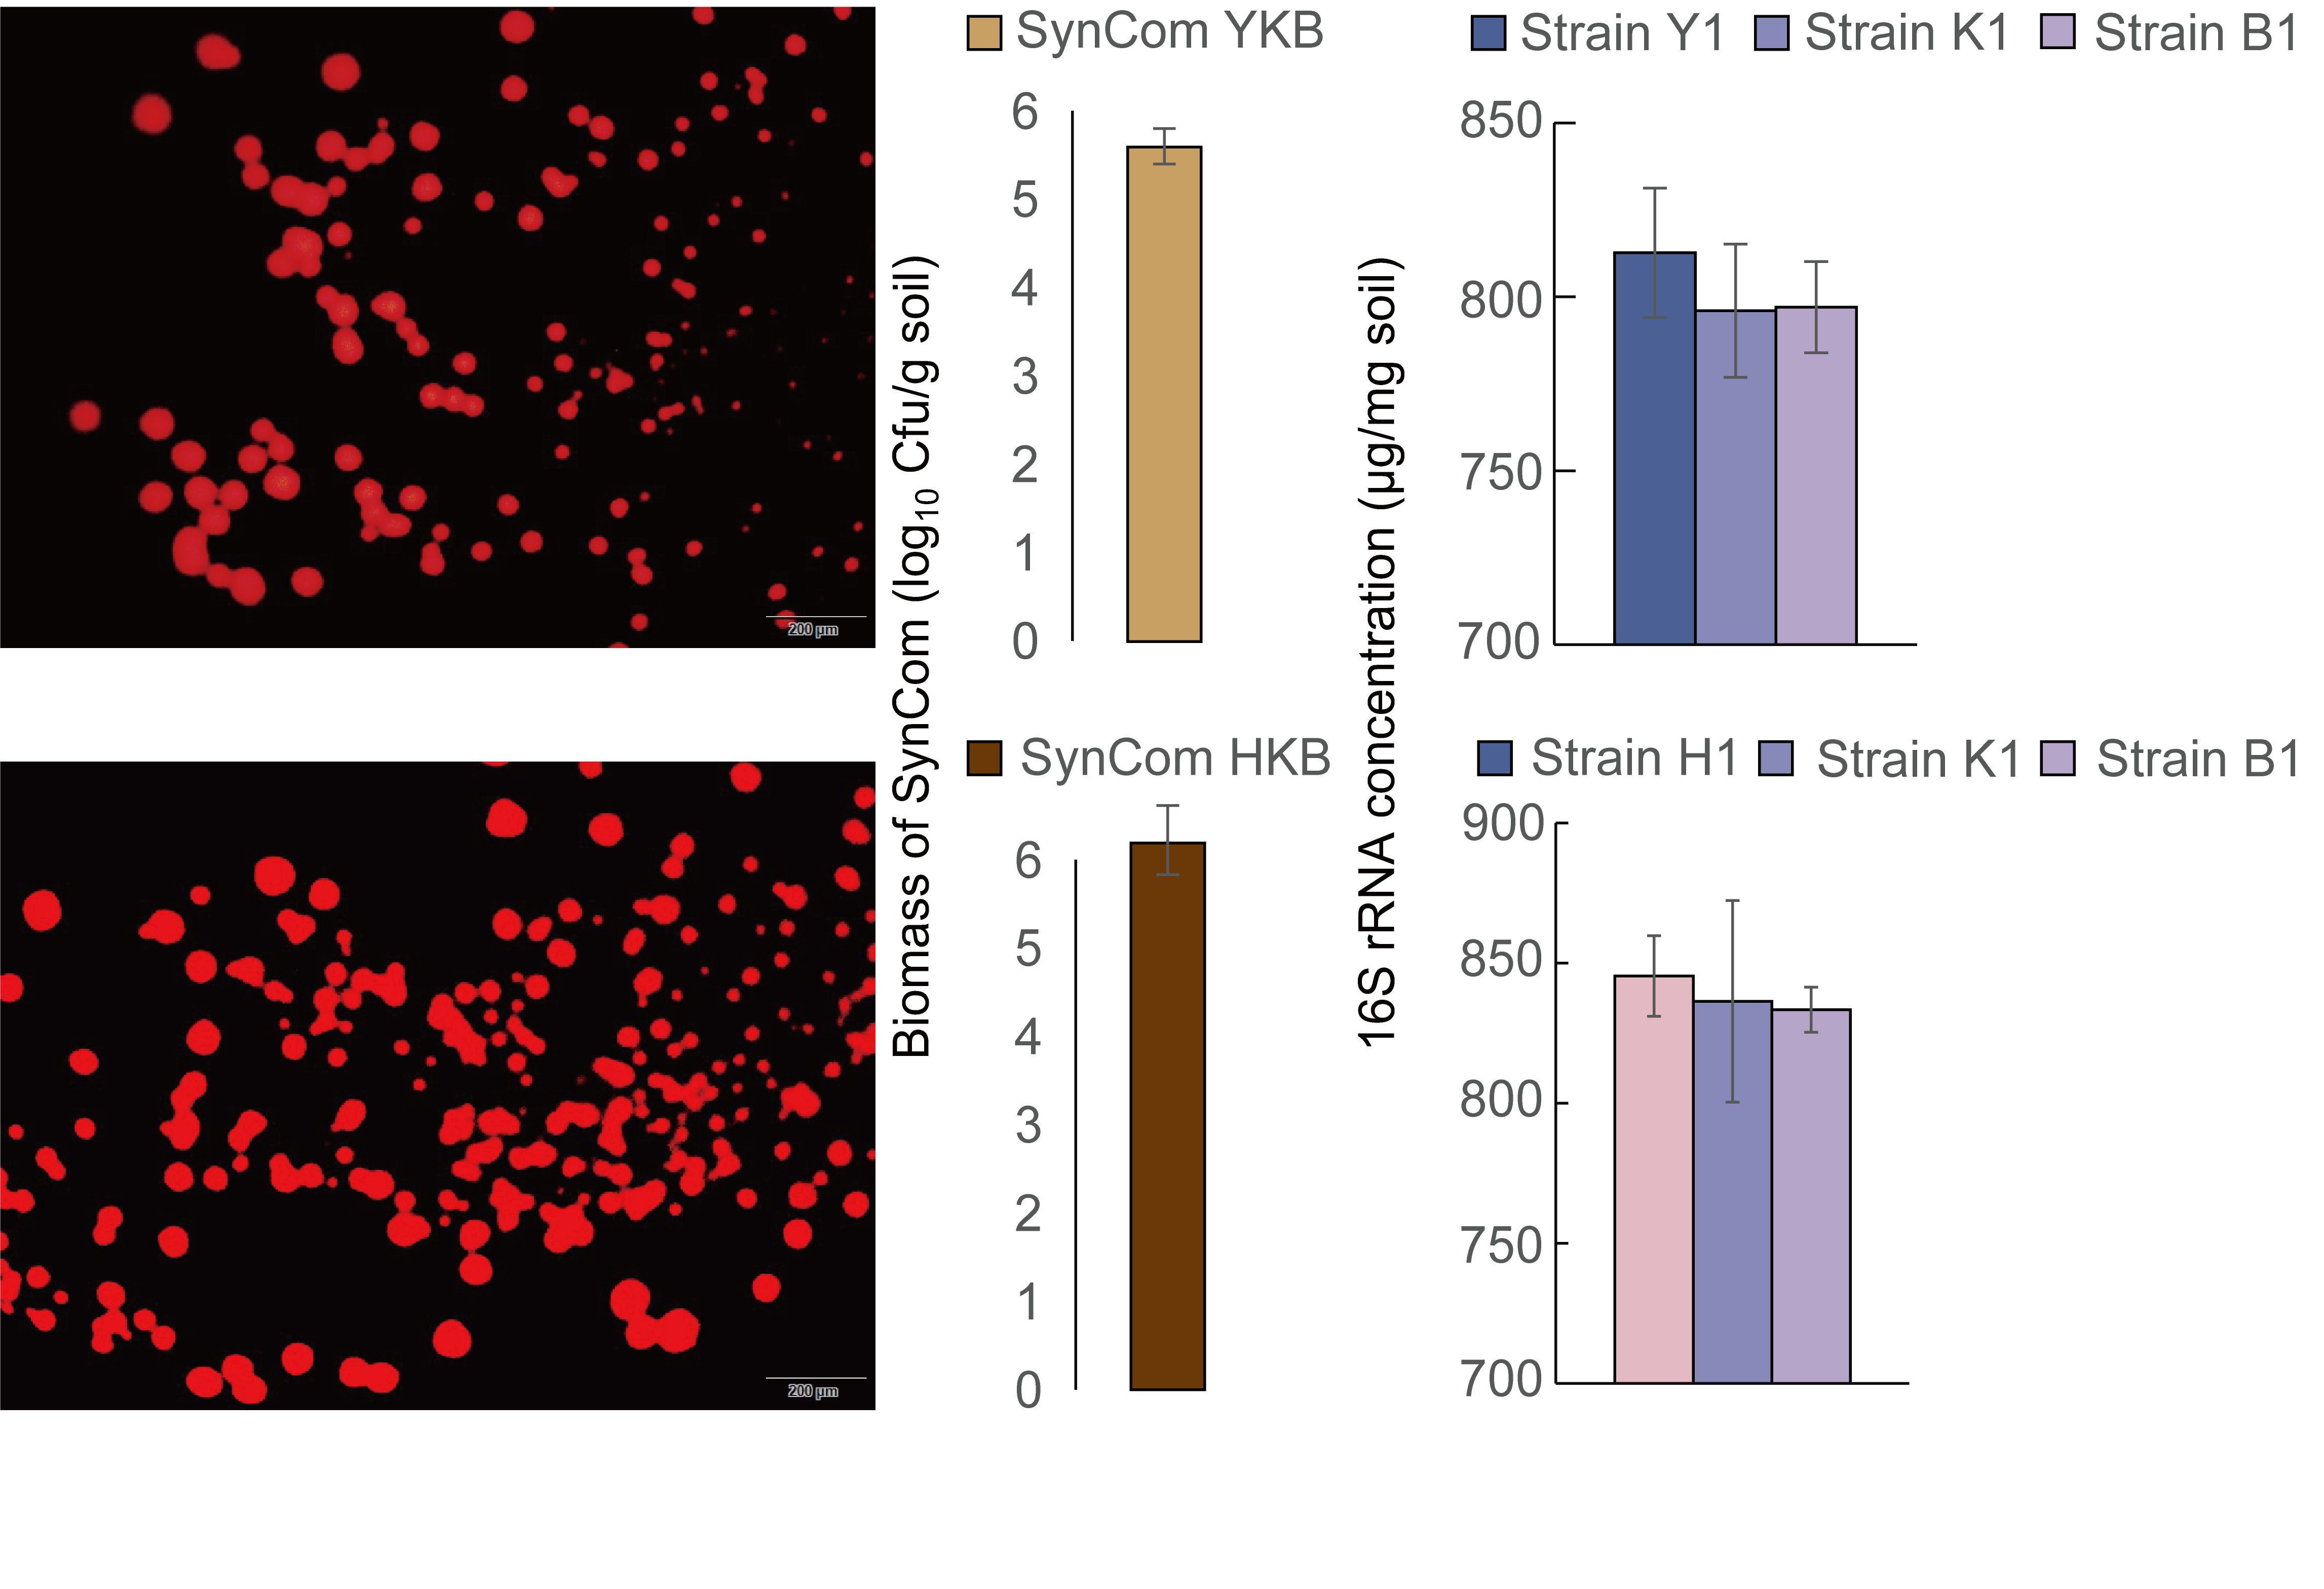


Figure S19 Colonisation status of the synthetic microbial community in black soil after 21 days.


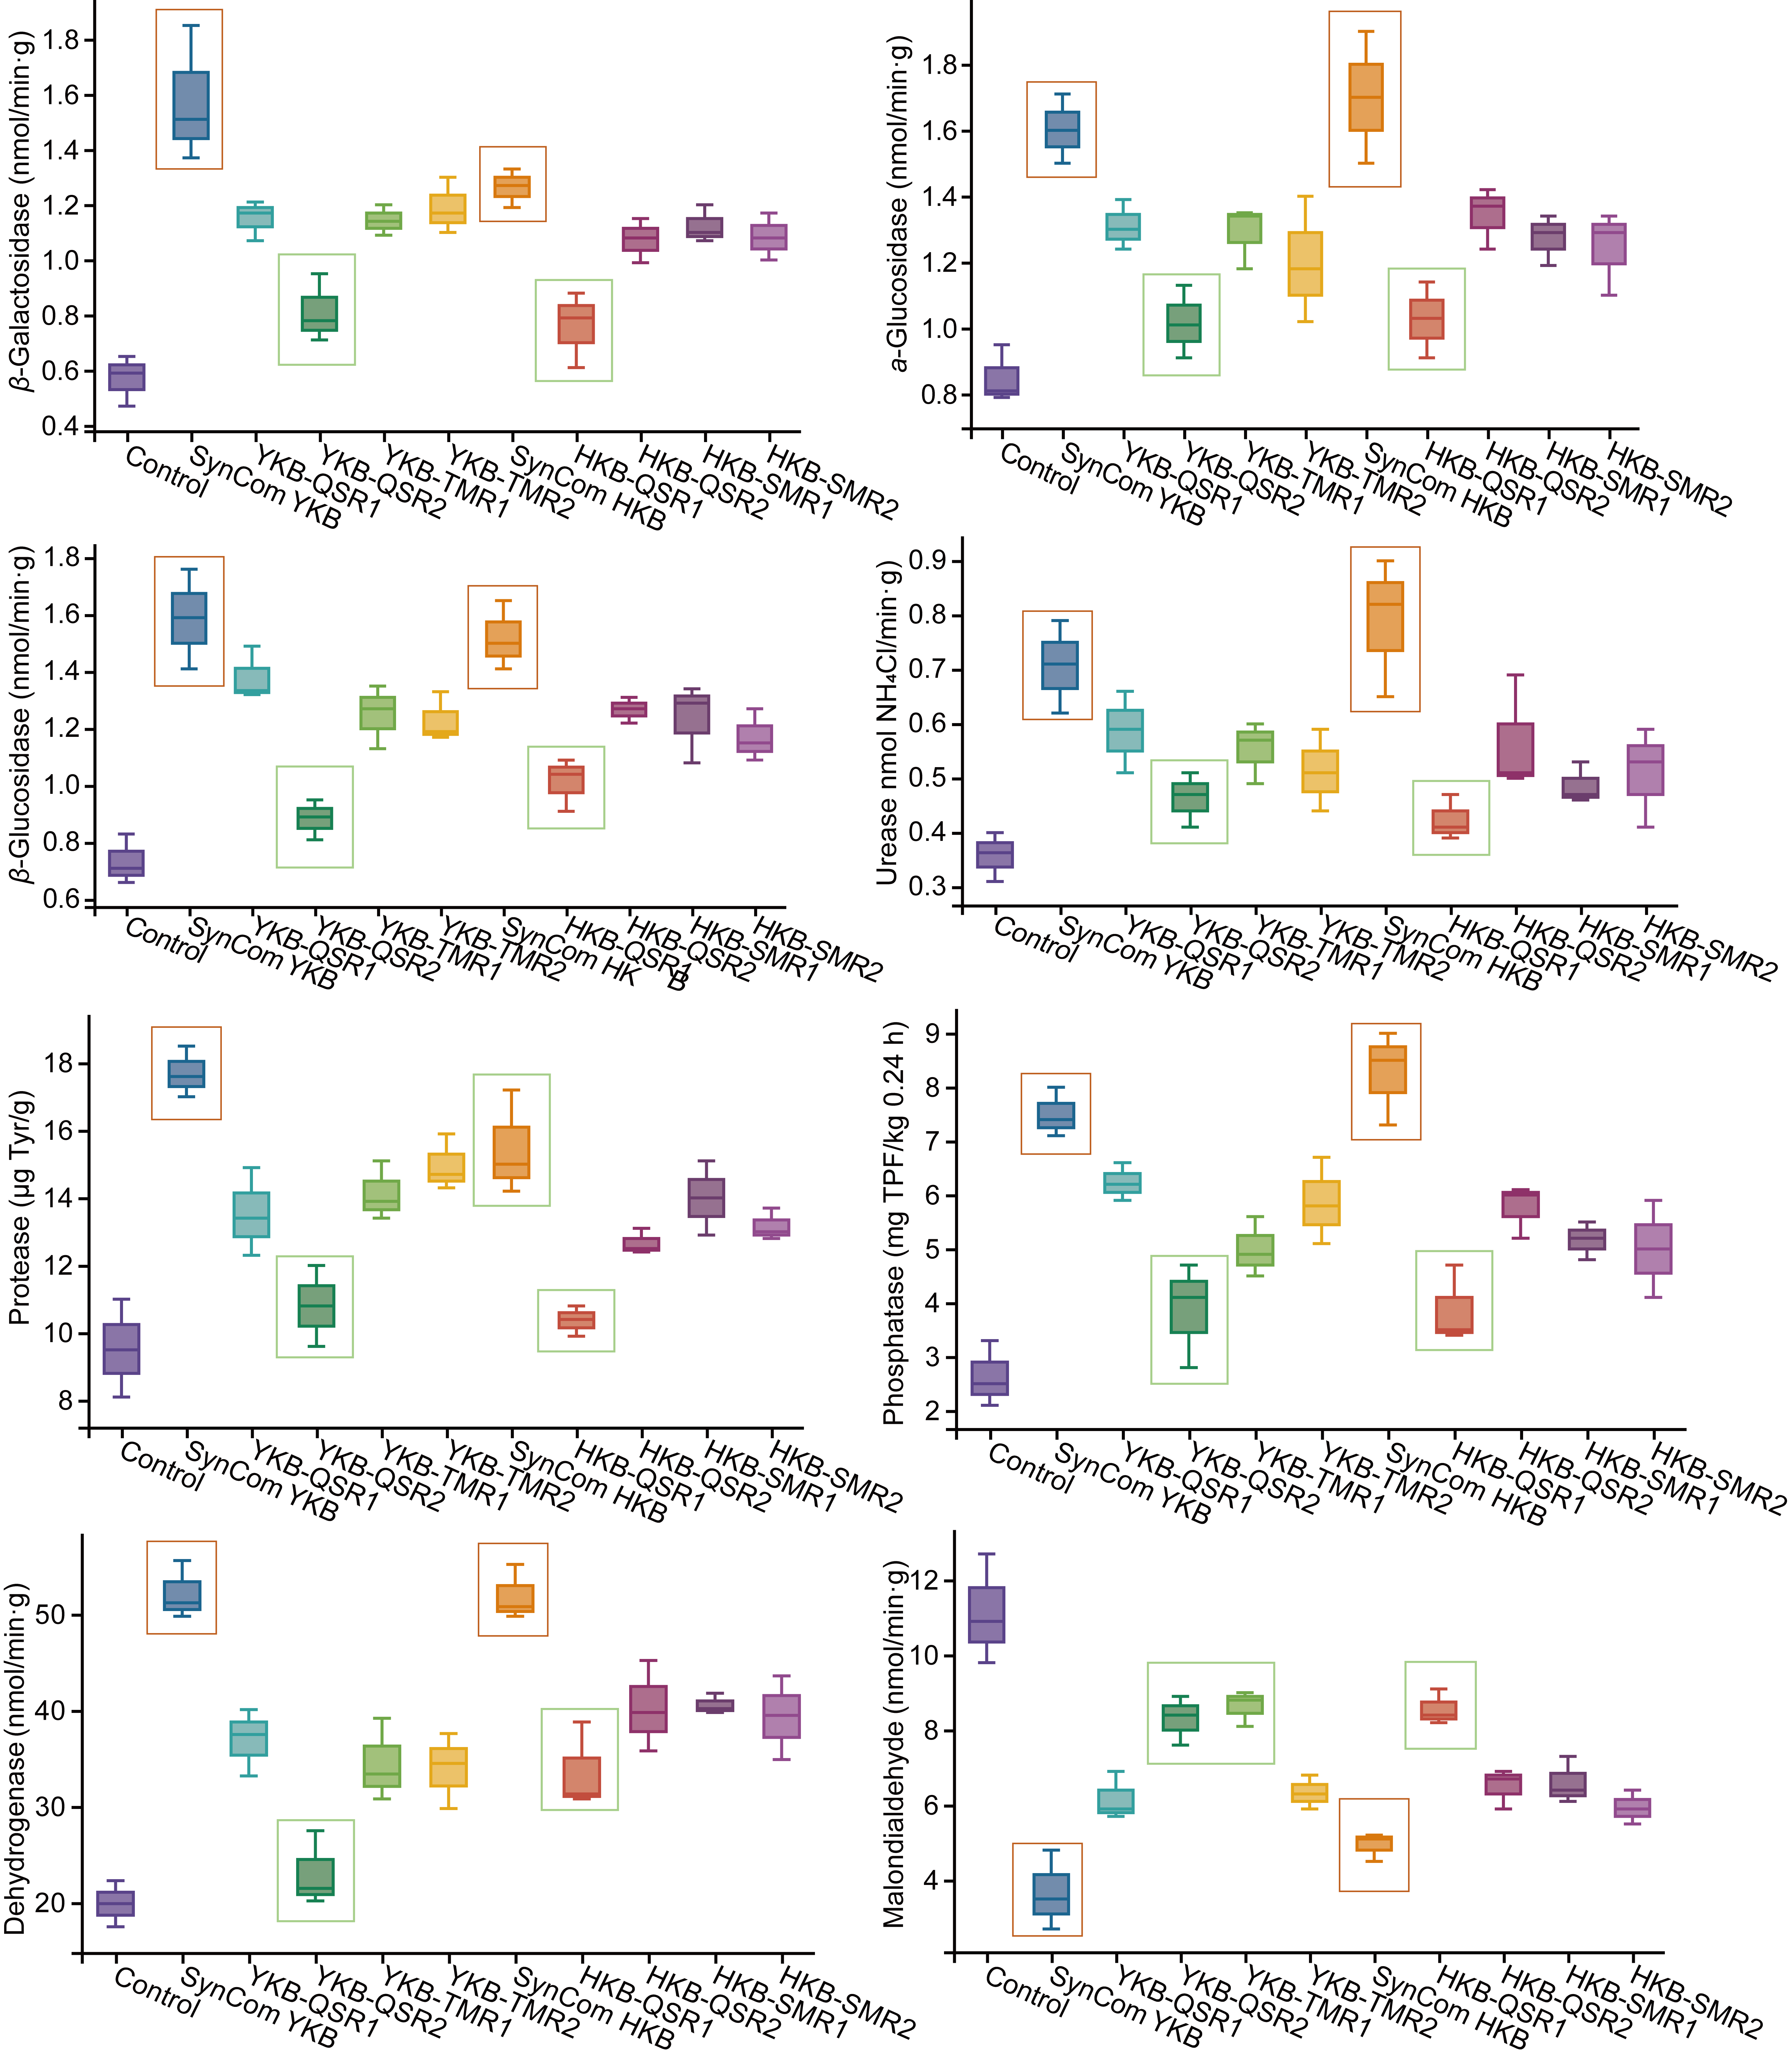


Figure S20 Enzyme activities in rhizosphere black soil among different treatment groups.


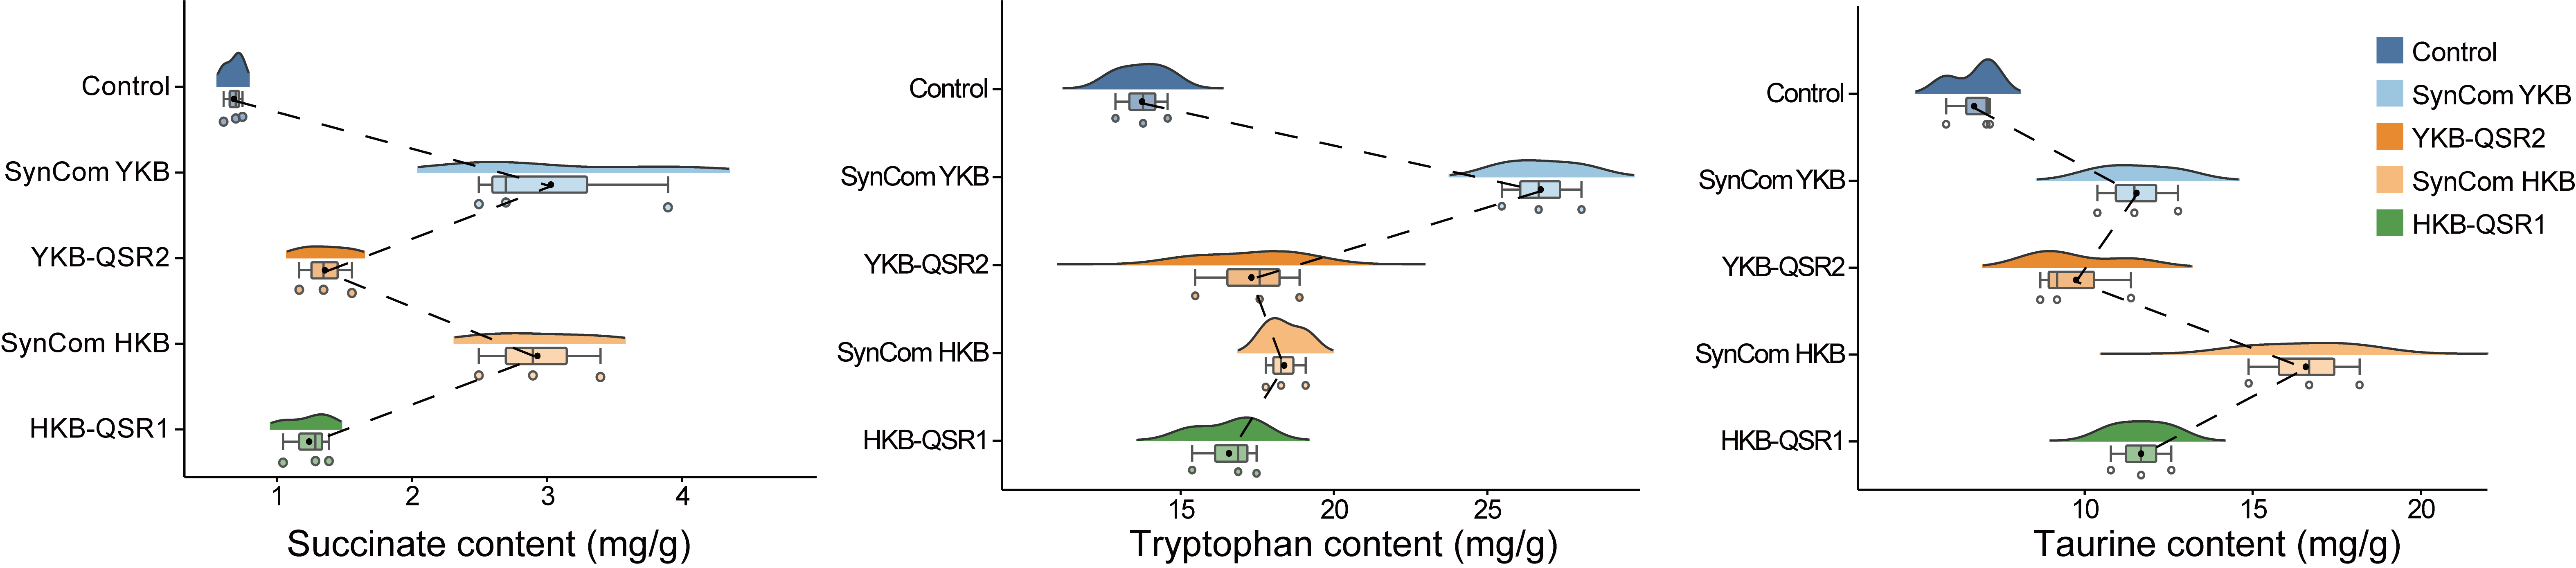


Figure S21 Differences in the content of key metabolites, succinate, tryptophan and taurine, in soils from different treatment groups.


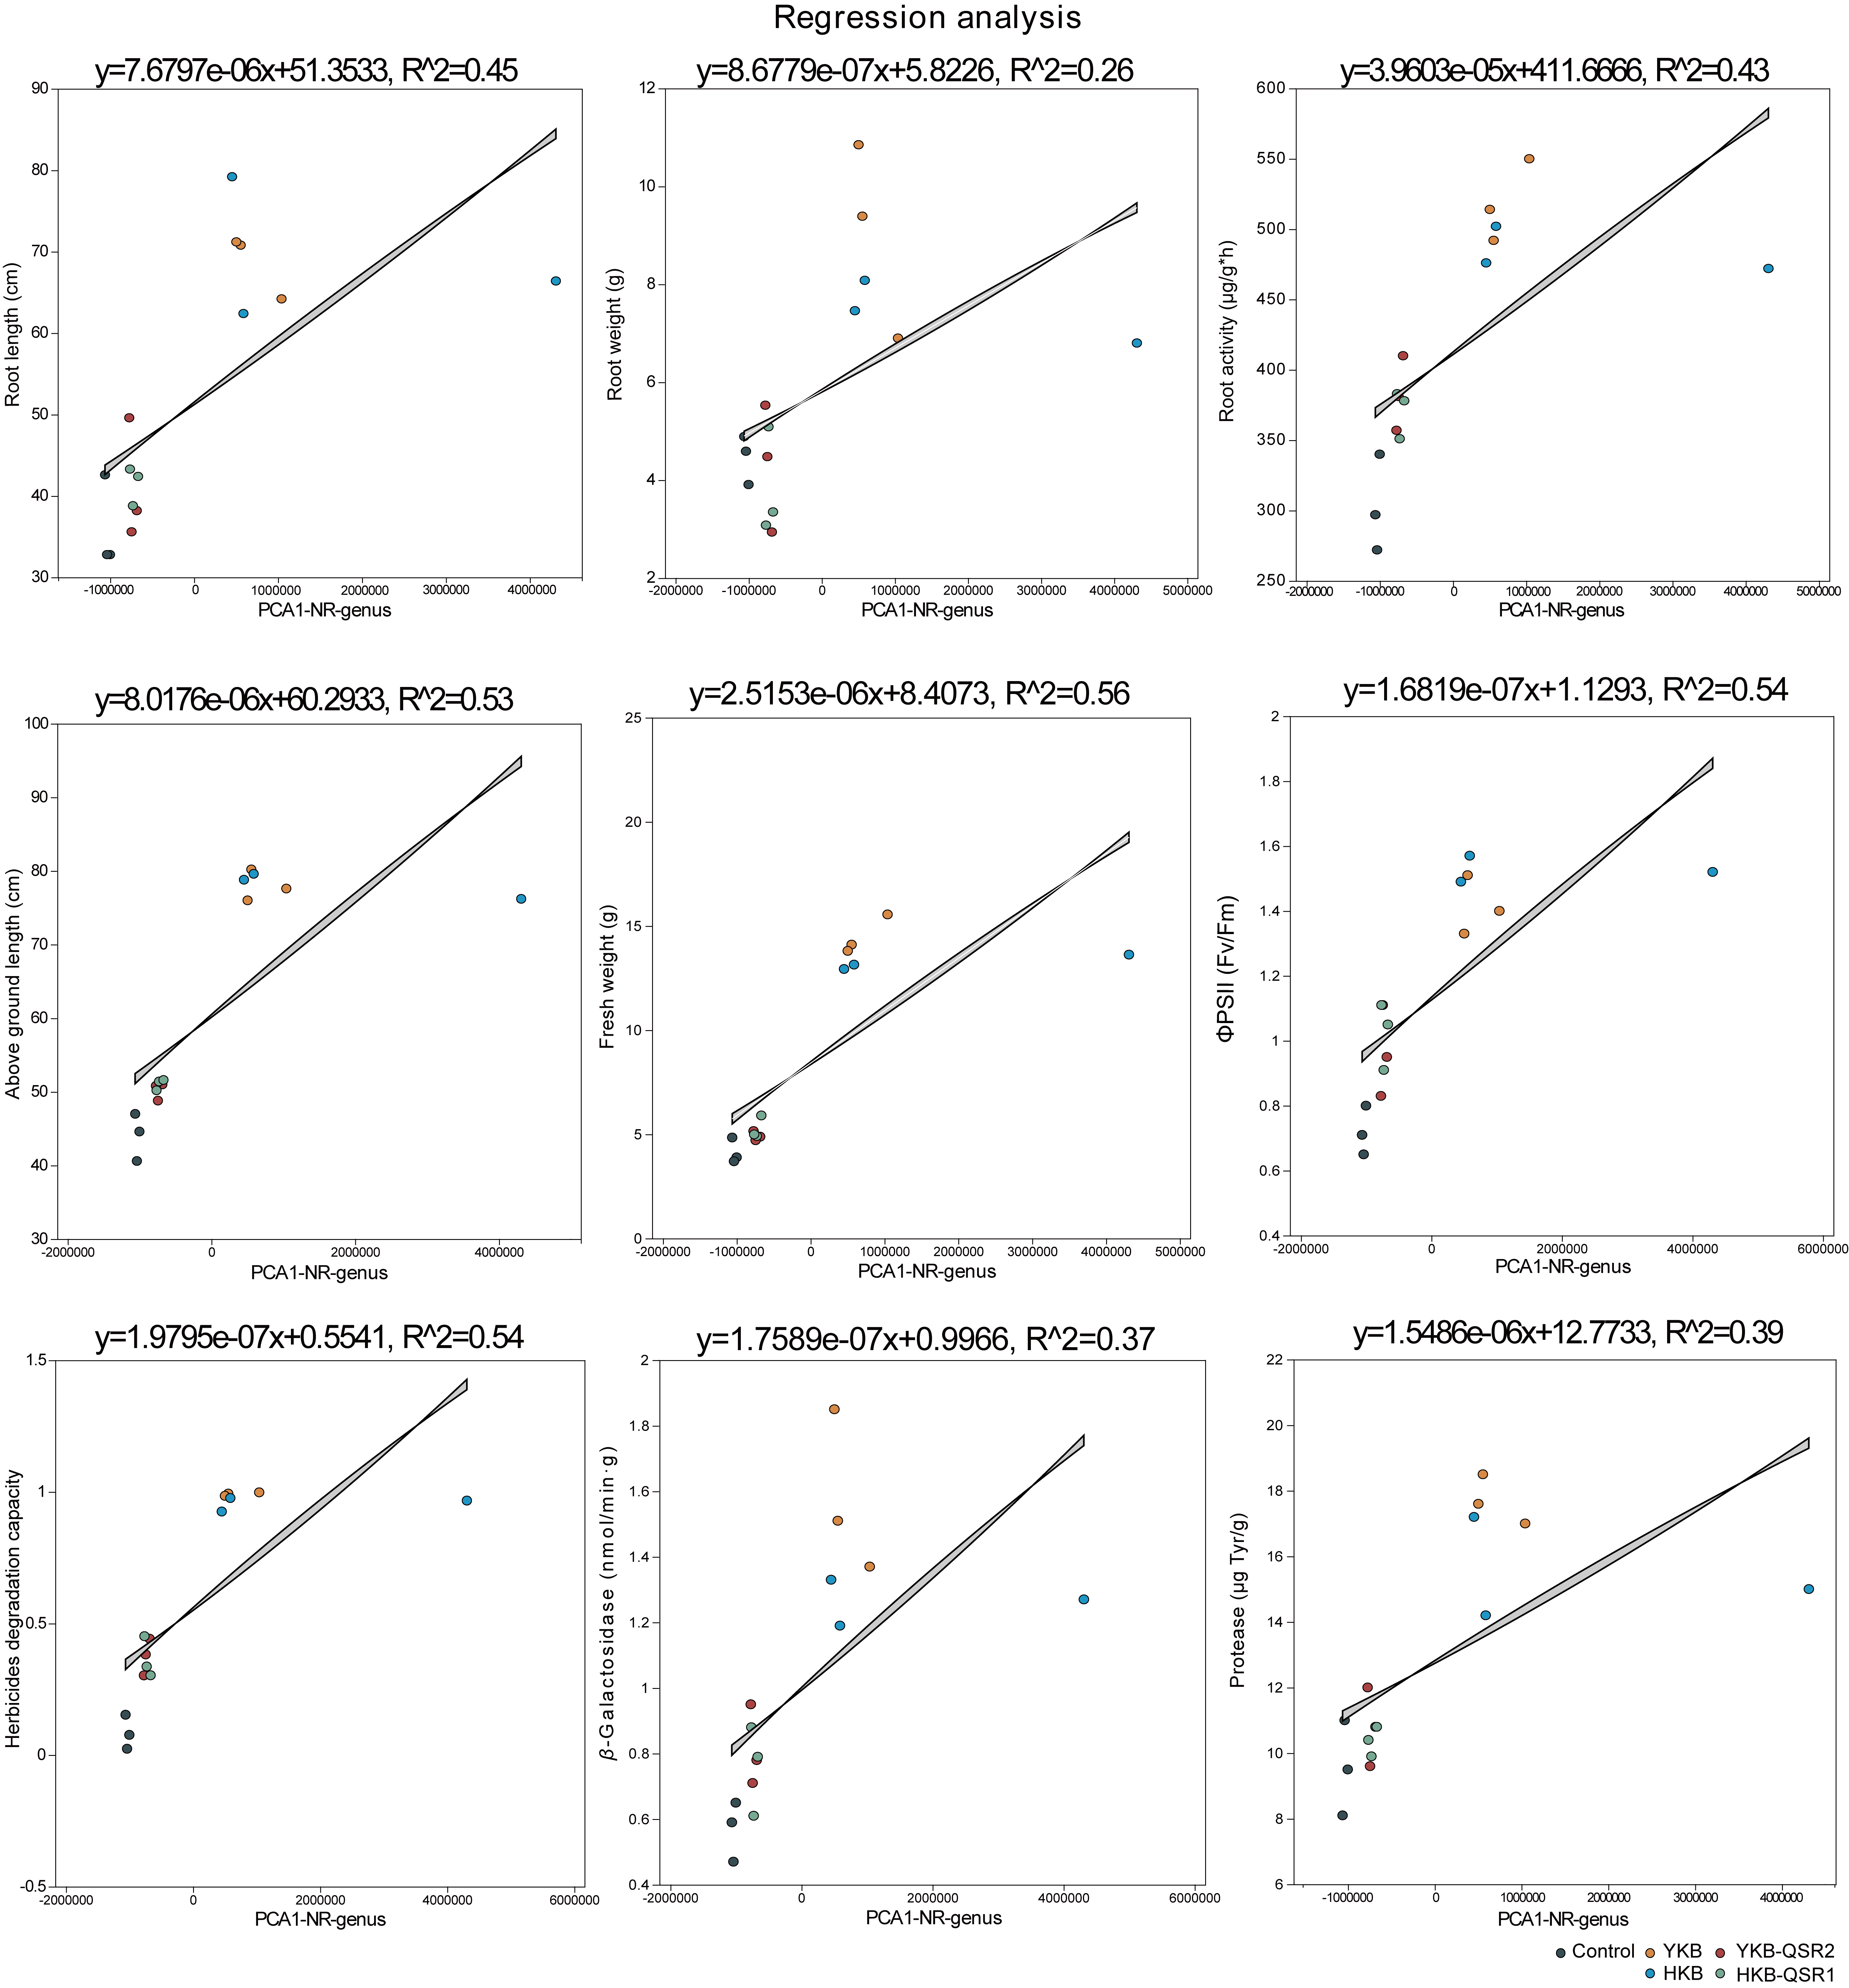


Figure S22 Linear regression analysis between *β*-diversity of taxonomic in metagenomics and environmental factors in maize pot culture. R2 is the coefficient of determination, representing the proportion of variation explained by the regression line.


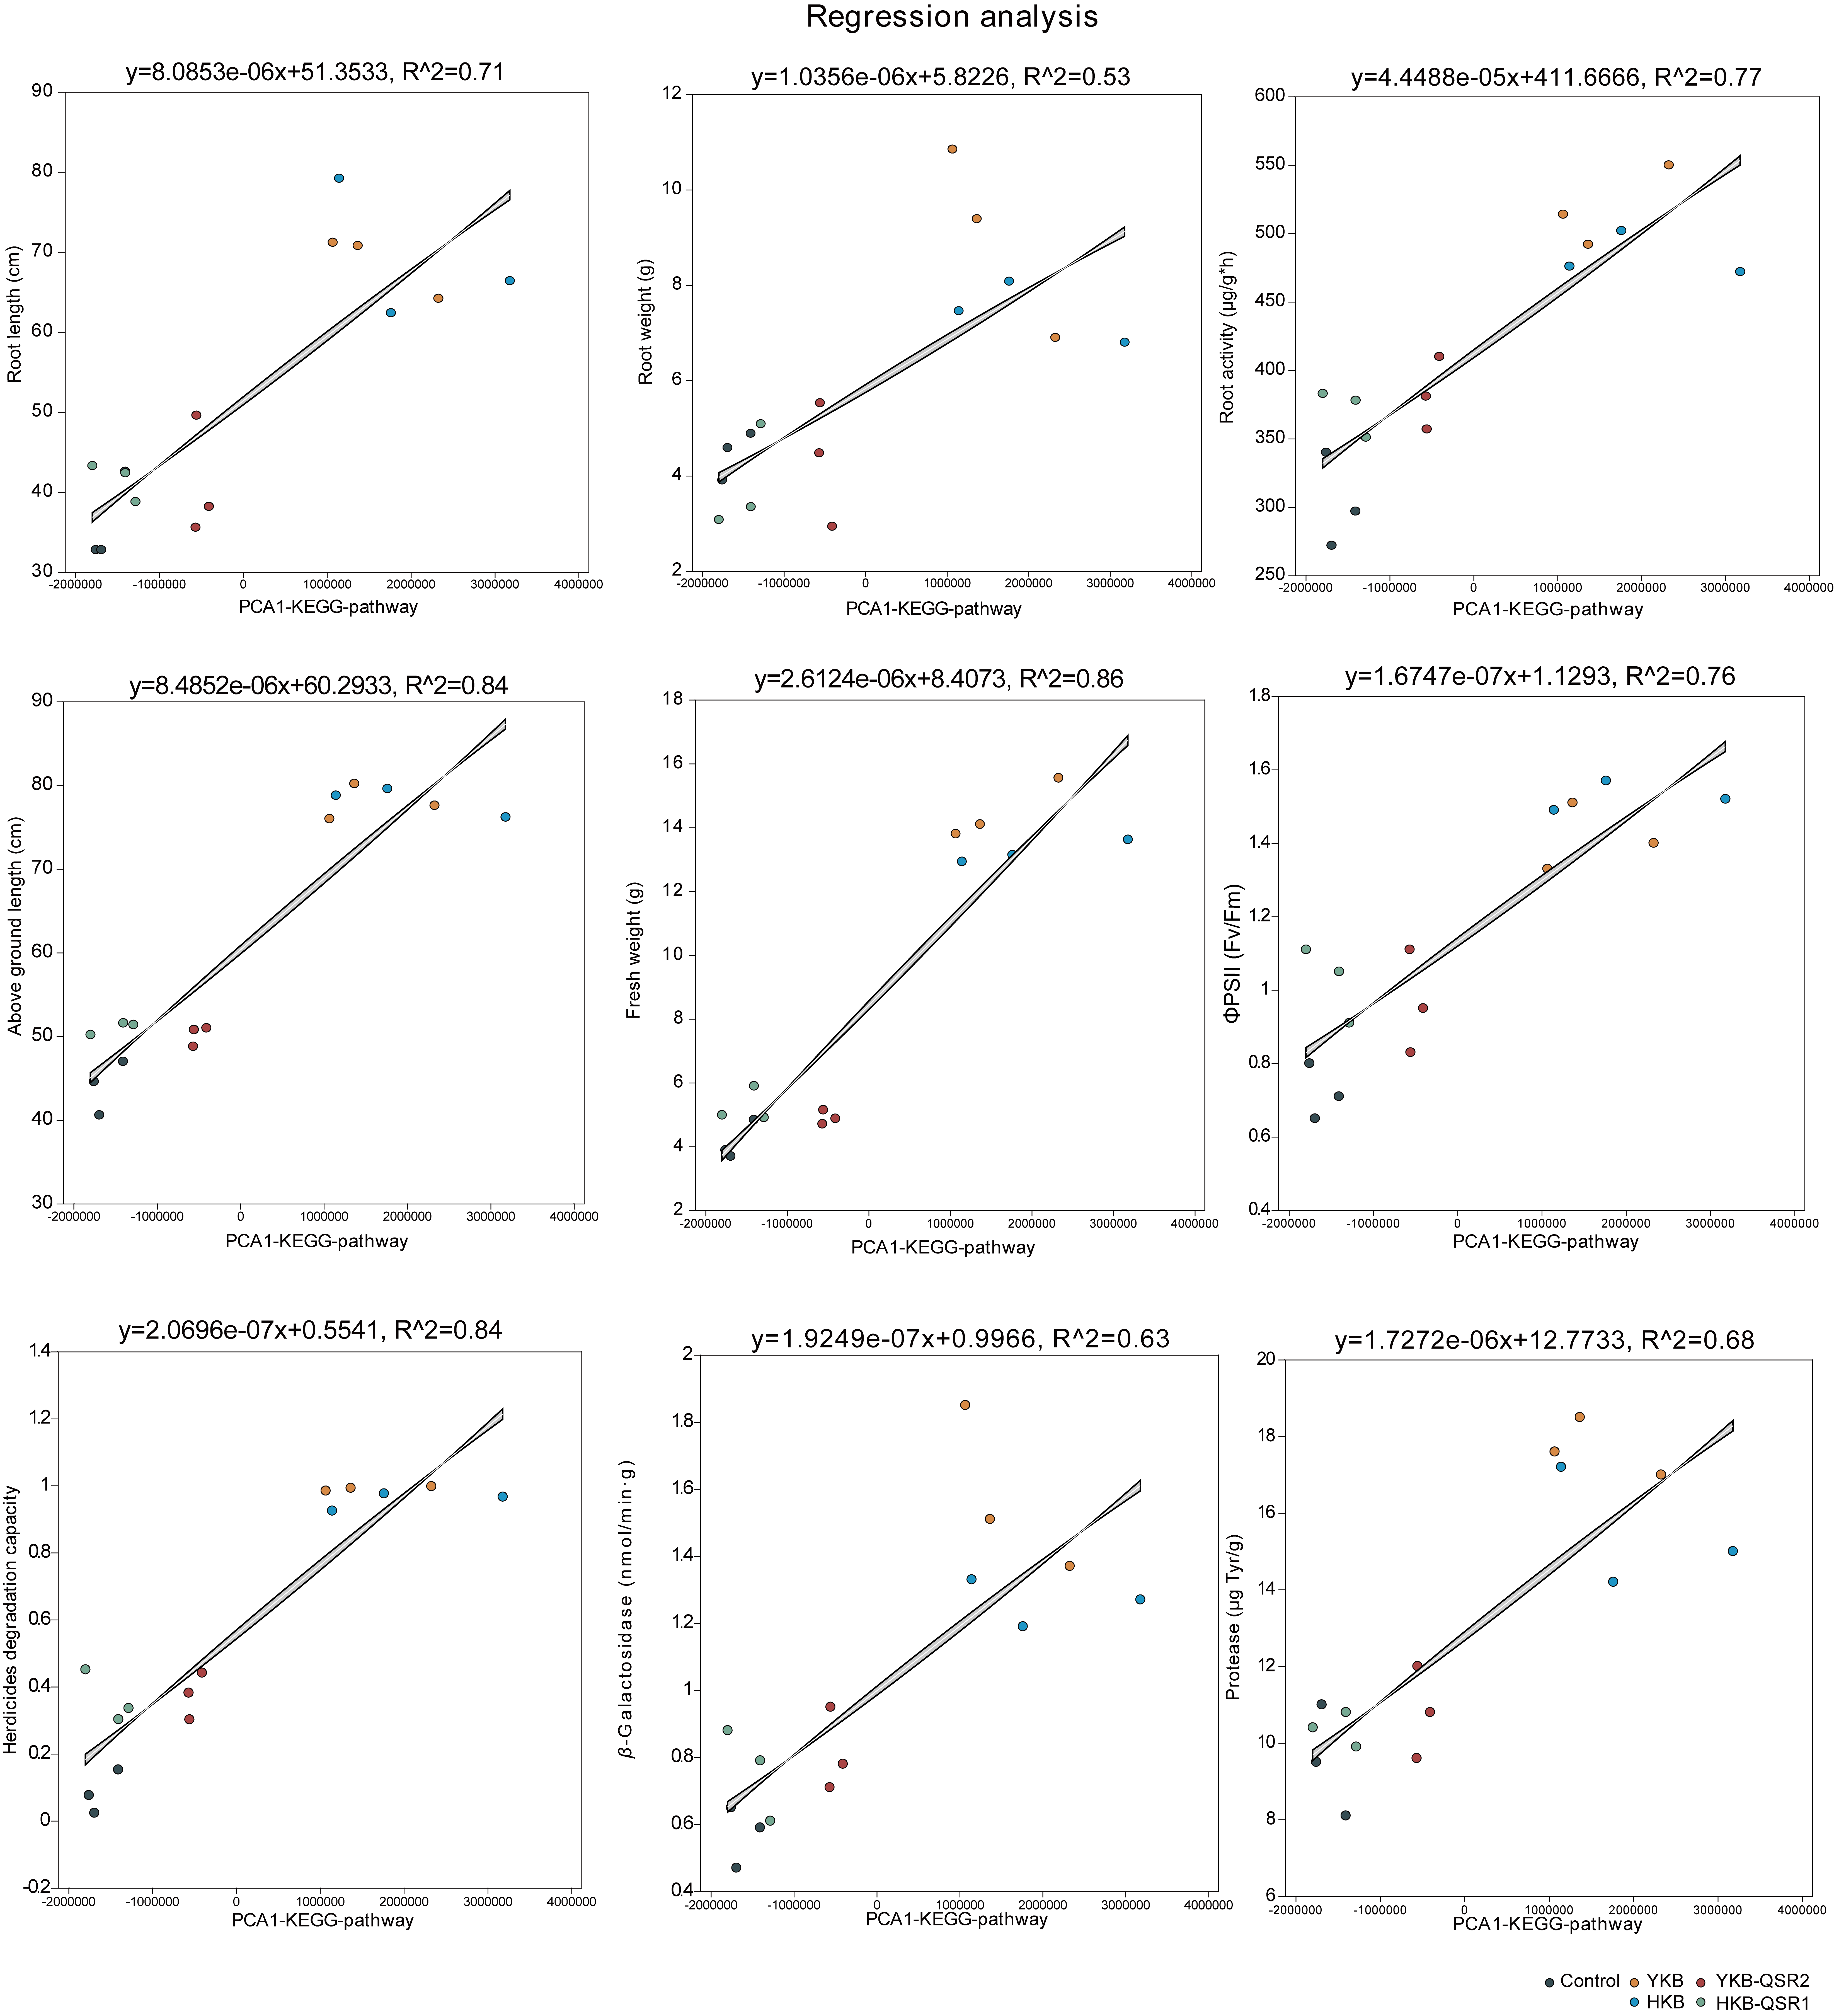


Figure S23 Linear regression analysis between *β*-diversity of KEGG pathway in metagenomics and environmental factors in maize pot culture. R2 is the coefficient of determination, representing the proportion of variation explained by the regression line.


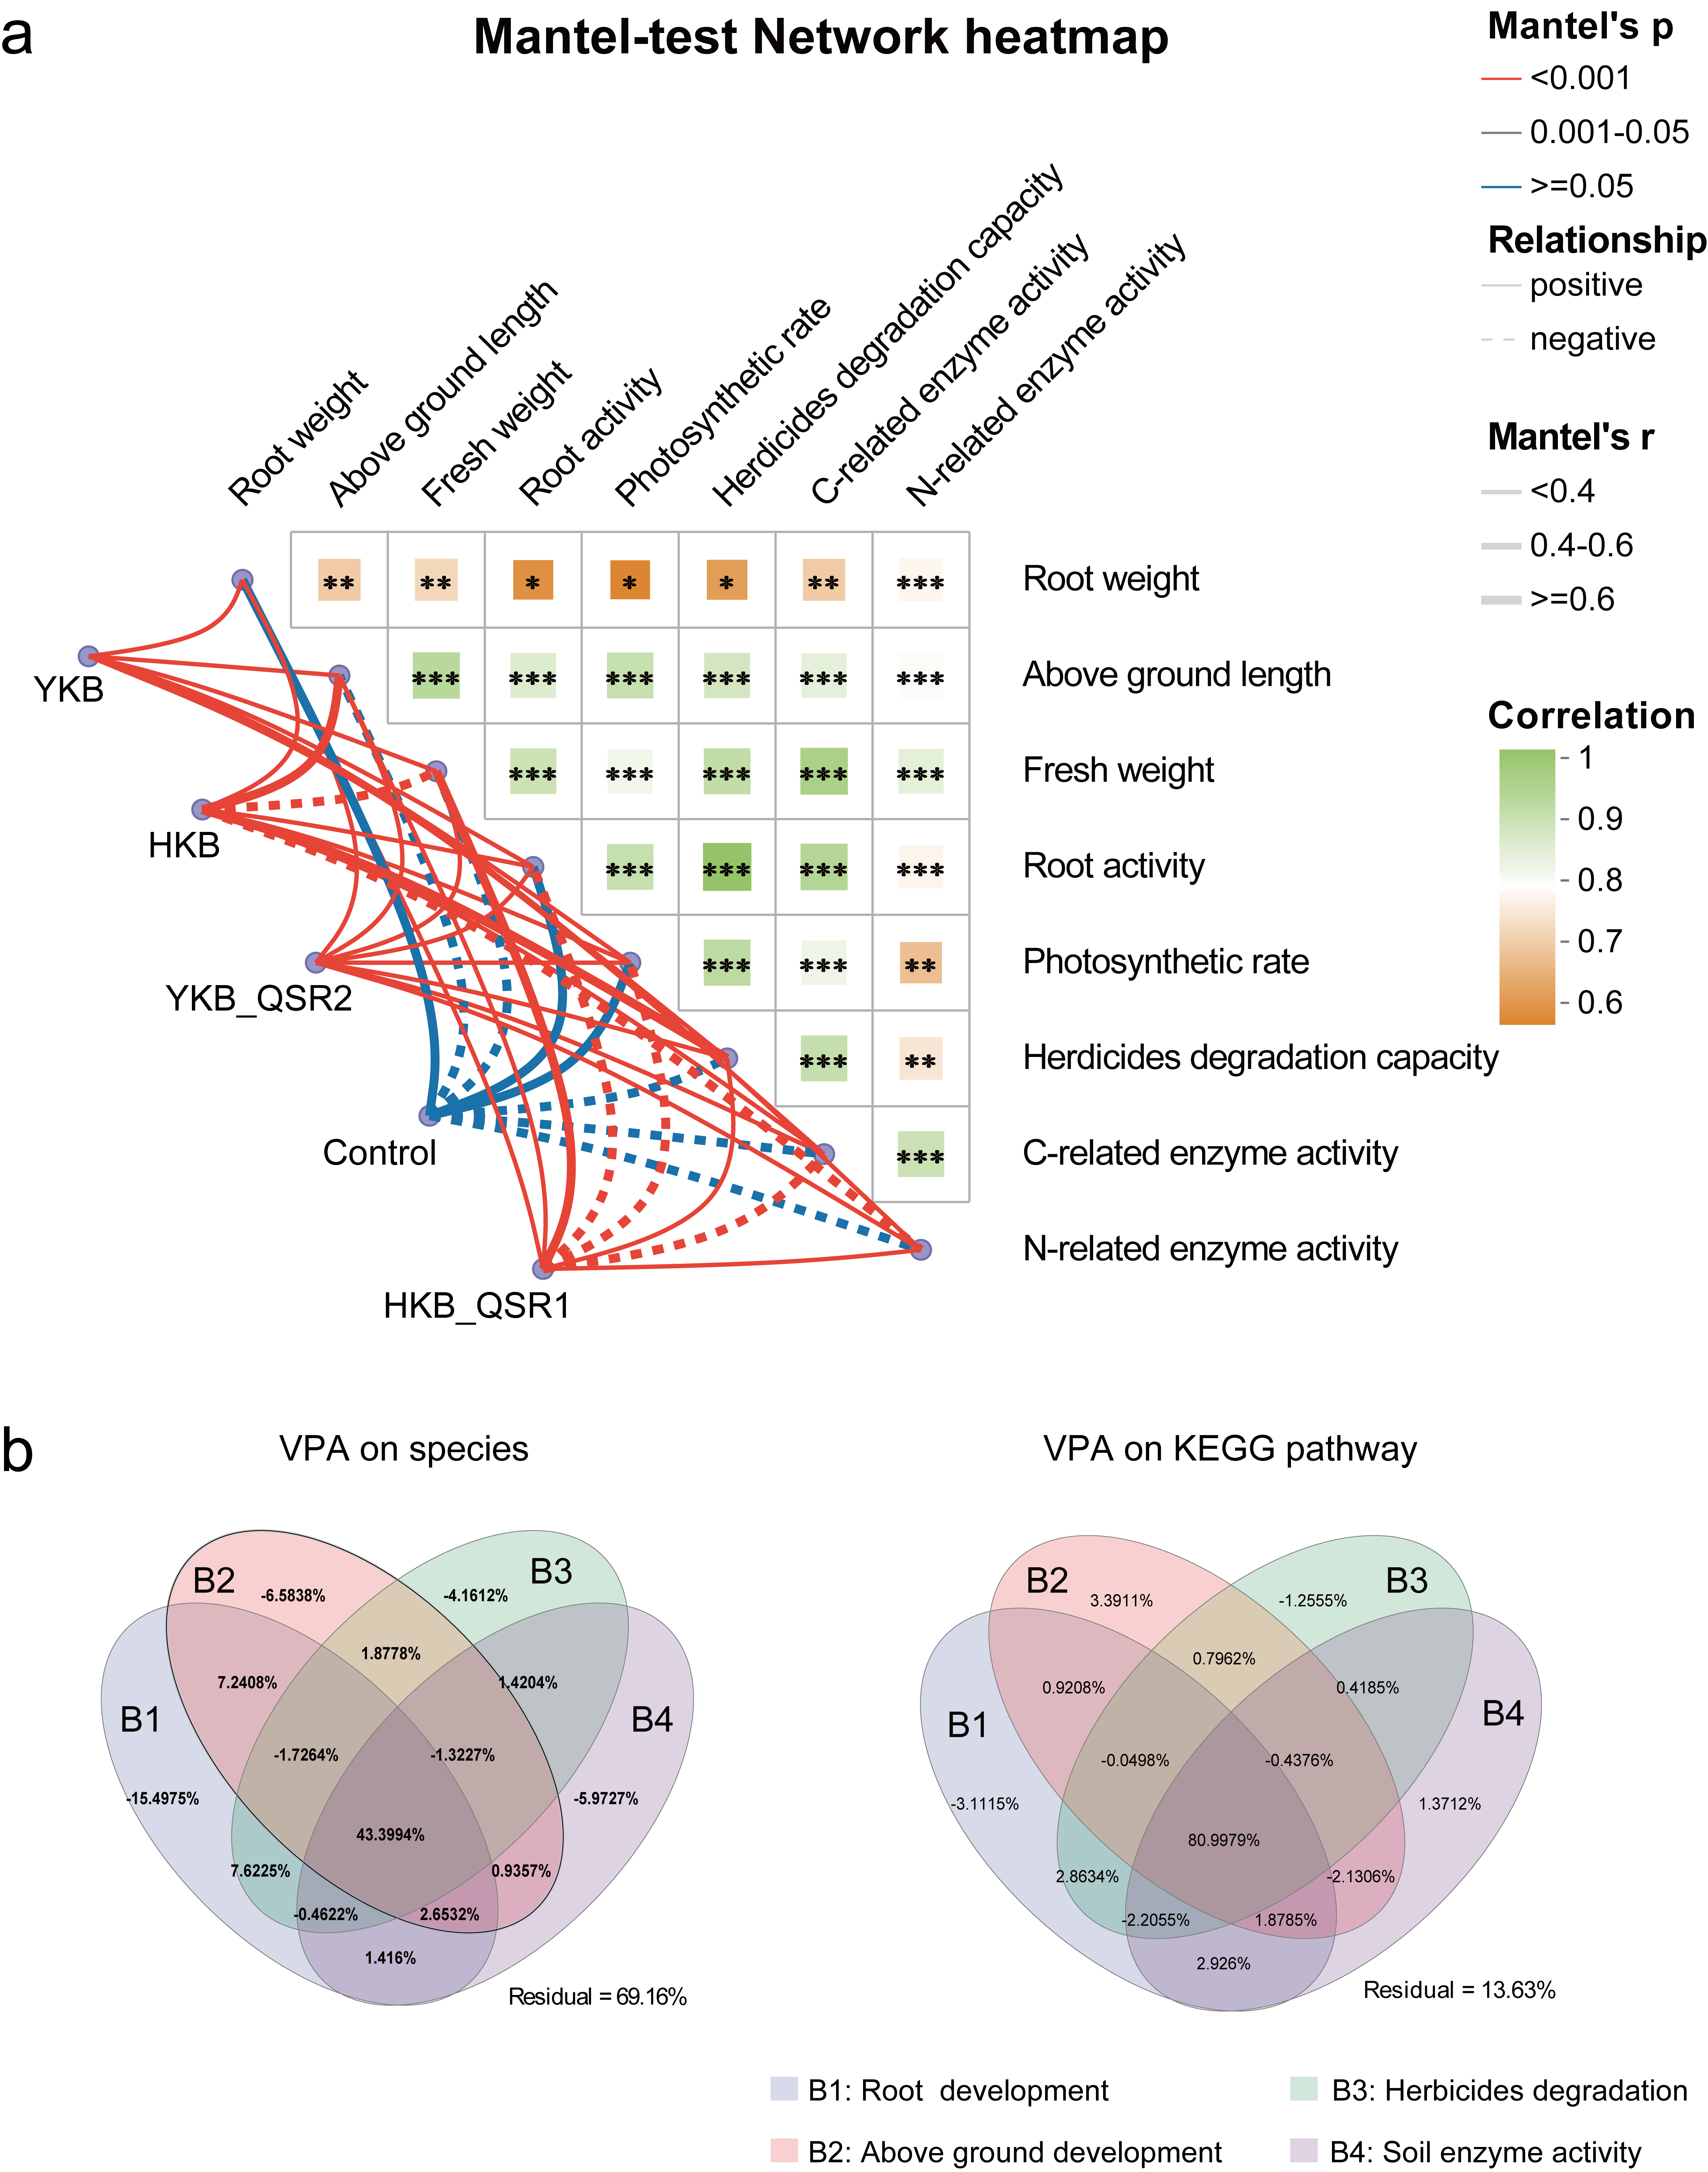


Figure S24 Correlations between environmental factors and metagenomic profiles in different treatment groups. (a) Mantel test analysis of taxonomic composition and environmental factors in different treatment groups. The community distance matrix algorithm was bray-curits. The environmental factor matrix algorithm was euclidean, and the correlation coefficient was Spearman. The network lines represent the correlation between communities and environmental factors, and the heat map represents the correlation between environmental factors. The thickness of the lines indicates the strength of the correlation between the community and environmental factors, calculated using Mantel’s r. Different colors in the heatmap represent positive or negative correlations, with darker colors indicating stronger correlations. The asterisks in the color blocks indicate significance: * 0.01< *p* ≤ 0.05, ** 0.001< *p* ≤0.01, *** *p* ≤ 0.001. (b) The explanatory power of environmental factors on microbial community and functional differences by Variance Partitioning Analysis (VPA). Residuals represent the remaining explanatory power that cannot be explained by the above environmental factors.


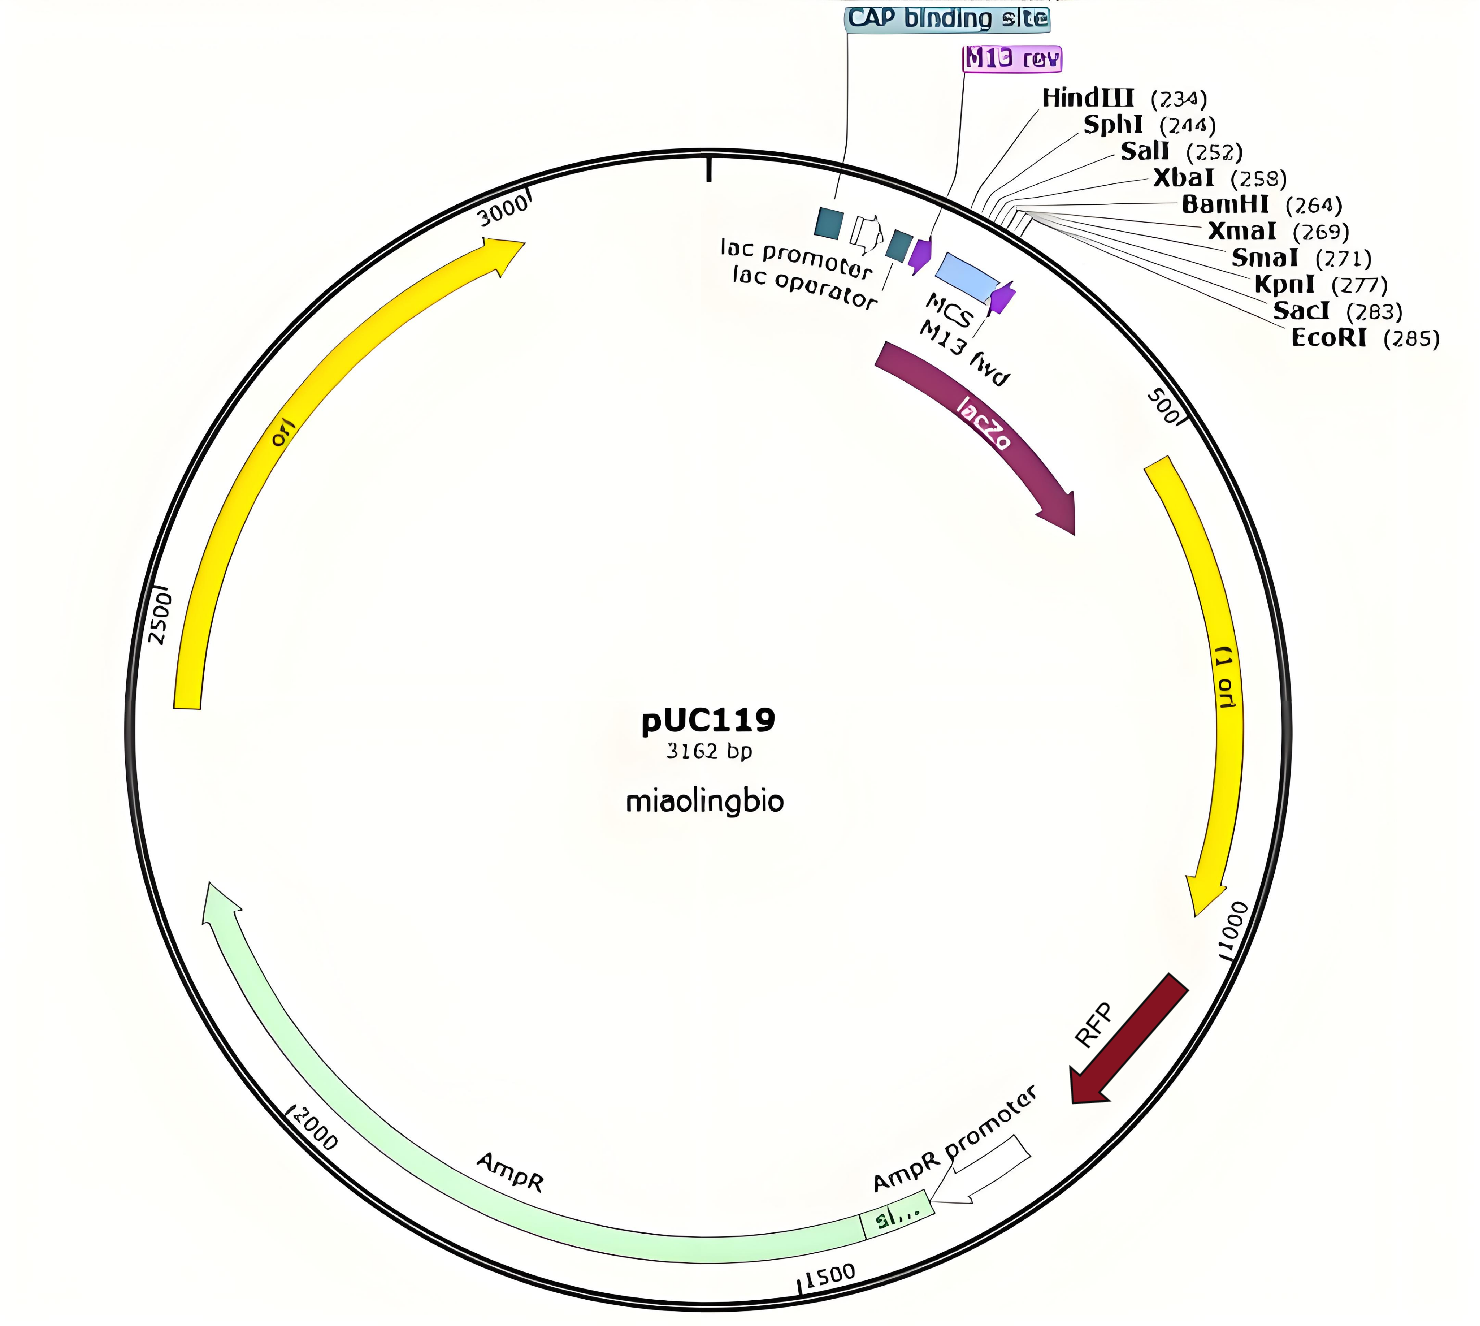


Figure S25 Schematic map of plasmid pUC119 for RNA interference.


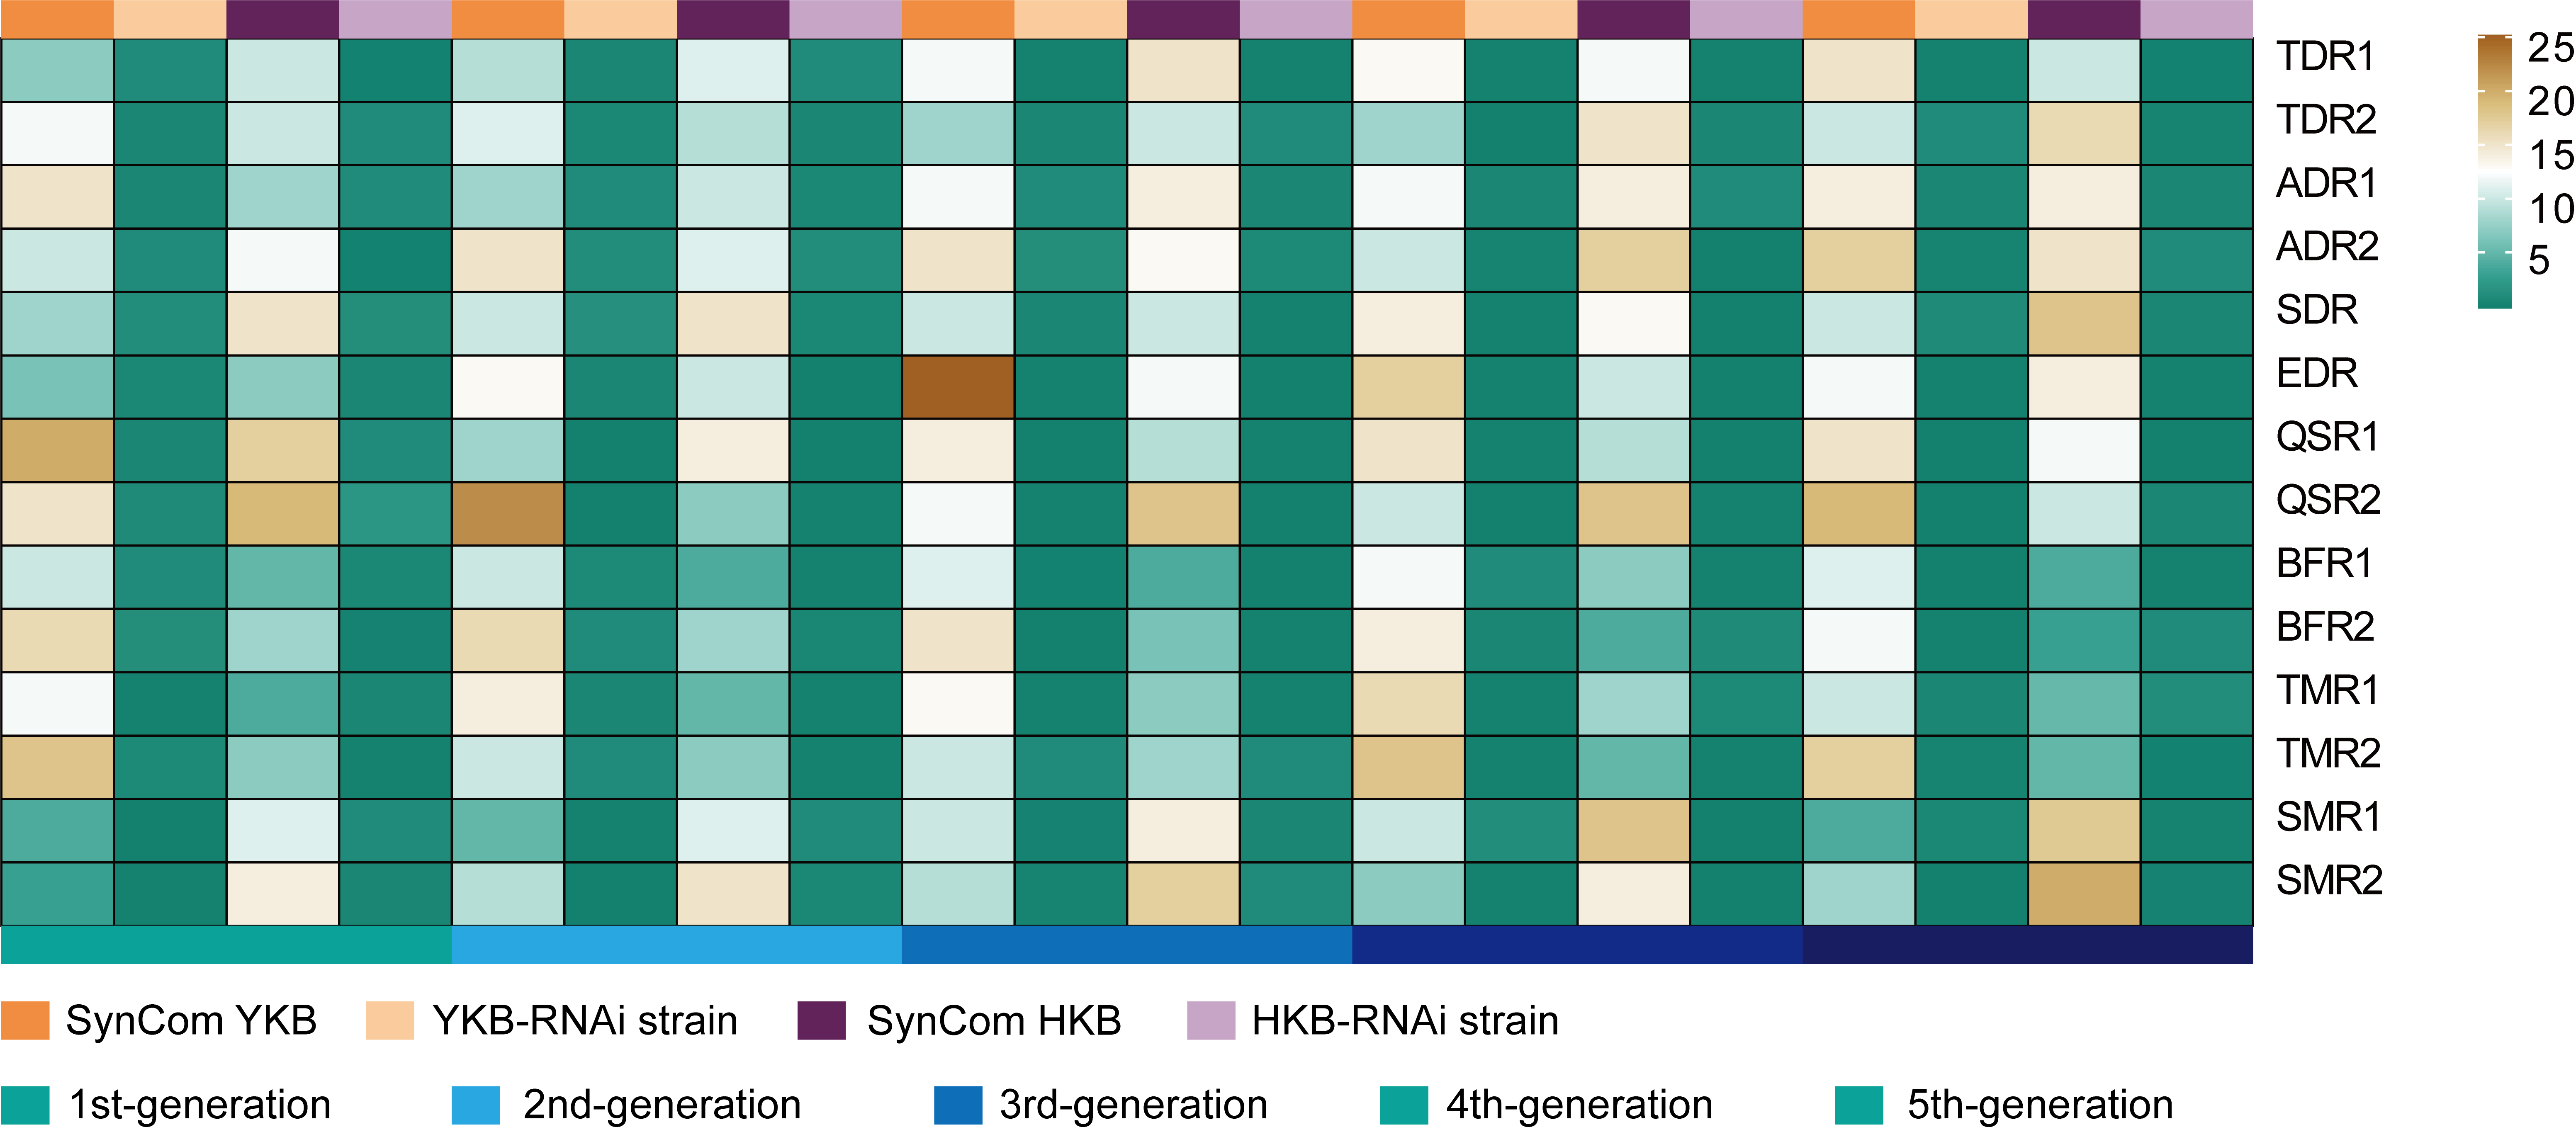


Figure S26 Validation of the expression level of the target gene in 5 generations of interference strains.


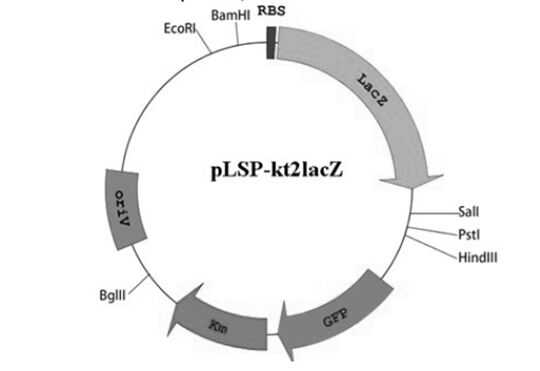


Figure S27 Schematic map of plasmid pLSP kt2lacZ for Reporter gene.


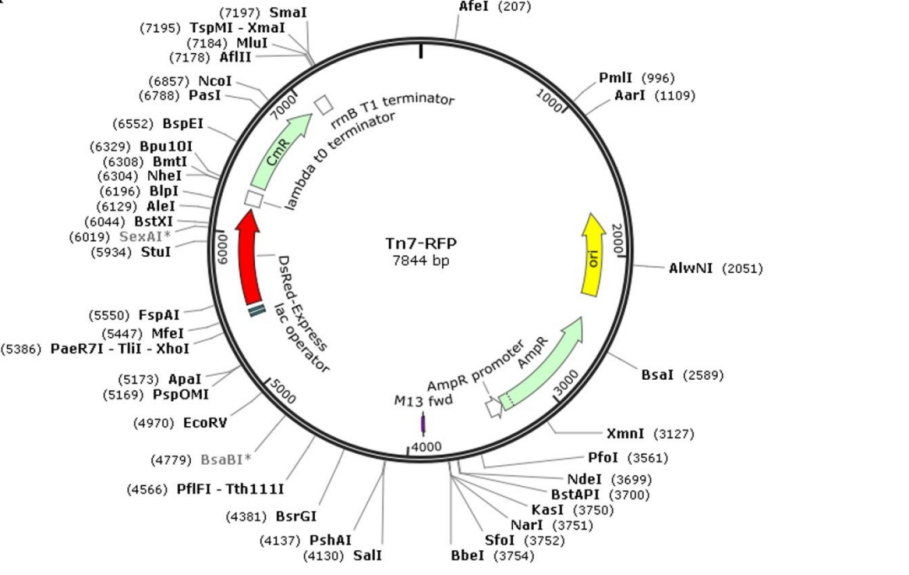


Figure S28 Schematic map of plasmid pTn7-RFP for Fluorescent labeling.

Table S1 Categories and functions of QS signaling molecules

| Categories | Source | Regulatory system | Regulatory target | Functionality |
| --- | --- | --- | --- | --- |
| AHLs | Gram-negative bacteria | LuxI/LuxR | LuxR family, Gram-negative bacteria | Biofilm formation, EPS production, granular sludge formation, microbial metabolic activity, etc. |
| AI-2 | Gram-positive bacteria and Gram-negative bacteria | Pfs/LuxS | Gram-positive bacteria and Gram-negative bacteria | Inter-species communication among microorganisms, biofilm formation, metabolic functions, bioluminescence, and swarming behavior, etc. |
| AIP | Gram-positive bacteria | Two-component control system | Gram-positive bacteria | Inter-species communication among microorganisms, virulence, antibacterial properties, etc. |
| AI-3 | Gut microbiota | LuxS | *E.coli* | Transcription activation of *E. coli* virulence genes, etc. |
| PQS | *Pseudomonas* sp. | 4Q control system | *Pseudomonas aeruginosa* | Biofilm formation, denitrification process, transport system, etc. |

Table S2 Collection sites information of soil samples for functional strain isolation.

|  | **Changtu (CT)** | **Kuancheng (KC)** | **Acheng (AC)** | **Beilin (BL)** | **Hailun (HL)** | **Beian (BA)** |
| --- | --- | --- | --- | --- | --- | --- |
| **Longitude E** | 123.85 | 125.56 | 127.04 | 126.77 | 126.50 | 126.49 |
| **Latitude N** | 42.71 | 42.20 | 45.56 | 46.64 | 47.39 | 48.32 |
| **Soil properties (g/kg)** |  |  |  |  |  |  |
| TC | 13.21 | 16.72 | 22.48 | 28.65 | 31.19 | 35.67 |
| DOC | 0.03 | 0.06 | 0.08 | 0.09 | 0.09 | 0.11 |
| TN | 1.52 | 1.19 | 2.35 | 2.79 | 2.91 | 3.26 |
| DON | 0.03 | 0.05 | 0.07 | 0.13 | 0.14 | 0.17 |
| TP | 0.47 | 0.51 | 0.82 | 1.02 | 1.24 | 1.41 |
| TK | 22.31 | 24.69 | 26.20 | 19.25 | 25.83 | 30.27 |
| **Herbicides (mg/L)** |  |  |  |  |  |  |
| Atrazine | 92.51±4.625 | 86.67±4.334 | 66.51±3.325 | 85.81±4.290 | 83.64±4.182 | 5.457±0.273 |
| Acetochlor | 98.82±4.941 | 94.18±4.709 | 122.9±6.149 | 41.23±2.062 | 24.32±1.216 | 17.17±0.858 |
| Butachlor | 73.73±3.687 | 34.85±1.743 | 127.4±6.374 | 66.02±3.301 | 24.43±1.222 | 7.783±0.389 |
| Metolachlor | 49.81±2.491 | 26.07±1.304 | 45.67±2.283 | 17.32±0.866 | 12.66±0.633 | 5.013±0.251 |
| Metribuzin | 19.99±0.999 | 76.00±3.800 | 26.18±1.309 | 4.902±0.245 | 7.699±0.385 | 8.815±0.441 |
| Nicosulfuron | 17.49±0.874 | 27.21±1.361 | 12.83±0.614 | 7.441±0.372 | 3.803±0.190 | 2.438±0.122 |
| Pyrazosulfuron | 11.25±0.563 | 23.70±1.185 | 5.575±0.279 | 3.960±0.198 | 2.083±0.104 | 1.825±0.090 |
| Fomesafen | 0.687±0.344 | 0.353±0.018 | 4.176±0.209 | 13.08±0.654 | 41.32±2.066 | 84.41±4.220 |

Table S3 Herbicide degradation capability by single strains and mixed bacterial communities.

| Number | Species | Herbicides degradation efficiencies (%) | | | | | | | |
| --- | --- | --- | --- | --- | --- | --- | --- | --- | --- |
|  |  | Atrazine | Acetochlor | Butachlor | Metolachlor | Metribuzin | Nicosulfuron | Pyrazosulfuron | Fomesafen |
| B1 | *Pseudomonas* sp. | 40.4 | 53.3 | 50.6 | 35.9 | 31.1 | 16.7 | 27.3 | 6.18 |
| B2 | *Pseudomonas sp.* | 12.7 | 21.5 | 15.8 | 19.1 | 20.6 | 14.2 | 18.6 | 2.82 |
| B3 | *Pseudomonas* sp. | 21.1 | 15.9 | 27.7 | 18.8 | 35.1 | 17.2 | 20.5 | 3.16 |
| B4 | *Pseudomonas* sp. | 15.5 | 18.7 | 2.46 | 19.5 | 37.3 | 4.75 | 15.4 | 2.97 |
| B5 | *Pseudomonas* sp. | 36.7 | 41.2 | 24.8 | 39.9 | 32.3 | 15.8 | 13.2 | 2.44 |
| R1 | *Ralstonia* sp. | 15.7 | 10.6 | 18.6 | 22.5 | 15.1 | 27.8 | 36.4 | 0.52 |
| R2 | *Ralstonia* sp. | 26.2 | 15.7 | 22.2 | 19.4 | 37.7 | 11.4 | 17.9 | 3.45 |
| R5 | *Ralstonia* sp. | 30.5 | 35.7 | 17.6 | 51.7 | 19.9 | 36.1 | 14.1 | 10.5 |
| R6 | *Ralstonia* sp. | 18.3 | 12.2 | 10.2 | 5.66 | 18.1 | 5.11 | 11.7 | 0.58 |
| H1 | *Bacillus* sp. | 71.6 | 13.5 | 35.2 | 10.7 | 50.9 | 8.85 | 14.6 | 4.63 |
| H3 | *Bacillus* sp. | 17.9 | 12.4 | 5.71 | 12.9 | 11.7 | 15.5 | 5.25 | 1.78 |
| H4 | *Bacillus* sp. | 25.4 | 3.28 | 17.4 | 0.53 | 17.9 | 6.05 | 1.42 | 19.5 |
| H6 | *Bacillus* sp. | 39.1 | 32.8 | 17.9 | 15.2 | 22.4 | 19.2 | 40.5 | 13.2 |
| L3 | *Klebsiella* sp. | 58.4 | 41.4 | 27.8 | 29.5 | 34.8 | 19.5 | 12.1 | 1.55 |
| L5 | *Klebsiella* sp. | 14.8 | 10.6 | 5.88 | 14.2 | 7.93 | 5.88 | 1.86 | 0.51 |
| E2 | *Enterobacter* sp. | 35.5 | 30.7 | 37.1 | 12.2 | 10.5 | 30.3 | 15.7 | 2.74 |
| E3 | *Enterobacter* sp. | 52.4 | 27.3 | 15.5 | 33.7 | 10.6 | 25.4 | 10.7 | 1.23 |
| E4 | *Enterobacter* sp. | 10.6 | 5.57 | 18.7 | 5.85 | 14.9 | 10.9 | 11.3 | 6.13 |
| K1 | *Acinetobacter* sp. | 75.6 | 59.8 | 45.8 | 55.8 | 71.5 | 66.9 | 18.2 | 24.6 |
| K3 | *Acinetobacter* sp. | 18.7 | 12.6 | 10.2 | 24.4 | 18.4 | 2.07 | 15.9 | 5.01 |
| S2 | *Serratia* sp. | 23.2 | 17.4 | 10.2 | 15.6 | 11.6 | 15.5 | 2.78 | 0.99 |
| M1 | *Massilia* sp. | 36.1 | 20.1 | 30.4 | 15.6 | 28.5 | 36.1 | 15.6 | 1.55 |
| M2 | *Massilia* sp. | 22.3 | 11.5 | 5.76 | 15.2 | 7.88 | 10.9 | 15.2 | 1.77 |
| D1 | *Brevundimonas* sp. | 19.3 | 2.98 | 15.6 | 16.6 | 20.5 | 14.4 | 13.8 | 1.19 |
| Y1 | *Comamonas* sp. | 63.6 | 43.9 | 55.9 | 40.6 | 66.2 | 58.8 | 29.1 | 9.23 |
| F2 | *Flavobacterium* sp. | 20.3 | 10.2 | 8.62 | 15.4 | 25.9 | 13.7 | 5.51 | 1.85 |
| O2 | *Bryobacter* sp. | 11.5 | 5.18 | 8.95 | 9.79 | 12.6 | 14.1 | 13.6 | 1.02 |
| U1 | *Burkholderia* sp. | 18.9 | 8.06 | 20.9 | 15.9 | 7.03 | 4.64 | 1.97 | 0.53 |
| C2 | *Sphingobium* sp. | 24.4 | 20.5 | 11.5 | 17.1 | 4.51 | 8.28 | 1.52 | 0.22 |
| Y1+K1 | */* | 85.2 | 61.3 | 72.5 | 60.7 | 71.1 | 71.3 | 54.2 | 46.2 |
| Y1+B1 | */* | 96.1 | 76.2 | 60.3 | 65.1 | 69.3 | 59.6 | 63.3 | 38.5 |
| Y1+H1 | */* | 62.8 | 42.9 | 39.1 | 20.5 | 58.2 | 55.1 | 30.8 | 6.15 |
| K1+B1 | */* | 96.3 | 59.4 | 65.2 | 70.4 | 60.9 | 65.3 | 36.2 | 30.8 |
| K1+H1 | */* | 93.2 | 85.8 | 40.6 | 25.4 | 55.7 | 49.8 | 23.6 | 23.1 |
| B1+H1 | */* | 55.6 | 33.1 | 45.8 | 19.2 | 33.8 | 33.9 | 28.6 | 9.23 |
| K1+B5 | */* | 41.2 | 37.5 | 25.8 | 12.7 | 24.2 | 30.5 | 27.9 | 10.1 |
| K1+L3 | */* | 55.1 | 27.4 | 24.2 | 15.8 | 25.6 | 32.8 | 25.5 | 13.5 |
| K1+M1 | */* | 37.5 | 41.2 | 32.6 | 19.4 | 20.4 | 41.5 | 22.4 | 15.1 |
| B1+H6 | */* | 47.2 | 16.3 | 33.9 | 29.7 | 15.6 | 26.2 | 17.5 | 5.48 |
| H1+M1 | */* | 30.7 | 46.2 | 10.1 | 22.1 | 10.5 | 30.2 | 24.3 | 4.58 |
| H1+E3 | */* | 35.9 | 20.1 | 34.9 | 19.7 | 16.6 | 23.1 | 12.2 | 8.29 |
| B5+H6 | */* | 39.8 | 25.3 | 17.5 | 36.3 | 12.9 | 39.9 | 15.6 | 7.28 |
| B5+E3 | */* | 40.2 | 10.1 | 18.4 | 20.4 | 30.7 | 19.4 | 40.3 | 19.9 |
| R6+L3 | */* | 20.3 | 30.6 | 15.4 | 40.9 | 28.4 | 39.7 | 21.8 | 15.1 |
| R6+M1 | */* | 48.1 | 33.2 | 19.2 | 26.1 | 37.3 | 10.9 | 21.7 | 8.94 |
| H6+E2 | */* | 50.5 | 21.3 | 12.5 | 8.53 | 18.8 | 22.7 | 17.8 | 10.5 |
| L3+M1 | */* | 23.6 | 29.1 | 37.6 | 41.3 | 19.2 | 15.4 | 7.66 | 19.3 |
| E2+M1 | */* | 37.8 | 18.7 | 22.8 | 17.1 | 19.2 | 24.9 | 13.6 | 20.7 |
| Y1+K1+B1 | */* | 99.8 | 86.5 | 91.6 | 85.7 | 96.8 | 94.6 | 99.2 | 89.3 |
| Y1+K1+H1 | */* | 64.1 | 59.2 | 70.1 | 60.9 | 67.2 | 63.9 | 55.1 | 82.1 |
| Y1+B1+H1 | */* | 79.3 | 48.3 | 75.4 | 30.4 | 80.2 | 44.3 | 55.8 | 77.3 |
| K1+B1+H1 | */* | 99.9 | 92.6 | 95.4 | 80.2 | 91.4 | 88.9 | 95.2 | 92.6 |
| K1+B5+L3 | */* | 63.4 | 71.8 | 55.3 | 41.9 | 39.9 | 27.3 | 29.2 | 48.4 |
| K1+H6+E2 | */* | 49.2 | 62.9 | 37.8 | 55.3 | 49.1 | 58.3 | 47.1 | 26.4 |
| B5+H6+E3 | */* | 77.2 | 32.5 | 49.4 | 37.8 | 21.5 | 38.6 | 62.3 | 35.2 |
| Y1+K1+B5+L3 | */* | 69.8 | 61.1 | 62.6 | 34.4 | 58.1 | 42.1 | 49.4 | 60.3 |
| Y1+K1+B1+L3 | */* | 95.5 | 73.7 | 82.6 | 86.6 | 90.5 | 89.8 | 93.3 | 71.8 |
| Y1+B5+H6+E3 | */* | 58.6 | 59.1 | 62.4 | 71.6 | 36.5 | 47.5 | 50.1 | 59.8 |
| K1+B5+H6+E3 | */* | 53.8 | 59.3 | 33.6 | 45.3 | 60.9 | 18.5 | 44.8 | 29.5 |
| H1+K1+B1+L3 | */* | 83.4 | 90.4 | 91.4 | 72.1 | 73.5 | 79.8 | 85.5 | 83.6 |
| Y1+K1+B1+B5+L3 | */* | 87.2 | 79.7 | 83.2 | 86.2 | 90.7 | 92.1 | 93.9 | 80.6 |
| Y1+K1+B1+H6+E3 | */* | 91.1 | 73.9 | 85.5 | 70.6 | 83.3 | 81.8 | 90.7 | 85.2 |
| H1+K1+B1+B5+H6 | */* | 76.6 | 88.1 | 79.3 | 81.7 | 71.5 | 82.4 | 90.3 | 78.7 |
| Other combinations | | < 50 | | | | | | | |

Table S4 The different expression of key proteins between monoculture and co-cultured conditions in SynCom YKB system.

| **Protein description** | **Log2 FC** | **P-adjust** | **Function** |
| --- | --- | --- | --- |
| **YKB+H VS Y1+H** |  |  |  |
| Zinc ABC transporter substrate-binding protein ZnuA | 7.649 | 0.0042 | Inorganic ion transport and metabolism |
| Iron uptake system protein EfeO | 2.682 | 0.1266 |  |
| Glucans biosynthesis protein MdoG | 6.416 | 0.0514 | Energy production and conversion |
| NAD-dependent succinate-semialdehyde dehydrogenase Ssd | 5.834 | 0.0319 |  |
| Sugar PTS system EIIA component Crr | 5.162 | 0.0785 |  |
| Glucose-1-phosphatase Agp | 4.576 | 0.0007 |  |
| Aldose 1-epimerase GalM | 3.099 | 0.2380 |  |
| L-lactate dehydrogenase Ldh | 2.965 | 0.0559 |  |
| Succinyl-CoA synthetase SucDC | 2.539 | 0.0083 |  |
| 2-oxoacid ferredoxin oxidoreductase subunit alpha OorA | -2.615 | 0.0116 |  |
| Succinate dehydrogenase flavoprotein FrdABCD | 5.569 | 0.2862 | Biofilm formation |
| Putative colanic acid biosynthesis glycosyltransferase WcaI | 5.492 | 0.0114 |  |
| N-acetyl-D-mannosaminouronosyltransferase WecG | 4.313 | 0.0186 |  |
| S-ribosylhomocysteine lyase LuxS | 4.961 | 0.4826 | Quorun sensing |
| LuxR family transcriptional regulator LuxR | 4.616 | 0.0017 |  |
| Acyl homoserine lactone synthase LuxI | 4.173 | 0.0109 |  |
| LysR family transcriptional regulator OxyR | 4.019 | 0.0492 |  |
| LysR family transcriptional regulator, glycine cleavage system Transcriptional activator GcvA | 3.186 | 0.3162 |  |
| LuxR family transcriptional regulator, csgAB operon transcriptional Regulatory protein CsgD | 2.739 | 0.3616 |  |
| Atrazine chlorohydrolase AtzA | 8.132 | 0.1379 | Trazine degradation |
| Hydroxydechloroatrazine ethylaminohydrolase AtzB | 4.958 | 0.0093 |  |
| **YKB+H VS K1+H** |  |  |  |
| Atrazine chlorohydrolase AtzA | 7.281 | 0.0658 | Trazine degradation |
| Hydroxydechloroatrazine ethylaminohydrolase AtzB | 6.416 | 0.0435 |  |
| N-isopropylammelide isopropylaminohydrolase AtzC | 4.817 | 0.0272 |  |
| Atrazine monooxygenase ThcBCD | 3.674 | 0.0918 |  |
| Isopropylmalate isomerase MeaA | 5.834 | 0.0009 | Amide degradation |
| Isopropylmalate dehydratase MeaB | 4.721 | 0.0077 |  |
| Cytochrome P450 oxygenase system EthBAD | 4.697 | 0.0294 |  |
| Ferredoxin Cnd | -3.165 | 0.0613 |  |
| 2,4-dichlorophenoxyacetate dioxygenase TfdA | 4.295 | 0.0204 | Metribuzin degradation |
| Manganese ABC transporter MntAD | 3.151 | 0.2757 | Sulfonylureas degradation |
| Carboxylesterase CarE | 2.863 | 0.0098 |  |
| Cytochrome P450 hydroxylase sytem Box AB | 2.713 | 0.0033 |  |
| Nitroreductase DnrA | 4.359 | 0.1301 | Ether degradation |
| S-ribosylhomocysteine lyase LuxS | 6.917 | 0.0126 |  |
| Acyl homoserine lactone synthase LuxI | 6.622 | 0.0215 |  |
| AI-2 ABC transporter periplasmic binding protein LsrB | 6.102 | 0.0170 | Quorun sensing |
| LuxR family transcriptional regulator LuxR | 3.174 | 0.0029 |  |
| **YKB+H VS B1+H** |  |  |  |
| Tryptophan synthase TrpBA | 7.269 | 0.0056 | Tryptophan metabolism |
| Acetyl-CoA acyltransferase FadA | 6.155 | 0.0770 |  |
| Indolepyruvate decarboxylase IpdC | 4.25 | 0.0022 |  |
| Phosphate acetyltransferase | 4.189 | 0.1220 |  |
| 4-hydroxyphenylacetate-3-monooxygenase HpaBA | 3.243 | 0.0007 |  |
| 3-oxoadipyl-CoA thiolase IaaA | -2.719 | 0.0166 |  |
| AI-2 transport system permease protein LsrCD | 6.129 | 0.1696 | Quorun sensing |
| AI-2 ABC transporter periplasmic binding protein LsrB | 4.302 | 0.0170 |  |
| Acyl homoserine lactone synthase LuxI | 4.295 | 0.2596 |  |
| S-ribosylhomocysteine lyase LuxS | 4.290 | 0.0018 |  |
| Two-component system QseBC | 4.287 | 0.0032 |  |
| Carboxylesterase CarE | 4.11 | 0.0584 | Sulfonylureas degradation |
| Cytochrome P450 hydroxylase sytem BoxAB | 3.091 | 0.0199 |  |
| Nitroreductase DnrA | 2.988 | 0.4480 | Ether degradation |

Table S5 The different expression of key proteins between monoculture and co-cultured conditions in SynCom HKB system.

| **Protein description** | **Log2 FC** | **P-adjust** | **Function** |
| --- | --- | --- | --- |
| **HKB+H VS H1+H** |  |  |  |
| Zinc ABC transporter substrate-binding protein ZnuA | 6.523 | 0.0010 | Inorganic ion transport and metabolism |
| Fur family transcriptional regulator, zinc uptake regulator Sur | 4.504 | 0.0025 |  |
| Iron uptake system protein EfeO | 4.131 | 0.0106 |  |
| Glucans biosynthesis protein MdoG | 5.387 | 0.0001 | Energy production and conversion |
| NAD-dependent succinate-semialdehyde dehydrogenase Ssd | 4.192 | 0.0030 |  |
| Sugar PTS system EIIA component Crr | 3.314 | 0.0038 |  |
| Taurine transport system substrate-binding protein TauA | 6.782 | 0.0043 | Sulfur metabolism |
| Taurine-pyruvate aminotransferase Tpa | 5.146 | 0.0039 |  |
| Phosphoadenosine phosphosulfate reductase CysH | 4.033 | 0.0072 |  |
| Adenylylsulfate kinase CysC | 3.181 | 0.0004 |  |
| Sulfite reductase (NADPH) flavoprotein alpha-component CysJ | 3.135 | 0.0007 |  |
| Sulfate adenylyltransferase Sat | 2.937 | 0.0036 |  |
| Taurine dioxygenase TauD | 2.546 | 0.0047 |  |
| S-ribosylhomocysteine lyase LuxS | 5.195 | 0.0025 | Quorun sensing |
| Autoinducer-2 ABC transporter periplasmic binding protein LsrB | 4.181 | 0.0033 |  |
| LuxR family transcriptional regulator LuxR | 4.035 | 0.0444 |  |
| Atrazine chlorohydrolase AtzA | 8.797 | 0.0158 | Trazine degradation |
| Hydroxydechloroatrazine ethylaminohydrolase AtzB | 5.717 | 0.0193 |  |
| **HKB+H VS K1+H** |  |  |  |
| Taurine-pyruvate aminotransferase Tpa | 7.317 | 0.0104 | Sulfur metabolism |
| Phosphoadenosine phosphosulfate reductase CysH | 3.589 | 0.0207 |  |
| Adenylylsulfate kinase CysC | 3.247 | 0.0011 |  |
| Taurine dioxygenase TauD | 3.082 | 0.0002 |  |
| Sulfite reductase (NADPH) flavoprotein alpha-component CysJ | 2.893 | 0.0015 |  |
| Sulfate adenylyltransferase Sat | 2.712 | 0.0003 |  |
| Atrazine chlorohydrolase AtzA | 7.664 | 0.0084 | Trazine degradation |
| Hydroxydechloroatrazine ethylaminohydrolase AtzB | 6.638 | 0.0199 |  |
| N-isopropylammelide isopropylaminohydrolase AtzC | 4.535 | 0.0216 |  |
| Isopropylmalate isomerase MeaA | 5.607 | 0.0196 | Amide degradation |
| Isopropylmalate dehydratase MeaB | 3.476 | 0.0185 |  |
| Cytochrome P450 oxygenase system EthBAD | 2.409 | 0.00256 |  |
| Carboxylesterase CarE | 5.863 | 0.1125 | Sulfonylureas degradation |
| Nitroreductase DnrA | 3.359 | 0.0012 | Ether degradation |
| 3-hydroxyacyl-CoA dehydrogenase FadJ | 7.124 | 0.0028 | Pyruvate metabolism |
| 3-hydroxybutyryl-CoA dehydrogenase PaaH | 6.328 | 0.0021 |  |
| Pyruvate-ferredoxin/flavodoxin oxidoreductase Por | 4.085 | 0.0020 |  |
| Long-chain fatty acid transporter FadL | 3.766 | 0.0011 |  |
| Hydroxyphenylacetate 3-monooxygenase, oxygenase component HpaBA | 3.129 | 0.0124 |  |
| AI-2 ABC transporter periplasmic binding protein LsrB | 5.302 | 0.0001 | Quorun sensing |
| LuxR family transcriptional regulator LuxR | 4.295 | 0.0176 |  |
| Two-component system QseBC | 3.187 | 0.0017 |  |
| **HKB+H VS B1+H** |  |  |  |
| Taurine transport system substrate-binding protein TauA | 3.825 | 0.0015 | Sulfur metabolism |
| Taurine dioxygenase TauD | 8.173 | 0.0133 |  |
| Atrazine chlorohydrolase AtzA | 9.127 | 0.0195 | Trazine degradation |
| Hydroxydechloroatrazine ethylaminohydrolase AtzB | 4.352 | 0.0179 |  |
| N-isopropylammelide isopropylaminohydrolase AtzC | 3.141 | 0.0372 |  |
| Atrazine monooxygenase ThcBCD | 2.753 | 0.0048 |  |
| Isopropylmalate isomerase MeaA | 3.195 | 0.0281 | Amide degradation |
| Isopropylmalate dehydratase MeaB | 2.537 | 0.0400 |  |
| Cytochrome P450 oxygenase system EthBAD | 2.471 | 0.0009 |  |
| Ferredoxin Cnd | 2.058 | 0.0491 |  |
| 2,4-dichlorophenoxyacetate dioxygenase TfdA | 6.174 | 0.0017 | Metribuzin degradation |
| Carboxylesterase CarE | 4.369 | 0.0314 | Sulfonylureas degradation |
| Nitroreductase DnrA | 2.833 | 0.0283 | Ether degradation |
| Pyruvate kinase Pyk | 7.153 | 0.0287 | Pyruvate metabolism |
| Succinate dehydrogenase subunit C FrdC | 5.114 | 0.0170 |  |
| Malate dehydrogenase MaeA | 3.069 | 0.0015 |  |
| Pyruvate dehydrogenase E2 component PdhC | 2.448 | 0.0036 |  |
| S-ribosylhomocysteine lyase LuxS | 5.395 | 0.0268 | Quorun sensing |
| Acyl homoserine lactone synthase LuxI | 5.173 | 0.0021 |  |

Table S6 Information on RNAi strains

| RNAi gene name | Gene Description | RNAi strain number |
| --- | --- | --- |
| *atz*AB | Triazine degradation | TDR1 |
| *tfd*A |  | TDR2 |
| *mea*AB | Amide degradation | ADR1 |
| *eth*BAD |  | ADR2 |
| *car*E | Sulfonylureas degradation | SDR |
| *dnr*A | Ether degradation | EDR |
| *lux*S | Quorum sensing | QSR1 |
| *lux*I |  | QSR2 |
| *csg*D | Biofilm formation | BFR1 |
| *frd*A |  | BFR2 |
| *trp*BA | Tryptophan metabolism | TMR1 |
| *hpa*BA |  | TMR2 |
| *tau*D | Sulfur metabolism | SMR1 |
| *cys*D |  | SMR2 |

Table S7 Effect of interference with key herbicide degradation enzymes on the level of herbicides degradation

|  | **Atrazine** | **Acetochlor** | **Butachlor** | **Metolachlor** | **Metribuzin** | **Nicosulfuron** | **Pyrazosulfuron** | **Fomesafen** |
| --- | --- | --- | --- | --- | --- | --- | --- | --- |
| SynCom"YKB" | 97.65±0.52 | 82.83±0.41 | 88.75±0.66 | 82.00±0.72 | 93.15±1.24 | 89.40±0.83 | 97.50±1.13 | 85.08±0.75 |
| YKB-TDR1 | **23.69±0.73***** | 79.16±1.26 | 80.26±1.15 | 69.37±0.89 | **22.81±1.15***** | **66.38±2.11**** | 88.53±2.19 | 79.34±1.52 |
| YKB-TDR2 | **59.82±1.22***** | 70.64±0.82 | 82.15±0.33 | 72.79±1.12 | **39.55±0.99***** | 75.13±1.76 | 90.13±0.38 | 68.82±2.37 |
| YKB-ADR1 | 83.57±1.53 | **12.83±1.44***** | **20.37±1.91***** | **52.83±1.67***** | **71.16±1.72**** | 80.59±1.08 | **75.26±1.64**** | 75.63±0.93 |
| YKB-ADR2 | 90.18±0.59 | **50.16±2.39***** | **44.53±1.24***** | **21.69±1.42***** | 88.93±1.55 | 85.44±2.22 | 85.63±1.88 | 81.12±0.84 |
| YKB-SDR | **76.91±0.73**** | **63.58±1.71**** | 72.18±0.68 | **59.83±0.59***** | **69.52±1.67**** | **12.77±1.96***** | **10.24±2.08***** | **60.28±1.15**** |
| YKB-EDR | 91.46±1.06 | 69.37±0.63 | **60.96±1.54**** | 70.22±2.08 | 75.34±2.19 | **69.66±0.52**** | **76.38±1.69**** | **20.14±2.64***** |
|  | **Atrazine** | **Acetochlor** | **Butachlor** | **Metolachlor** | **Metribuzin** | **Nicosulfuron** | **Pyrazosulfuron** | **Fomesafen** |
| SynCom"HKB" | 97.98±2.26 | 88.98±1.16 | 92.00±2.28 | 77.00±2.11 | 89.58±2.15 | 84.98±2.31 | 91.25±2.647 | 88.65±2.07 |
| HKB-TDR1 | **15.59±1.19***** | **60.51±2.23**** | 85.51±1.18 | 60.28±0.93 | **33.75±0.67***** | 71.24±1.17 | 83.39±1.51 | 72.25±1.52 |
| HKB-TDR2 | **68.24±2.17**** | 73.26±0.93 | **62.37±0.36**** | 63.34±1.17 | **50.18±1.93***** | 66.59±1.52 | 75.82±3.09 | 80.13±0.96 |
| HKB-ADR1 | **73.79±2.09**** | **20.83±1.14***** | **30.89±1.94***** | **30.69±1.80***** | 80.63±0.54 | 80.16±0.64 | 81.19±2.83 | 82.92±2.31 |
| HKB-ADR2 | 85.68±0.93 | **33.66±1.65***** | **19.83±0.26***** | **17.76±2.25***** | 77.19±1.66 | 73.45±1.91 | 80.66±1.72 | 75.66±1.19 |
| HKB-SDR | **67.15±1.66**** | 79.25±2.27 | 90.05±3.37 | 70.23±1.34 | 85.24±2.81 | **8.92±2.83***** | **10.25±2.11***** | **59.37±1.58***** |
| HKB-EDR | 79.83±1.74 | 81.87±1.88 | 81.22±1.15 | 65.88±0.86 | 73.32±1.77 | 74.33±3.15 | **63.57±0.99**** | **10.06±0.74***** |

Table S8 Effect of interference with key functional enzymes on the level of herbicides degradation and metabolites accumulation

|  | **Herbicides degradation efficiency (%)** | **Biofilm concentration (A595)** | **ATP concentration (mg/g protein)** | **NADH concentration (mg/g protein)** | **Succinate concentration (mg/L)** | **Tryptophan concentration (mg/mL)** | **Taurine concentration (mg/mL)** |
| --- | --- | --- | --- | --- | --- | --- | --- |
| SynCom"YKB" | 100±1.2 | 10.1±0.9 | 3.1±0.02 | 8.9±0.5 | 1.6±0.2 | 23.7±1.1 | 8.6±1.2 |
| YKB-QSR1 | **53.2±0.9***** | **2.9±0.1***** | **0.8±0.01***** | **1.5±0.1***** | 1.1±0.1** | 15.6±0.5****** | **3.4±0.5***** |
| YKB-QSR2 | **41.9±1.5***** | **5.7±0.3***** | **1.1±0.01***** | **0.8±0.2***** | **0.9±0.05***** | **8.8±0.9***** | **1.9±0.1***** |
| YKB-BFR1 | 72.8±2.1 | **0.8±0.01***** | 2.7±0.03 | 5.5±0.3** | **0.5±0.04***** | 18.9±1.3** | 5.6±0.3** |
| YKB-BFR2 | 69.2±1.1** | **1.5±0.05***** | 2.5±0.04 | 6.7±0.1 | **0.8±0.02***** | 20.1±2.5 | 7.1±0.5 |
| YKB-TMR1 | **32.8±0.3***** | 6.7±0.5** | **0.3±0.01***** | **0.6±0.05***** | 1.2±0.1** | **2.5±0.2***** | 6.8±0.2 |
| YKB-TMR2 | **44.5±0.9***** | 8.2±0.7 | **0.1±0.02***** | **3.3±0.1***** | 1.3±0.05 | **3.8±0.4***** | 7.5±0.6 |
| YKB-SMR1 | 79.3±1.4 | 6.2±0.8** | **0.9±0.03***** | **2.6±0.2***** | **0.1±0.04***** | **8.9±0.9***** | **1.3±0.1***** |
| YKB-SMR2 | 61.6±1.7** | **5.3±0.2***** | 1.7±0.04** | **2.2±0.1***** | **0.4±0.01***** | 17.6±1.2 | **2.2±0.05***** |
|  | **Herbicides degradation efficiency (%)** | **Biofilm concentration (A595)** | **ATP concentration (mg/g protein)** | **NADH concentration (mg/g protein)** | **Succinate concentration (mg/L)** | **Tryptophan concentration (mg/mL)** | **Taurine concentration (mg/mL)** |
| SynCom"HKB" | 100±2.4 | 4.1±0.2 | 2.5±0.1 | 14.2±1.1 | 0.9±0.05 | 16.1±1.5 | 14.3±1.5 |
| HKB-QSR1 | **22.9±1.1***** | 2.8±0.1****** | **0.2±0.02***** | **5.6±0.2***** | **0.1±0.01***** | 12.5±2.2** | **0.4±0.2***** |
| HKB-QSR2 | **46.5±1.3***** | **1.9±0.05***** | **0.7±0.03***** | **2.7±0.1***** | **0.4±0.02***** | **8.1±0.9***** | **2.4±0.2***** |
| HKB-BFR1 | 85.9±2.7 | **0.2±0.01***** | **1.5±0.2***** | 10.5±1.3** | 0.7±0.01 | 14.2±1.6 | **8.5±1.3***** |
| HKB-BFR2 | 94.3±2.5 | **0.6±0.03***** | 1.7±0.1** | 12.7±2.5 | 0.6±0.02 | 13.9±1.4 | **6.7±0.8***** |
| HKB-TMR1 | 71.6±1.6 | 3.3±0.2 | **0.4±0.05***** | **3.2±0.3***** | 0.6±0.02 | **0.5±0.05***** | 10.9±1.2** |
| HKB-TMR2 | 65.2±1.0** | 2.7±0.1** | **0.3±0.01***** | **1.9±0.1***** | 0.7±0.03 | **1.6±0.2***** | 12.2±1.5 |
| HKB-SMR1 | **39.9±0.9***** | **1.1±0.01***** | **0.2±0.01***** | **2.6±0.5***** | **0.2±0.01***** | **8.7±1.1***** | **3.4±0.1***** |
| HKB-SMR2 | **42.1±0.5***** | **1.5±0.02***** | **0.6±0.03***** | **4.3±0.3***** | **0.1±0.01***** | 13.5±0.9 | **0.7±0.1***** |

Table S9 Primers and RNA interference sequences designed in this study.

| **Primer** | **Sequence (5’-3’)** | **Description** |
| --- | --- | --- |
| 27 F | AGAGTTTGATCCTGGCTCAG | For strain Verification |
| 1492R | GGTTACCTTGTTACGACTT |
| Y1-16S F | GCAGCAGTGGGGAATTTTGG | For biomass analysis |
| Y1-16S R | TTAGCCCCAGGCTTTTCGTT |
| K1-16S F | ATCTGGCCTAACACTGACGC |
| K1-16S R | CTAAAGCCTCAAAGGCCCCA |
| B1-16S F | AATACAGAGGGTGCAAGCGT |
| B1-16S R | TGGATGCAGTTCCCAGGTTG |
| H1-16S F | ACCTAACCAGAAAGCCACGG |
| H1-16S R | ACTTAAGAAACCGCCTGCGA |
| Tac promoter | TGACAATTAATCATCGGCTCGTATAATGT | For RNAi analysis |
| Y1: TDR1 | Tac + TACGGAACGAAAAGCCTGGG |
| K1: TDR1 | Tac + CAGCTCGTGTCGTGAGATGT |
| B1: TDR1 | Tac + TTGCGCTATCAGATGAGCCT |
| H1: TDR1 | Tac + TTGCTCCCTGATGTTAGCGG |
| Y1: TDR2 | Tac + AATACGTAGGGTGCAAGCGT |
| K1: TDR2 | Tac + CCAGCGAGTAATGTCGGGAA |
| B1: TDR2 | Tac + CAAGGCGACGATCCGTAACT |
| H1: TDR2 | Tac + TAACACGTGGGTAACCTGCC |
| Y1: ADR1 | Tac + CGGCTGATGGCAGATTAGGT |
| K1: ADR1 | Tac + GCAACGCGAAGAACCTTACC |
| B1: ADR1 | Tac + GGAATCTGCCTGGTAGTGGG |
| H1: ADR1 | Tac + GTGAGCCGTTACCTCACCAA |
| Y1: ADR2 | Tac + CCCTCGGGTTGTAAACTGCT |
| K1: ADR2 | Tac + GGTGCCTTCGGGAACTTACA |
| B1: ADR2 | Tac + GAGAAAGCAGGGGACCTTCG |
| H1: ADR2 | Tac + GGAGCTTGCTCCCTGATGTT |
| Y1: SDR | Tac + CGGAACGTGCCTAGTAGTGG |
| K1: SDR | Tac + CAGGGGATCTTCGGACCTTG |
| B1: SDR | Tac + ACTGAGAGATGGTCCAGACT |
| H1: SDR | Tac + TGAGCCGTTACCTCACCAAC |
| Y1: EDR | Tac + ATACGTAGGGTGCAAGCGTT |
| K1: EDR | Tac + TTCGATGCAACGCGAAGAAC |
| B1: EDR | Tac + TAATGGCTCACCAAGGCGAC |
| H1: EDR | Tac + TTGGTGAGGTAACGGCTCAC |
| Y1: QSR1 | Tac + AACGAAAAGCCTGGGGCTAA |
| K1: QSR1 | Tac + CGAAAGCATGGGGAGCAAAC |
| B1: QSR1 | Tac + CTGGAACTTAGTCACGGTCC |
| H1: QSR1 | Tac + TTCAAATAGGGCGGCACCTT |
| Y1: QSR2 | Tac + ATGAAAGCAGGGGACCTTCG |
| K1: QSR2 | Tac + AGATGGATTGGTGCCTTCGG |
| B1: QSR2 | Tac + CCGCGGTAATACAGAGGGTG |
| H1: QSR2 | Tac + GACGAAAGTCTGACGGAGCA |
| Y1: BFR1 | Tac + GAACGTGCCTAGTAGTGGGG |
| K1: BFR1 | Tac + ACGCGAAGAACCTTACCTGG |
| B1: BFR1 | Tac + GGAGAAAGCAGGGGACCTTC |
| H1: BFR1 | Tac + TAACACGTGGGTAACCTGCC |
| Y1: BFR2 | Tac + TCTTCGGATGCTGACGAGTG |
| K1: BFR2 | Tac + AGCGGGTCTGAGAGGATGAT |
| B1: BFR2 | Tac + CTGAGACACGGTCCAGACTC |
| H1: BFR2 | Tac + GTGAGGTAACGGCTCACCAA |
| Y1: TMR1 | Tac + GTGGCGAACGGGTGAGTAAT |
| K1: TMR1 | Tac + CGAAAGCATGGGGAGCAAAC |
| B1: TMR1 | Tac + AACGCTTGCACCCTCTGTAT |
| H1: TMR1 | Tac + TTGCTCCCTGATGTTAGCGG |
| Y1: TMR2 | Tac + AGGCAGCAGTGGGGAATTTT |
| K1: TMR2 | Tac + ACGCGAAGAACCTTACCTGG |
| B1: TMR2 | Tac + CACTGGAACTGAGACACGGT |
| H1: TMR2 | Tac + CTGCACTCAAGTTCCCCAGT |
| Y1: SMR1 | Tac + AAGCCTGCGATCTGTAGCTG |
| K1: SMR1 | Tac + ATCTGGCCTAACACTGACGC |
| B1: SMR1 | Tac + TGGATGCAGTTCCCAGGTTG |
| H1: SMR1 | Tac + TGAACCGCATGGTTCAGACA |
| Y1: SMR2 | Tac + CGGCTGATGGCAGATTAGGT |
| K1: SMR2 | Tac + TGGTGCCTTCGGGAACTTAC |
| B1: SMR2 | Tac + CCGGTGCTTATTCTGTCGGT |
| H1: SMR2 | Tac + CGAGCCCTTTACGCCCAATA |

Table S10 Basic information on herbicides used in this study

| Herbicide | Chemical formula | Molecular weight | Herbicide species | Semi-lethal dose (LD50-rat) |
| --- | --- | --- | --- | --- |
| Atrazine | C8H14ClN5 | 215.68 | Triazine herbicides | 3000 mg/kg |
| Acetochlor | C14H20ClNO2 | 269.77 | Amide herbicides | 763 mg/kg |
| Butachlor | C17H26ClNO2 | 311.85 | Amide herbicides | 2000 mg/kg |
| Metolachlor | C15H22ClNO2 | 283.80 | Amide herbicides | 2780 mg/kg |
| Metribuzin | C7H14N4OS | 214.29 | Triazine herbicides | 2200 mg/kg |
| Nicosulfuron | C15H18N6O6S | 410.41 | Sulfonylureas herbicides | 1000 mg/kg |
| Pyrazosulfuron | C14H18N6O7S | 414.4 | Sulfonylureas herbicides | 5000 mg/kg |
| Fomesafen | C15H10ClF3N2O6S | 438.76 | Ether herbicides | 3160 mg/kg |

Table S11 Soil sample information for the pot experiment.

| **Geographical attributes** | | **Soil properties (g/kg)** | | | | | |
| --- | --- | --- | --- | --- | --- | --- | --- |
| Longitude E | Latitude N | TC | DOC | TN | DON | TP | TK |
| 126.82 | 45.86 | 26.83 | 0.08 | 2.77 | 0.09 | 0.96 | 23.37 |
| **Herbicides (mg/L)** | | | | | | | |
| Atrazine | Acetochlor | Butachlor | Metolachlor | Metribuzin | Nicosulfuron | Pyrazosulfuron | Fomesafen |
| 70.19±4.86 | 109.5±5.14 | 77.95±3.52 | 30.69±4.33 | 17.62±1.64 | 6.72±0.89 | 5.93±1.07 | 11.27±1.34 |
